# Supplementary material for: Dynamics of Influenza A (H5N1) virus protein sequence diversity
Source: PeerJ. 2020 May 27;7:e7954. doi: 10.7717/peerj.7954 (PMC7261124; doi:10.7717/peerj.7954)
Supplement: Table S2 — All percentages are shown to the nearest whole number. a Amino acid number at the start and end of the nonamer position in the protein alignment. The symbol # denotes a highly conserved nonamer position (index incidence ≥90%), & denotes a mixed-variable position (index incidence between 90% & 20%), and + denotes a highly diverse nonamer position (index incidence ≤20%). See Fig. S1 for the definition of diversity motifs. ∗ Positions with total number of sequences less than 100 b Total number of protein sequences analysed at the aligned nonamer position; the difference in number between the nonamer positions was due to the inclusion of both partial and full-length sequences in the alignments. c Shannon nonamer entropy, which indicates the level of diversity of the nonamer sequences at the position (H(x); see Fig. 1 for details). d The index nonamer is the most prevalent sequence at the position. e Variants are nonamer sequences that differ by one or more amino acids from the index sequence. f The major variant is the second most common variant sequence at the position. g Minor variants are multiple different repeated nonamer sequences, each occurring more than once and with an incidence of less than or occasionally equal to the major variant. h Unique variants are nonamer sequences that are observed only once at the position. i Nonatypes are distinct sequences among the variants for a given position. [file peerj-08-7954-s003.xlsx]

## Sheet: Table S2
Supplemental Table S2:
Diversity of avian influenza A (H5N1) virus proteome^ (raw data)
Protein	Aligned nonamers			H(x)c	Indexd		Variantse				Nonatypesi
	Positiona		No.b		Sequence	[%]	Total	Majorf	Minorg	Uniqueh
							%
PB2	#	1-9	845	0.3	MERIKELRD	96.6864	3.3	1.3	1.3	0.7	1.30178
PB2	#	2-10	857	0.3	ERIKELRDL	96.4994	3.5	1.3	1.3	0.9	1.51692
PB2	#	3-11	868	0.3	RIKELRDLM	96.4286	3.6	1.3	1.3	1	1.6129
PB2	#	4-12	877	0.3	IKELRDLMS	96.3512	3.6	1.3	1.5	0.9	1.59635
PB2	#	5-13	880	0.3	KELRDLMSQ	96.25	3.8	1.3	1.6	0.9	1.59091
PB2	#	6-14	881	0.4	ELRDLMSQS	95.4597	4.5	1.2	2.3	1	1.92963
PB2	#	7-15	891	0.4	LRDLMSQSR	95.3984	4.6	1.2	2	1.3	2.0202
PB2	#	8-16	901	0.4	RDLMSQSRT	95.4495	4.6	1.2	2	1.3	1.99778
PB2	#	9-17	911	0.4	DLMSQSRTR	95.6092	4.4	1.2	1.4	1.8	2.30516
PB2	#	10-18	931	0.3	LMSQSRTRE	96.9925	3	0.8	0.8	1.5	1.9334
PB2	#	11-19	980	0.3	MSQSRTREI	96.8367	3.2	0.9	1.1	1.1	1.73469
PB2	#	12-20	1001	0.3	SQSRTREIL	97.2028	2.8	0.9	0.9	1	1.4985
PB2	#	13-21	1007	0.3	QSRTREILT	97.4181	2.6	0.9	0.6	1.1	1.48957
PB2	#	14-22	1016	0.3	SRTREILTK	96.3583	3.6	1	1.7	1	1.5748
PB2	#	15-23	1017	0.2	RTREILTKT	97.5418	2.5	0.6	1.1	0.8	1.27827
PB2	#	16-24	1019	0.2	TREILTKTT	97.4485	2.6	0.6	1.4	0.6	1.17763
PB2	#	17-25	1023	0.2	REILTKTTV	97.654	2.3	0.6	1.2	0.6	1.07527
PB2	#	18-26	1025	0.2	EILTKTTVD	97.8537	2.1	0.6	1.2	0.4	0.878049
PB2	#	19-27	1030	0.2	ILTKTTVDH	97.8641	2.1	0.6	1.2	0.4	0.873786
PB2	#	20-28	1034	0.2	LTKTTVDHM	97.4855	2.5	0.6	1.5	0.4	0.870406
PB2	#	21-29	1042	0.3	TKTTVDHMA	97.3129	2.7	0.6	1.2	0.9	1.2476
PB2	#	22-30	1042	0.3	KTTVDHMAI	97.1209	2.9	0.6	1.5	0.8	1.2476
PB2	#	23-31	1042	0.2	TTVDHMAII	98.2726	1.7	0.6	0.3	0.9	1.05566
PB2	#	24-32	1042	0.2	TVDHMAIIK	98.2726	1.7	0.6	0.3	0.9	1.05566
PB2	#	25-33	1043	0.2	VDHMAIIKK	98.0825	1.9	0.6	0.8	0.6	0.958773
PB2	#	26-34	1044	0.2	DHMAIIKKY	97.9885	2	0.6	0.8	0.7	1.05364
PB2	#	27-35	1045	0.2	HMAIIKKYT	97.9904	2	0.6	0.8	0.7	1.05263
PB2	#	28-36	1045	0.2	MAIIKKYTS	97.9904	2	0.6	0.8	0.7	1.05263
PB2	#	29-37	1047	0.1	AIIKKYTSG	98.5673	1.4	0.3	0.5	0.7	0.95511
PB2	#	30-38	1047	0.1	IIKKYTSGR	98.7584	1.2	0.3	0.3	0.7	0.859599
PB2	#	31-39	1047	0.1	IKKYTSGRQ	98.9494	1.1	0.3	0	0.8	0.859599
PB2	#	32-40	1048	0.1	KKYTSGRQE	98.9504	1	0.3	0.2	0.6	0.763359
PB2	#	33-41	1048	0.1	KYTSGRQEK	98.855	1.1	0.3	0.2	0.7	0.858779
PB2	#	34-42	1050	0.1	YTSGRQEKN	99.0476	1	0.2	0	0.8	0.857143
PB2	#	35-43	1051	0.1	TSGRQEKNP	99.1437	0.9	0.2	0	0.7	0.76118
PB2	#	36-44	1051	0.1	SGRQEKNPA	99.0485	1	0.2	0	0.8	0.856327
PB2	#	37-45	1052	0.1	GRQEKNPAL	98.7643	1.2	0.2	0.2	0.9	1.04563
PB2	#	38-46	1052	0.1	RQEKNPALR	98.6692	1.3	0.2	0.2	1	1.14068
PB2	#	39-47	1052	0.1	QEKNPALRM	98.7643	1.2	0.2	0.2	0.9	1.04563
PB2	#	40-48	1053	0.1	EKNPALRMK	98.8604	1.1	0.2	0.2	0.8	0.949668
PB2	#	41-49	1053	0.1	KNPALRMKW	98.8604	1.1	0.2	0.2	0.8	0.949668
PB2	#	42-50	1053	0.2	NPALRMKWM	98.4805	1.5	0.4	0.6	0.6	0.949668
PB2	#	43-51	1053	0.2	PALRMKWMM	98.4805	1.5	0.4	0.6	0.6	0.949668
PB2	#	44-52	1053	0.1	ALRMKWMMA	98.7654	1.2	0.4	0.4	0.5	0.759734
PB2	#	45-53	1053	0.1	LRMKWMMAM	98.7654	1.2	0.4	0.4	0.5	0.759734
PB2	#	46-54	1053	0.2	RMKWMMAMK	98.1007	1.9	0.9	0.6	0.4	0.664767
PB2	#	47-55	1053	0.2	MKWMMAMKY	98.0057	2	0.9	0.8	0.3	0.664767
PB2	#	48-56	1053	0.2	KWMMAMKYP	98.0057	2	0.9	0.8	0.3	0.664767
PB2	#	49-57	1054	0.2	WMMAMKYPI	97.9127	2.1	0.9	0.8	0.4	0.759013
PB2	#	50-58	1054	0.2	MMAMKYPIT	97.9127	2.1	0.9	0.8	0.4	0.759013
PB2	#	51-59	1054	0.2	MAMKYPITA	98.2922	1.7	0.9	0.4	0.4	0.664137
PB2	#	52-60	1054	0.2	AMKYPITAD	97.8178	2.2	0.9	0.9	0.4	0.664137
PB2	#	53-61	1055	0.2	MKYPITADK	97.346	2.7	0.9	1.3	0.4	0.758294
PB2	#	54-62	1055	0.3	KYPITADKR	97.1564	2.8	0.9	1.3	0.6	0.947867
PB2	#	55-63	1056	0.3	YPITADKRI	97.2538	2.7	0.7	1.3	0.8	1.13636
PB2	&	56-64	1056	1.3	PITADKRII	71.2121	28.8	20.8	6.9	1	1.60985
PB2	&	57-65	1057	1.6	ITADKRIIE	64.5222	35.5	20.5	13.7	1.2	1.98675
PB2	&	58-66	1057	1.7	TADKRIIEM	64.1438	35.9	20.2	14.3	1.4	2.36518
PB2	&	59-67	1057	2	ADKRIIEMI	59.1296	40.9	19.7	19.8	1.4	2.5544
PB2	&	60-68	1057	2	DKRIIEMIP	59.1296	40.9	19.7	19.8	1.4	2.5544
PB2	&	61-69	1057	1.9	KRIIEMIPE	59.6026	40.4	19.7	19.3	1.4	2.5544
PB2	&	62-70	1057	1.9	RIIEMIPER	59.6973	40.3	19.8	19.3	1.2	2.36518
PB2	&	63-71	1057	1.9	IIEMIPERN	59.9811	40	19.8	19.3	0.9	2.08136
PB2	&	64-72	1057	1.8	IEMIPERNE	60.5487	39.5	19.9	18.9	0.7	1.79754
PB2	&	65-73	1058	1	EMIPERNEQ	84.4991	15.5	6.6	8.5	0.4	1.41777
PB2	#	66-74	1058	0.6	MIPERNEQG	91.3989	8.6	5.5	2.8	0.3	1.0397
PB2	#	67-75	1058	0.5	IPERNEQGQ	92.0605	7.9	5.6	2.2	0.2	0.756144
PB2	#	68-76	1058	0.3	PERNEQGQT	96.6919	3.3	0.8	2.3	0.3	0.94518
PB2	#	69-77	1058	0.3	ERNEQGQTL	96.6919	3.3	0.8	2.2	0.4	1.0397
PB2	#	70-78	1058	0.3	RNEQGQTLW	96.8809	3.1	0.8	1.9	0.5	1.0397
PB2	#	71-79	1058	0.3	NEQGQTLWS	97.0699	2.9	0.8	1.7	0.5	0.94518
PB2	#	72-80	1058	0.3	EQGQTLWSK	96.7864	3.2	0.8	1.9	0.6	1.13422
PB2	#	73-81	1058	0.7	QGQTLWSKT	90.3592	9.6	6.1	2.8	0.7	1.41777
PB2	#	74-82	1058	0.7	GQTLWSKTN	90.0756	9.9	6.1	3	0.8	1.60681
PB2	&	75-83	1058	0.7	QTLWSKTND	89.9811	10	6.1	3	0.9	1.70132
PB2	&	76-84	1058	0.7	TLWSKTNDA	89.9811	10	6.2	3	0.8	1.60681
PB2	#	77-85	1058	0.6	LWSKTNDAG	90.7372	9.3	6.3	2.5	0.5	1.13422
PB2	#	78-86	1058	0.6	WSKTNDAGS	90.6427	9.4	6.3	2.5	0.6	1.22873
PB2	#	79-87	1058	0.6	SKTNDAGSD	90.7372	9.3	6.1	2.6	0.5	1.22873
PB2	#	80-88	1058	0.7	KTNDAGSDR	90.1701	9.8	6.1	3.1	0.6	1.41777
PB2	&	81-89	1058	0.9	TNDAGSDRV	85.8223	14.2	6.1	7.7	0.4	1.32325
PB2	#	82-90	1058	0.6	NDAGSDRVM	91.8715	8.1	4	3.9	0.3	1.22873
PB2	#	83-91	1058	0.4	DAGSDRVMV	93.8563	6.1	4	1.9	0.3	0.850662
PB2	#	84-92	1058	0.4	AGSDRVMVS	93.8563	6.1	4	1.9	0.3	0.850662
PB2	#	85-93	1058	0.6	GSDRVMVSP	91.6824	8.3	4	4	0.4	1.0397
PB2	#	86-94	1058	0.6	SDRVMVSPL	91.5879	8.4	4	4	0.5	1.13422
PB2	#	87-95	1058	0.6	DRVMVSPLA	91.3043	8.7	4	4.3	0.5	1.22873
PB2	#	88-96	1058	0.6	RVMVSPLAV	91.3043	8.7	4	4.3	0.5	1.22873
PB2	#	89-97	1058	0.6	VMVSPLAVT	91.7769	8.2	4	3.8	0.5	1.13422
PB2	#	90-98	1058	0.3	MVSPLAVTW	96.0302	4	2.1	1.4	0.5	0.850662
PB2	#	91-99	1058	0.2	VSPLAVTWW	96.9754	3	2.1	0.5	0.5	0.756144
PB2	#	92-100	1058	0.3	SPLAVTWWN	96.7864	3.2	2.1	0.5	0.7	0.94518
PB2	#	93-101	1058	0.3	PLAVTWWNR	96.7864	3.2	2.1	0.5	0.7	0.94518
PB2	#	94-102	1058	0.2	LAVTWWNRN	97.7316	2.3	1.2	0.5	0.6	0.850662
PB2	#	95-103	1058	0.2	AVTWWNRNG	97.8261	2.2	1.2	0.5	0.5	0.756144
PB2	#	96-104	1057	0.2	VTWWNRNGP	98.0132	2	1.2	0.2	0.6	0.756859
PB2	&	97-105	1056	0.9	TWWNRNGPT	79.6402	20.4	17.1	2.5	0.8	1.13636
PB2	&	98-106	1057	1.3	WWNRNGPTT	74.7398	25.3	16.5	7.9	0.9	1.70293
PB2	&	99-107	1057	1.5	WNRNGPTTS	72.5639	27.4	15.4	10.7	1.3	2.45979
PB2	&	100-108	1057	2.3	NRNGPTTST	53.4532	46.5	18.6	26.4	1.5	3.12204
PB2	&	101-109	1055	2.4	RNGPTTSTV	51.8483	48.2	18.6	27.9	1.7	3.50711
PB2	&	102-110	1055	2.4	NGPTTSTVH	51.6588	48.3	18.4	28.2	1.7	3.69668
PB2	&	103-111	1055	2.4	GPTTSTVHY	52.7014	47.3	18.4	27.1	1.8	3.69668
PB2	&	104-112	1055	2.4	PTTSTVHYP	52.3223	47.7	18.4	27.4	1.9	3.88626
PB2	&	105-113	1056	2.4	TTSTVHYPK	52.3674	47.6	18.4	27.5	1.8	3.78788
PB2	&	106-114	1057	1.9	TSTVHYPKV	55.6291	44.4	31.9	11.1	1.4	2.93283
PB2	&	107-115	1057	1.6	STVHYPKVY	57.5213	42.5	33.9	7.4	1.2	2.36518
PB2	&	108-116	1057	1.4	TVHYPKVYK	58.7512	41.2	35.5	4.8	0.9	1.79754
PB2	#	109-117	1057	0.5	VHYPKVYKT	94.3236	5.7	1.8	3.1	0.8	1.60833
PB2	#	110-118	1058	0.3	HYPKVYKTY	96.4083	3.6	1.8	1	0.8	1.22873
PB2	#	111-119	1058	0.3	YPKVYKTYF	96.7864	3.2	1.8	0.9	0.6	0.94518
PB2	#	112-120	1058	0.3	PKVYKTYFE	96.5028	3.5	1.8	1.2	0.5	0.94518
PB2	#	113-121	1058	0.3	KVYKTYFEK	96.8809	3.1	1.8	0.9	0.4	0.756144
PB2	#	114-122	1058	0.3	VYKTYFEKV	96.5028	3.5	1.8	1.5	0.2	0.661626
PB2	#	115-123	1058	0.3	YKTYFEKVE	96.5974	3.4	1.8	1.2	0.4	0.756144
PB2	#	116-124	1058	0.3	KTYFEKVER	96.6919	3.3	1.8	1.2	0.3	0.661626
PB2	#	117-125	1058	0.2	TYFEKVERL	98.3932	1.6	0.6	0.7	0.4	0.661626
PB2	#	118-126	1058	0.3	YFEKVERLK	96.0302	4	2.6	1.1	0.3	0.661626
PB2	#	119-127	1058	0.4	FEKVERLKH	95.1796	4.8	2.6	1.8	0.5	1.0397
PB2	#	120-128	1058	0.4	EKVERLKHG	95.1796	4.8	2.6	1.8	0.5	1.0397
PB2	#	121-129	1058	0.4	KVERLKHGT	94.896	5.1	2.6	1.8	0.8	1.22873
PB2	#	122-130	1058	0.4	VERLKHGTF	94.707	5.3	2.6	1.8	0.9	1.41777
PB2	#	123-131	1058	0.4	ERLKHGTFG	95.1796	4.8	2.6	1.5	0.8	1.22873
PB2	#	124-132	1058	0.4	RLKHGTFGP	95.3686	4.6	2.6	1.5	0.6	1.0397
PB2	#	125-133	1061	0.4	LKHGTFGPV	95.0047	5	2.5	1.6	0.8	1.31951
PB2	#	126-134	1061	0.4	KHGTFGPVH	94.6277	5.4	2.5	2.1	0.8	1.41376
PB2	#	127-135	1061	0.3	HGTFGPVHF	97.361	2.6	0.7	1.2	0.8	1.22526
PB2	#	128-136	1061	0.2	GTFGPVHFR	98.115	1.9	0.8	0.5	0.7	0.942507
PB2	#	129-137	1061	0.2	TFGPVHFRN	98.0207	2	0.8	0.5	0.8	1.03676
PB2	#	130-138	1061	0.1	FGPVHFRNQ	98.9632	1	0.3	0.2	0.6	0.754006
PB2	#	131-139	1061	0.2	GPVHFRNQV	97.738	2.3	1.4	0.5	0.4	0.659755
PB2	#	132-140	1061	0.2	PVHFRNQVK	97.738	2.3	1.4	0.5	0.4	0.659755
PB2	#	133-141	1061	0.2	VHFRNQVKI	97.6437	2.4	1.4	0.5	0.5	0.754006
PB2	#	134-142	1061	0.2	HFRNQVKIR	97.8322	2.2	1.4	0.5	0.3	0.565504
PB2	#	135-143	1061	0.1	FRNQVKIRR	98.3035	1.7	1.4	0	0.3	0.377003
PB2	#	136-144	1061	0.1	RNQVKIRRR	98.3035	1.7	1.4	0	0.3	0.377003
PB2	#	137-145	1061	0.2	NQVKIRRRV	98.115	1.9	1.4	0	0.5	0.565504
PB2	#	138-146	1061	0.1	QVKIRRRVD	98.2092	1.8	1.4	0	0.4	0.471254
PB2	&	139-147	1061	1.4	VKIRRRVDI	49.0104	51	44.3	6.3	0.4	0.754006
PB2	&	140-148	1061	1.4	KIRRRVDIN	48.8219	51.2	44.3	6.5	0.4	0.848256
PB2	&	141-149	1061	1.4	IRRRVDINP	48.8219	51.2	44.2	6.5	0.5	0.942507
PB2	&	142-150	1061	1.4	RRRVDINPG	48.8219	51.2	44.2	6.5	0.5	0.942507
PB2	&	143-151	1061	1.4	RRVDINPGH	48.7276	51.3	44.2	6.5	0.6	1.03676
PB2	&	144-152	1061	1.5	RVDINPGHA	48.3506	51.6	43.7	7.3	0.7	1.31951
PB2	&	145-153	1061	1.5	VDINPGHAD	48.1621	51.8	43.5	7.4	0.8	1.60226
PB2	&	146-154	1060	1.5	DINPGHADL	48.2075	51.8	43.5	7.5	0.8	1.60377
PB2	&	147-155	1060	1.6	INPGHADLS	47.1698	52.8	43.4	8.3	1.1	2.07547
PB2	#	148-156	1060	0.5	NPGHADLSA	94.8113	5.2	1	3.2	0.9	1.79245
PB2	#	149-157	1061	0.3	PGHADLSAK	96.4185	3.6	0.9	1.7	0.9	1.60226
PB2	#	150-158	1061	0.4	GHADLSAKE	96.3242	3.7	0.9	1.7	1	1.69651
PB2	#	151-159	1061	0.4	HADLSAKEA	96.3242	3.7	0.9	1.7	1	1.69651
PB2	#	152-160	1061	0.4	ADLSAKEAQ	96.23	3.8	0.9	1.9	0.9	1.69651
PB2	#	153-161	1060	0.3	DLSAKEAQD	96.8868	3.1	0.9	1.2	0.9	1.50943
PB2	#	154-162	1060	0.3	LSAKEAQDV	97.1698	2.8	0.9	1.1	0.8	1.22642
PB2	#	155-163	1061	0.3	SAKEAQDVI	97.2667	2.7	0.9	1.1	0.7	1.13101
PB2	#	156-164	1061	0.2	AKEAQDVIM	98.3977	1.6	0.3	0.5	0.8	1.13101
PB2	#	157-165	1062	0.1	KEAQDVIME	99.0584	0.9	0.1	0	0.8	0.94162
PB2	#	158-166	1062	0.1	EAQDVIMEV	98.7759	1.2	0.3	0	0.9	1.03578
PB2	#	159-167	1062	0.1	AQDVIMEVV	98.6817	1.3	0.3	0.2	0.8	1.03578
PB2	#	160-168	1062	0.2	QDVIMEVVF	98.5876	1.4	0.3	0.2	0.9	1.12994
PB2	#	161-169	1062	0.1	DVIMEVVFP	98.7759	1.2	0.3	0.2	0.8	0.94162
PB2	#	162-170	1063	0.1	VIMEVVFPN	98.8711	1.1	0.3	0.2	0.7	0.84666
PB2	#	163-171	1064	0.1	IMEVVFPNE	98.9662	1	0.3	0.2	0.6	0.75188
PB2	#	164-172	1064	0.1	MEVVFPNEV	98.8722	1.1	0.3	0.4	0.5	0.75188
PB2	#	165-173	1064	0.1	EVVFPNEVG	98.6842	1.3	0.4	0.7	0.3	0.657895
PB2	#	166-174	1064	0.1	VVFPNEVGA	98.7782	1.2	0.4	0.7	0.2	0.56391
PB2	#	167-175	1064	0.3	VFPNEVGAR	95.4887	4.5	3.6	0.6	0.4	0.657895
PB2	#	168-176	1064	0.4	FPNEVGARI	94.4549	5.5	3.7	1.7	0.2	0.657895
PB2	#	169-177	1064	0.4	PNEVGARIL	94.3609	5.6	3.7	1.7	0.3	0.75188
PB2	#	170-178	1064	0.4	NEVGARILT	94.1729	5.8	3.8	1.7	0.4	0.845865
PB2	#	171-179	1064	0.4	EVGARILTS	94.1729	5.8	3.8	1.7	0.4	0.845865
PB2	#	172-180	1064	0.4	VGARILTSE	94.1729	5.8	3.8	1.7	0.4	0.845865
PB2	#	173-181	1064	0.4	GARILTSES	94.3609	5.6	3.8	1.5	0.4	0.75188
PB2	#	174-182	1064	0.4	ARILTSESQ	94.3609	5.6	4.1	1.1	0.4	0.657895
PB2	#	175-183	1064	0.4	RILTSESQL	94.3609	5.6	4.1	1.1	0.4	0.657895
PB2	#	176-184	1064	0.4	ILTSESQLT	95.2068	4.8	2.7	1.5	0.6	0.93985
PB2	#	177-185	1064	0.3	LTSESQLTI	96.1466	3.9	2.6	0.6	0.7	0.93985
PB2	#	178-186	1064	0.3	TSESQLTIT	95.9586	4	2.6	0.6	0.8	1.12782
PB2	#	179-187	1064	0.4	SESQLTITK	95.3947	4.6	2.6	1.3	0.7	0.93985
PB2	#	180-188	1064	0.4	ESQLTITKE	94.8308	5.2	2.6	1.9	0.7	1.03383
PB2	#	181-189	1064	0.4	SQLTITKEK	94.8308	5.2	2.6	1.9	0.7	1.03383
PB2	#	182-190	1064	0.5	QLTITKEKK	93.985	6	2.6	2.6	0.8	1.2218
PB2	#	183-191	1064	0.6	LTITKEKKE	92.9511	7	2.6	3.7	0.8	1.40977
PB2	#	184-192	1064	0.6	TITKEKKEE	92.8571	7.1	2.6	3.7	0.8	1.50376
PB2	#	185-193	1064	0.4	ITKEKKEEL	95.8647	4.1	0.9	2.3	0.8	1.31579
PB2	#	186-194	1064	0.5	TKEKKEELQ	94.7368	5.3	0.9	3.7	0.7	1.40977
PB2	#	187-195	1064	0.7	KEKKEELQD	92.0113	8	1.7	5.8	0.5	1.40977
PB2	#	188-196	1064	0.6	EKKEELQDC	93.0451	7	1.7	4.9	0.4	1.2218
PB2	#	189-197	1064	0.6	KKEELQDCK	92.8571	7.1	1.7	5	0.5	1.31579
PB2	#	190-198	1063	0.6	KEELQDCKI	92.6623	7.3	1.7	5.4	0.3	1.31703
PB2	#	191-199	1064	0.6	EELQDCKIA	92.7632	7.2	1.7	5.1	0.5	1.40977
PB2	#	192-200	1064	0.5	ELQDCKIAP	93.703	6.3	1.7	4	0.6	1.31579
PB2	#	193-201	1064	0.5	LQDCKIAPL	93.797	6.2	1.7	4	0.5	1.2218
PB2	#	194-202	1063	0.6	QDCKIAPLM	93.0386	7	1.7	4.9	0.4	1.22295
PB2	#	195-203	1063	0.5	DCKIAPLMV	93.6971	6.3	1.8	4	0.6	1.22295
PB2	#	196-204	1063	0.3	CKIAPLMVA	96.6134	3.4	0.8	1.9	0.7	1.12888
PB2	#	197-205	1063	0.3	KIAPLMVAY	96.6134	3.4	0.8	1.9	0.7	1.12888
PB2	#	198-206	1063	0.2	IAPLMVAYM	97.7422	2.3	0.8	0.8	0.7	1.03481
PB2	#	199-207	1064	0.2	APLMVAYML	97.9323	2.1	0.8	0.6	0.7	0.93985
PB2	#	200-208	1064	0.2	PLMVAYMLE	98.3083	1.7	0.8	0.5	0.4	0.657895
PB2	#	201-209	1064	0.2	LMVAYMLER	98.2143	1.8	0.8	0.5	0.5	0.75188
PB2	#	202-210	1064	0.2	MVAYMLERE	98.2143	1.8	0.8	0.5	0.5	0.75188
PB2	#	203-211	1064	0.1	VAYMLEREL	98.9662	1	0.3	0.2	0.6	0.75188
PB2	#	204-212	1064	0.1	AYMLERELV	99.1541	0.8	0.3	0	0.6	0.657895
PB2	#	205-213	1064	0.1	YMLERELVR	99.2481	0.8	0.3	0	0.5	0.56391
PB2	#	206-214	1064	0.1	MLERELVRK	99.1541	0.8	0.3	0	0.6	0.657895
PB2	#	207-215	1064	0.1	LERELVRKT	99.3421	0.7	0.1	0	0.6	0.657895
PB2	#	208-216	1063	0.1	ERELVRKTR	99.2474	0.8	0.1	0	0.7	0.752587
PB2	#	209-217	1063	0.1	RELVRKTRF	99.2474	0.8	0.1	0	0.7	0.752587
PB2	#	210-218	1063	0.1	ELVRKTRFL	99.4356	0.6	0.1	0	0.5	0.56444
PB2	#	211-219	1063	0.1	LVRKTRFLP	99.2474	0.8	0.2	0	0.6	0.658514
PB2	#	212-220	1063	0.2	VRKTRFLPV	98.3067	1.7	0.8	0.4	0.6	0.84666
PB2	#	213-221	1062	0.5	RKTRFLPVA	92.9379	7.1	3.4	3.1	0.6	1.12994
PB2	#	214-222	1062	0.6	KTRFLPVAG	92.5612	7.4	3.4	3.5	0.6	1.22411
PB2	#	215-223	1062	0.5	TRFLPVAGG	92.6554	7.3	3.4	3.5	0.5	1.12994
PB2	#	216-224	1061	0.6	RFLPVAGGT	92.5542	7.4	3.4	3.8	0.3	1.03676
PB2	#	217-225	1062	0.6	FLPVAGGTS	92.1846	7.8	3.4	4.1	0.3	1.12994
PB2	#	218-226	1062	0.6	LPVAGGTSS	92.1846	7.8	3.4	4.1	0.3	1.12994
PB2	#	219-227	1062	0.6	PVAGGTSSV	91.9962	8	3.4	4.1	0.5	1.31827
PB2	#	220-228	1062	0.6	VAGGTSSVY	91.9962	8	3.4	4.1	0.5	1.22411
PB2	#	221-229	1062	0.5	AGGTSSVYI	92.6554	7.3	3.6	3.4	0.4	0.94162
PB2	#	222-230	1060	0.2	GGTSSVYIE	98.3019	1.7	0.4	0.9	0.4	0.754717
PB2	#	223-231	1060	0.4	GTSSVYIEV	94.717	5.3	3.8	1.1	0.4	0.849057
PB2	#	224-232	1060	0.4	TSSVYIEVL	94.717	5.3	3.8	1.1	0.4	0.849057
PB2	#	225-233	1061	0.4	SSVYIEVLH	94.9105	5.1	3.8	0.8	0.5	0.848256
PB2	#	226-234	1061	0.4	SVYIEVLHL	94.8162	5.2	3.9	0.9	0.4	0.754006
PB2	#	227-235	1061	0.4	VYIEVLHLT	94.8162	5.2	3.9	0.9	0.4	0.754006
PB2	#	228-236	1061	0.3	YIEVLHLTQ	95.0047	5	3.9	0.9	0.2	0.565504
PB2	#	229-237	1061	0.4	IEVLHLTQG	94.8162	5.2	3.9	1.1	0.2	0.659755
PB2	#	230-238	1061	0.4	EVLHLTQGT	94.8162	5.2	3.9	1.1	0.2	0.754006
PB2	#	231-239	1061	0.4	VLHLTQGTC	94.8162	5.2	3.9	1.1	0.2	0.754006
PB2	#	232-240	1061	0.1	LHLTQGTCW	98.869	1.1	0.4	0.6	0.2	0.565504
PB2	#	233-241	1061	0.1	HLTQGTCWE	98.869	1.1	0.4	0.6	0.2	0.565504
PB2	#	234-242	1061	0.1	LTQGTCWEQ	98.869	1.1	0.4	0.4	0.4	0.659755
PB2	#	235-243	1061	0.5	TQGTCWEQM	90.8577	9.1	7.8	0.8	0.6	0.942507
PB2	#	236-244	1061	0.5	QGTCWEQMY	90.8577	9.1	7.8	0.8	0.6	0.942507
PB2	#	237-245	1061	0.6	GTCWEQMYT	90.5749	9.4	7.8	1	0.6	1.03676
PB2	#	238-246	1061	0.5	TCWEQMYTP	90.7634	9.2	7.8	0.8	0.6	0.942507
PB2	#	239-247	1061	0.5	CWEQMYTPG	90.7634	9.2	7.8	1.1	0.3	0.754006
PB2	#	240-248	1061	0.5	WEQMYTPGG	90.6692	9.3	7.8	1.1	0.4	0.848256
PB2	&	241-249	1061	0.7	EQMYTPGGE	88.6899	11.3	7.7	2.7	0.8	1.41376
PB2	&	242-250	1061	0.7	QMYTPGGEV	88.5014	11.5	7.7	2.7	1	1.60226
PB2	&	243-251	1061	0.8	MYTPGGEVR	88.4072	11.6	7.4	3.2	1	1.79076
PB2	#	244-252	1061	0.4	YTPGGEVRN	95.9472	4.1	1.5	1.7	0.8	1.50801
PB2	#	245-253	1061	0.4	TPGGEVRND	96.0415	4	1.5	1.7	0.8	1.41376
PB2	#	246-254	1060	0.4	PGGEVRNDD	96.1321	3.9	1.5	1.4	0.9	1.50943
PB2	#	247-255	1060	0.5	GGEVRNDDV	94.5283	5.5	1.4	2.8	1.2	1.98113
PB2	#	248-256	1060	0.5	GEVRNDDVD	94.6226	5.4	1.5	2.6	1.2	1.88679
PB2	#	249-257	1060	0.5	EVRNDDVDQ	94.717	5.3	1.5	2.6	1.1	1.79245
PB2	#	250-258	1060	0.3	VRNDDVDQS	96.5094	3.5	1.2	1.4	0.8	1.32075
PB2	#	251-259	1060	0.3	RNDDVDQSL	96.6038	3.4	1.2	1.4	0.8	1.22642
PB2	#	252-260	1059	0.4	NDDVDQSLI	95.373	4.6	2.1	1.8	0.8	1.22757
PB2	#	253-261	1059	0.4	DDVDQSLII	95.5619	4.4	2.2	1.6	0.7	1.03872
PB2	#	254-262	1059	0.4	DVDQSLIIA	95.5619	4.4	2.2	1.4	0.8	1.13314
PB2	#	255-263	1060	0.4	VDQSLIIAA	95.566	4.4	2.2	1.4	0.8	1.13208
PB2	#	256-264	1060	0.2	DQSLIIAAR	97.0755	2.9	2.2	0	0.8	0.849057
PB2	#	257-265	1060	0.3	QSLIIAARN	96.6981	3.3	2.2	0.3	0.8	1.03774
PB2	#	258-266	1062	0.3	SLIIAARNI	96.7043	3.3	2.2	0.3	0.8	1.03578
PB2	#	259-267	1062	0.3	LIIAARNIV	96.7043	3.3	2.2	0.3	0.8	1.03578
PB2	#	260-268	1062	0.3	IIAARNIVR	96.7043	3.3	2.2	0.5	0.7	0.94162
PB2	#	261-269	1063	0.1	IAARNIVRR	98.777	1.2	0.3	0.2	0.8	0.940734
PB2	#	262-270	1063	0.1	AARNIVRRA	98.683	1.3	0.3	0.4	0.7	0.940734
PB2	#	263-271	1063	0.2	ARNIVRRAT	98.3067	1.7	0.3	0.7	0.8	1.12888
PB2	#	264-272	1063	0.2	RNIVRRATV	98.0245	2	0.5	0.9	0.6	1.03481
PB2	#	265-273	1064	0.2	NIVRRATVS	98.1203	1.9	0.5	0.9	0.5	0.93985
PB2	#	266-274	1064	0.2	IVRRATVSA	97.8383	2.2	0.7	0.9	0.6	0.93985
PB2	#	267-275	1065	0.2	VRRATVSAD	97.7465	2.3	0.7	1	0.6	0.938967
PB2	#	268-276	1065	0.2	RRATVSADP	97.7465	2.3	0.7	1	0.6	0.938967
PB2	#	269-277	1065	0.2	RATVSADPL	97.7465	2.3	0.7	0.8	0.8	1.03286
PB2	#	270-278	1065	0.2	ATVSADPLA	97.5587	2.4	0.7	1	0.8	1.12676
PB2	#	271-279	1065	0.2	TVSADPLAS	97.5587	2.4	0.8	0.9	0.8	1.12676
PB2	#	272-280	1070	0.2	VSADPLASL	98.1308	1.9	0.7	0.6	0.6	0.841121
PB2	#	273-281	1070	0.1	SADPLASLL	98.5047	1.5	0.7	0.2	0.6	0.747664
PB2	#	274-282	1070	0.1	ADPLASLLE	98.5047	1.5	0.7	0.2	0.6	0.747664
PB2	#	275-283	1070	0.1	DPLASLLEM	99.1589	0.8	0.2	0	0.7	0.747664
PB2	#	276-284	1070	0.1	PLASLLEMC	99.2523	0.7	0.2	0	0.6	0.654206
PB2	#	277-285	1070	0.1	LASLLEMCH	99.1589	0.8	0.2	0	0.7	0.747664
PB2	#	278-286	1070	0.1	ASLLEMCHS	98.6916	1.3	0.7	0.2	0.5	0.654206
PB2	#	279-287	1070	0.1	SLLEMCHST	98.972	1	0.7	0	0.4	0.46729
PB2	#	280-288	1069	0.3	LLEMCHSTQ	94.7615	5.2	4.1	0.9	0.2	0.467727
PB2	#	281-289	1069	0.4	LEMCHSTQI	94.6679	5.3	4.1	0.9	0.3	0.561272
PB2	#	282-290	1069	0.4	EMCHSTQIG	94.4808	5.5	4.1	0.9	0.5	0.748363
PB2	#	283-291	1070	0.4	MCHSTQIGG	94.486	5.5	4.1	0.9	0.5	0.747664
PB2	#	284-292	1070	0.7	CHSTQIGGI	90.1869	9.8	3.2	6.1	0.6	1.21495
PB2	&	285-293	1069	0.8	HSTQIGGIR	88.9616	11	3.2	7.3	0.6	1.40318
PB2	&	286-294	1069	0.8	STQIGGIRM	89.0552	10.9	3.2	7.3	0.5	1.30964
PB2	&	287-295	1069	0.9	TQIGGIRMV	88.5875	11.4	3.2	7.6	0.7	1.59027
PB2	&	288-296	1069	0.9	QIGGIRMVD	88.4004	11.6	3.2	7.5	0.9	1.87091
PB2	&	289-297	1069	0.8	IGGIRMVDI	89.3358	10.7	4.2	5.5	0.9	1.68382
PB2	&	290-298	1070	0.8	GGIRMVDIL	89.4393	10.6	4.2	5.5	0.8	1.58879
PB2	&	291-299	1069	0.9	GIRMVDILR	87.5585	12.4	4.1	7.4	0.9	1.96445
PB2	&	292-300	1070	1	IRMVDILRQ	87.3832	12.6	4	7.6	1	2.14953
PB2	#	293-301	1071	0.5	RMVDILRQN	93.6508	6.3	2.5	3.1	0.7	1.5873
PB2	#	294-302	1073	0.5	MVDILRQNP	94.5946	5.4	2.5	2.1	0.7	1.49115
PB2	#	295-303	1072	0.6	VDILRQNPT	93.5634	6.4	2.5	3.1	0.8	1.77239
PB2	#	296-304	1074	0.5	DILRQNPTE	94.6927	5.3	2.5	2	0.8	1.58287
PB2	#	297-305	1074	0.4	ILRQNPTEE	94.7858	5.2	2.5	2	0.7	1.48976
PB2	#	298-306	1075	0.4	LRQNPTEEQ	94.9767	5	2.5	1.8	0.7	1.39535
PB2	#	299-307	1075	0.4	RQNPTEEQA	94.9767	5	2.5	1.8	0.7	1.39535
PB2	#	300-308	1077	0.2	QNPTEEQAV	97.7716	2.2	0.6	0.9	0.6	1.11421
PB2	#	301-309	1076	0.7	NPTEEQAVD	90.6134	9.4	4.6	4.2	0.6	1.20818
PB2	#	302-310	1076	0.6	PTEEQAVDI	90.8922	9.1	4.6	4	0.5	1.0223
PB2	#	303-311	1087	0.6	TEEQAVDIC	91.1684	8.8	4.6	3.7	0.6	1.01196
PB2	#	304-312	1087	0.6	EEQAVDICK	91.3523	8.6	4.6	3.6	0.5	0.827967
PB2	#	305-313	1087	0.6	EQAVDICKA	91.3523	8.6	4.6	3.6	0.5	0.827967
PB2	#	306-314	1087	0.6	QAVDICKAA	91.3523	8.6	4.6	3.6	0.5	0.827967
PB2	#	307-315	1087	0.7	AVDICKAAM	90.3404	9.7	4.6	4.6	0.5	1.01196
PB2	#	308-316	1088	0.7	VDICKAAMG	90.4412	9.6	4.6	4.6	0.4	0.919118
PB2	&	309-317	1088	0.8	DICKAAMGL	88.0515	11.9	4.6	6.8	0.6	1.19485
PB2	#	310-318	1089	0.5	ICKAAMGLR	94.2149	5.8	2.3	3	0.5	0.918274
PB2	#	311-319	1089	0.5	CKAAMGLRI	94.123	5.9	2.3	3	0.6	1.0101
PB2	#	312-320	1092	0.5	KAAMGLRIS	94.0476	6	2.3	3	0.6	1.0989
PB2	#	313-321	1100	0.4	AAMGLRISS	95	5	2.3	2	0.7	1.09091
PB2	#	314-322	1106	0.4	AMGLRISSS	95.0271	5	2.3	2.1	0.6	0.994575
PB2	#	315-323	1107	0.4	MGLRISSSF	95.0316	5	2.3	2.1	0.6	0.993677
PB2	#	316-324	1107	0.3	GLRISSSFS	95.935	4.1	2.3	1.2	0.6	0.813008
PB2	#	317-325	1108	0.3	LRISSSFSF	95.6679	4.3	2.3	1.4	0.7	0.99278
PB2	#	318-326	1109	0.2	RISSSFSFG	98.1064	1.9	1.3	0.2	0.5	0.631199
PB2	#	319-327	1109	0.2	ISSSFSFGG	97.6555	2.3	1.6	0.2	0.5	0.721371
PB2	#	320-328	1109	0.2	SSSFSFGGF	97.6555	2.3	1.6	0.2	0.5	0.721371
PB2	#	321-329	1109	0.2	SSFSFGGFT	97.4752	2.5	1.6	0.4	0.5	0.811542
PB2	#	322-330	1110	0.2	SFSFGGFTF	97.5676	2.4	1.6	0.4	0.5	0.720721
PB2	#	323-331	1110	0.2	FSFGGFTFK	97.3874	2.6	1.6	0.4	0.6	0.900901
PB2	#	324-332	1112	0.2	SFGGFTFKR	97.3022	2.7	1.6	0.4	0.7	0.989209
PB2	#	325-333	1117	0.2	FGGFTFKRT	97.2247	2.8	1.6	0.4	0.7	0.984781
PB2	#	326-334	1119	0.3	GGFTFKRTS	96.5147	3.5	1.6	1.2	0.7	1.07239
PB2	#	327-335	1119	0.3	GFTFKRTSG	96.5147	3.5	1.6	1.2	0.7	1.07239
PB2	#	328-336	1119	0.3	FTFKRTSGS	96.336	3.7	1.6	1.3	0.8	1.25112
PB2	#	329-337	1120	0.3	TFKRTSGSS	96.5179	3.5	1.6	1.1	0.8	1.16071
PB2	&	330-338	1146	0.9	FKRTSGSSV	85.3403	14.7	10	4.1	0.5	1.22164
PB2	&	331-339	1146	2	KRTSGSSVT	50.0873	49.9	32.5	16.4	1	2.35602
PB2	&	332-340	1146	2.2	RTSGSSVTK	50.0873	49.9	27	21.9	1	2.53054
PB2	&	333-341	1160	2.2	TSGSSVTKE	49.569	50.4	27.2	22.2	1.1	2.75862
PB2	&	334-342	1161	2.2	SGSSVTKEE	49.7847	50.2	27.1	21.7	1.4	2.84238
PB2	&	335-343	1163	2.2	GSSVTKEEE	49.871	50.1	27.3	21.6	1.2	2.57954
PB2	&	336-344	1163	2.5	SSVTKEEEV	48.6672	51.3	22.8	27.3	1.3	3.18143
PB2	&	337-345	1175	2.4	SVTKEEEVL	49.4468	50.6	23.7	25.6	1.2	2.80851
PB2	&	338-346	1175	2.4	VTKEEEVLT	49.4468	50.6	23.7	25.6	1.2	2.80851
PB2	&	339-347	1176	1.8	TKEEEVLTG	53.4014	46.6	30.2	15.5	0.9	1.95578
PB2	&	340-348	1181	0.8	KEEEVLTGN	86.1981	13.8	6.3	7	0.5	1.10076
PB2	#	341-349	1181	0.5	EEEVLTGNL	92.464	7.5	6.2	0.8	0.5	0.84674
PB2	#	342-350	1181	0.5	EEVLTGNLQ	92.6334	7.4	6.2	0.7	0.5	0.762066
PB2	#	343-351	1181	0.6	EVLTGNLQT	90.0931	9.9	6.3	3.3	0.3	0.677392
PB2	#	344-352	1182	0.6	VLTGNLQTL	90.1015	9.9	6.3	3.3	0.3	0.676819
PB2	#	345-353	1182	0.4	LTGNLQTLK	94.9239	5.1	2.6	2.2	0.3	0.507614
PB2	#	346-354	1183	0.5	TGNLQTLKI	92.6458	7.4	2.6	4.5	0.3	0.676247
PB2	&	347-355	1183	0.9	GNLQTLKIR	84.6154	15.4	7.4	7.5	0.5	1.0989
PB2	&	348-356	1183	1.1	NLQTLKIRV	83.0093	17	7.4	9	0.6	1.35249
PB2	&	349-357	1183	1.4	LQTLKIRVH	77.5148	22.5	7.4	14.5	0.6	1.60609
PB2	&	350-358	1183	1.4	QTLKIRVHE	77.0076	23	7.4	15	0.7	1.85968
PB2	&	351-359	1184	1.4	TLKIRVHEG	77.1115	22.9	7.3	14.9	0.6	1.77365
PB2	&	352-360	1184	1.3	LKIRVHEGY	79.7297	20.3	7.3	12.5	0.4	1.52027
PB2	&	353-361	1187	1.3	KIRVHEGYE	79.781	20.2	7.3	12.5	0.4	1.51643
PB2	&	354-362	1187	1.1	IRVHEGYEE	81.3816	18.6	7.3	10.9	0.4	1.34794
PB2	&	355-363	1187	1	RVHEGYEEF	83.572	16.4	7.3	8.8	0.3	1.0952
PB2	#	356-364	1187	0.6	VHEGYEEFT	91.4912	8.5	5.8	2.4	0.3	0.84246
PB2	#	357-365	1187	0.5	HEGYEEFTM	92.4179	7.6	6	1.3	0.3	0.673968
PB2	#	358-366	1188	0.2	EGYEEFTMV	98.2323	1.8	0.5	1	0.3	0.589226
PB2	#	359-367	1187	0.1	GYEEFTMVG	98.8206	1.2	0.5	0.4	0.3	0.42123
PB2	&	360-368	1186	1.1	YEEFTMVGR	57.5885	42.4	41	0.9	0.5	0.927487
PB2	&	361-369	1186	1.3	EEFTMVGRR	56.3238	43.7	39.8	3	0.9	1.68634
PB2	&	362-370	1186	1.3	EFTMVGRRA	56.2395	43.8	39.8	3	1	1.77066
PB2	&	363-371	1186	1.3	FTMVGRRAT	56.2395	43.8	39.8	3	1	1.77066
PB2	&	364-372	1187	1.3	TMVGRRATA	56.1078	43.9	39.8	2.9	1.2	1.93766
PB2	&	365-373	1187	1.3	MVGRRATAI	56.1078	43.9	39.8	2.9	1.1	1.85341
PB2	&	366-374	1187	1.3	VGRRATAIL	56.2763	43.7	40.1	2.6	1	1.68492
PB2	&	367-375	1187	1.3	GRRATAILR	56.0236	44	40.3	2.7	1	1.68492
PB2	&	368-376	1188	1.3	RRATAILRK	56.0606	43.9	40.2	2.7	1	1.6835
PB2	#	369-377	1189	0.4	RATAILRKA	96.1312	3.9	1.8	1.3	0.8	1.34567
PB2	#	370-378	1189	0.2	ATAILRKAT	98.5702	1.4	0.3	0.4	0.7	0.925147
PB2	#	371-379	1189	0.2	TAILRKATR	98.2338	1.8	0.3	0.7	0.8	1.09336
PB2	#	372-380	1189	0.3	AILRKATRR	97.0563	2.9	1.2	0.9	0.8	1.26156
PB2	#	373-381	1189	0.5	ILRKATRRL	93.524	6.5	3.7	2	0.8	1.26156
PB2	#	374-382	1189	0.5	LRKATRRLI	93.1034	6.9	3.7	2.5	0.7	1.26156
PB2	#	375-383	1187	0.5	RKATRRLIQ	93.2603	6.7	3.7	2.4	0.7	1.17944
PB2	#	376-384	1187	0.5	KATRRLIQL	93.3446	6.7	3.7	2.3	0.7	1.0952
PB2	#	377-385	1187	0.6	ATRRLIQLI	92.5864	7.4	3.7	2.9	0.8	1.26369
PB2	#	378-386	1187	0.6	TRRLIQLIV	92.5021	7.5	4	2.6	0.8	1.26369
PB2	#	379-387	1187	0.5	RRLIQLIVS	92.5864	7.4	4	2.7	0.8	1.17944
PB2	#	380-388	1187	0.5	RLIQLIVSG	93.0076	7	4	2.4	0.7	1.01095
PB2	#	381-389	1189	0.6	LIQLIVSGR	90.5803	9.4	4	4.6	0.8	1.09336
PB2	&	382-390	1188	1.3	IQLIVSGRD	56.0606	43.9	38.6	4.6	0.8	1.26263
PB2	&	383-391	1188	1.3	QLIVSGRDE	56.229	43.8	38.5	4.4	0.9	1.43098
PB2	&	384-392	1191	1.3	LIVSGRDEQ	56.2552	43.7	38.4	4.5	0.9	1.42737
PB2	&	385-393	1191	1.3	IVSGRDEQS	56.5071	43.5	38.3	4.5	0.8	1.25945
PB2	&	386-394	1191	1.3	VSGRDEQSI	56.927	43.1	38.5	3.9	0.8	1.09152
PB2	&	387-395	1191	1.4	SGRDEQSIA	56.0034	44	38.1	5.2	0.7	1.17548
PB2	&	388-396	1191	1.4	GRDEQSIAE	56.0034	44	38.2	5.1	0.7	1.17548
PB2	&	389-397	1191	1.4	RDEQSIAEA	55.8354	44.2	38.2	5	0.9	1.42737
PB2	&	390-398	1191	1.3	DEQSIAEAI	57.4307	42.6	39	2.7	0.9	1.42737
PB2	#	391-399	1192	0.3	EQSIAEAII	96.1409	3.9	1.3	1.4	1.1	1.34228
PB2	#	392-400	1192	0.3	QSIAEAIIV	96.4765	3.5	1.3	1.1	1.1	1.25839
PB2	#	393-401	1192	0.3	SIAEAIIVA	96.3087	3.7	1.3	1.3	1	1.25839
PB2	#	394-402	1192	0.3	IAEAIIVAM	96.3926	3.6	1.3	1.3	0.9	1.1745
PB2	#	395-403	1188	0.3	AEAIIVAMV	96.5488	3.5	1.3	1.3	0.8	1.0101
PB2	#	396-404	1188	0.3	EAIIVAMVF	96.633	3.4	1.2	1.3	0.8	1.09428
PB2	#	397-405	1188	0.3	AIIVAMVFS	96.633	3.4	1.2	1.3	0.8	1.09428
PB2	#	398-406	1188	0.3	IIVAMVFSQ	96.8013	3.2	1.2	1.4	0.6	0.841751
PB2	#	399-407	1188	0.2	IVAMVFSQE	97.9798	2	1.2	0.3	0.5	0.673401
PB2	#	400-408	1188	0.2	VAMVFSQED	97.3064	2.7	1.2	1.3	0.3	0.505051
PB2	#	401-409	1187	0.2	AMVFSQEDC	97.1356	2.9	1	1.6	0.3	0.673968
PB2	#	402-410	1188	0.2	MVFSQEDCM	97.4747	2.5	1	1.3	0.3	0.589226
PB2	#	403-411	1188	0.3	VFSQEDCMI	96.3805	3.6	1	2.4	0.3	0.757576
PB2	#	404-412	1189	0.3	FSQEDCMIK	96.3835	3.6	1	2.4	0.3	0.756939
PB2	#	405-413	1189	0.2	SQEDCMIKA	97.4769	2.5	0.9	1.4	0.2	0.504626
PB2	#	406-414	1189	0.2	QEDCMIKAV	97.561	2.4	0.9	1.3	0.2	0.504626
PB2	#	407-415	1189	0.2	EDCMIKAVR	97.561	2.4	0.9	1.3	0.2	0.504626
PB2	#	408-416	1189	0.2	DCMIKAVRG	97.2246	2.8	0.9	1.6	0.3	0.672834
PB2	#	409-417	1189	0.2	CMIKAVRGD	98.0656	1.9	0.9	0.8	0.3	0.58873
PB2	#	410-418	1190	0.1	MIKAVRGDL	98.4874	1.5	0.9	0.4	0.2	0.420168
PB2	#	411-419	1190	0.2	IKAVRGDLN	98.3193	1.7	0.9	0.4	0.3	0.588235
PB2	#	412-420	1189	0.1	KAVRGDLNF	99.159	0.8	0.3	0.3	0.3	0.504626
PB2	#	413-421	1189	0.2	AVRGDLNFV	98.4861	1.5	0.3	0.8	0.4	0.756939
PB2	#	414-422	1189	0.2	VRGDLNFVN	98.4861	1.5	0.3	0.8	0.4	0.756939
PB2	#	415-423	1189	0.1	RGDLNFVNR	98.5702	1.4	0.3	0.8	0.3	0.672834
PB2	#	416-424	1189	0.1	GDLNFVNRA	98.5702	1.4	0.3	0.8	0.3	0.672834
PB2	#	417-425	1189	0.1	DLNFVNRAN	98.6543	1.3	0.3	0.5	0.5	0.756939
PB2	#	418-426	1189	0.1	LNFVNRANQ	98.6543	1.3	0.3	0.5	0.5	0.756939
PB2	#	419-427	1189	0.2	NFVNRANQR	98.4861	1.5	0.3	0.5	0.7	0.925147
PB2	#	420-428	1189	0.2	FVNRANQRL	98.4861	1.5	0.3	0.5	0.7	0.925147
PB2	#	421-429	1190	0.2	VNRANQRLN	98.4874	1.5	0.3	0.5	0.7	0.92437
PB2	#	422-430	1190	0.5	NRANQRLNP	90.8403	9.2	8.3	0.3	0.6	0.756303
PB2	#	423-431	1190	0.5	RANQRLNPM	90.8403	9.2	8.3	0.3	0.6	0.756303
PB2	#	424-432	1190	0.5	ANQRLNPMH	90.5882	9.4	8.3	0.4	0.7	0.92437
PB2	#	425-433	1190	0.5	NQRLNPMHQ	90.5042	9.5	8.3	0.4	0.8	1.0084
PB2	#	426-434	1190	0.5	QRLNPMHQL	90.5882	9.4	8.3	0.4	0.7	0.92437
PB2	#	427-435	1190	0.5	RLNPMHQLL	90.4202	9.6	8.3	0.7	0.6	0.92437
PB2	#	428-436	1190	0.5	LNPMHQLLR	90.3361	9.7	8.4	0.8	0.4	0.840336
PB2	#	429-437	1190	0.5	NPMHQLLRH	90.4202	9.6	8.4	0.8	0.3	0.756303
PB2	#	430-438	1190	0.5	PMHQLLRHF	90.5042	9.5	8.4	0.8	0.3	0.756303
PB2	#	431-439	1190	0.1	MHQLLRHFQ	98.8235	1.2	0.3	0.5	0.4	0.756303
PB2	#	432-440	1190	0.1	HQLLRHFQK	98.7395	1.3	0.3	0.5	0.5	0.840336
PB2	#	433-441	1190	0.1	QLLRHFQKD	98.4874	1.5	0.6	0.6	0.3	0.672269
PB2	#	434-442	1190	0.2	LLRHFQKDA	98.2353	1.8	0.6	0.8	0.3	0.756303
PB2	#	435-443	1190	0.3	LRHFQKDAK	96.7227	3.3	1.4	1.4	0.4	0.92437
PB2	#	436-444	1190	0.3	RHFQKDAKV	96.6387	3.4	1.4	1.6	0.3	0.92437
PB2	#	437-445	1190	0.3	HFQKDAKVL	96.8067	3.2	1.4	1.4	0.3	0.840336
PB2	#	438-446	1191	0.3	FQKDAKVLF	96.5575	3.4	1.4	1.5	0.5	1.00756
PB2	#	439-447	1191	0.3	QKDAKVLFQ	96.3896	3.6	1.4	1.5	0.7	1.17548
PB2	#	440-448	1190	0.4	KDAKVLFQN	95.5462	4.5	1.4	2.3	0.8	1.42857
PB2	#	441-449	1190	0.4	DAKVLFQNW	95.5462	4.5	1.4	2.3	0.8	1.42857
PB2	#	442-450	1190	0.4	AKVLFQNWG	96.1345	3.9	1.4	1.7	0.8	1.34454
PB2	&	443-451	1190	1.2	KVLFQNWGI	69.6639	30.3	26.2	3.3	0.8	1.51261
PB2	&	444-452	1190	1.1	VLFQNWGIE	71.1765	28.8	26.2	1.8	0.8	1.34454
PB2	&	445-453	1189	1.2	LFQNWGIEP	70.143	29.9	25.5	3.3	1.1	1.85029
PB2	&	446-454	1189	1.2	FQNWGIEPI	70.143	29.9	25.2	3.4	1.2	2.0185
PB2	&	447-455	1189	1.2	QNWGIEPID	70.3112	29.7	25.2	3.4	1	1.85029
PB2	&	448-456	1189	1.4	NWGIEPIDN	69.386	30.6	23.9	5.7	1	2.10261
PB2	&	449-457	1190	1.3	WGIEPIDNV	69.5798	30.4	24.3	5.1	1	1.93277
PB2	&	450-458	1190	1.3	GIEPIDNVM	69.5798	30.4	24.4	5.1	0.9	1.84874
PB2	&	451-459	1190	1.3	IEPIDNVMG	69.5798	30.4	24.4	5.1	0.9	1.84874
PB2	#	452-460	1190	0.5	EPIDNVMGM	94.1176	5.9	1.6	3.8	0.5	1.2605
PB2	#	453-461	1189	0.6	PIDNVMGMI	92.0101	8	2.1	5.4	0.5	1.34567
PB2	#	454-462	1190	0.5	IDNVMGMIG	94.2017	5.8	2.1	3.2	0.5	1.09244
PB2	#	455-463	1191	0.8	DNVMGMIGI	90.2603	9.7	3.1	6	0.6	1.42737
PB2	#	456-464	1191	0.7	NVMGMIGIL	90.3442	9.7	3	6	0.6	1.42737
PB2	#	457-465	1191	0.5	VMGMIGILP	92.5273	7.5	3.3	3.6	0.6	1.17548
PB2	#	458-466	1191	0.6	MGMIGILPD	92.5273	7.5	3.3	3.6	0.6	1.17548
PB2	#	459-467	1191	0.7	GMIGILPDM	90.1763	9.8	3.3	5.9	0.7	1.34341
PB2	#	460-468	1192	0.7	MIGILPDMT	90.1007	9.9	3.3	5.9	0.8	1.42617
PB2	#	461-469	1192	0.7	IGILPDMTP	90.1846	9.8	3.4	5.7	0.8	1.34228
PB2	#	462-470	1193	0.6	GILPDMTPS	92.0369	8	3.4	3.8	0.8	1.34116
PB2	#	463-471	1193	0.7	ILPDMTPST	91.1148	8.9	2.4	5.7	0.8	1.42498
PB2	#	464-472	1193	0.4	LPDMTPSTE	94.4677	5.5	2.3	2.4	0.8	1.25733
PB2	&	465-473	1193	1.3	PDMTPSTEM	78.9606	21	8.5	11.7	0.8	1.59262
PB2	&	466-474	1193	1.2	DMTPSTEMS	79.1282	20.9	8.5	11.7	0.7	1.42498
PB2	&	467-475	1193	1.3	MTPSTEMSL	78.793	21.2	8.5	12	0.7	1.42498
PB2	&	468-476	1193	1.1	TPSTEMSLR	81.0562	18.9	8.5	9.9	0.5	1.17351
PB2	&	469-477	1193	1.3	PSTEMSLRG	77.6194	22.4	8.5	13.3	0.5	1.25733
PB2	&	470-478	1193	1.5	STEMSLRGV	75.4401	24.6	8.5	15.5	0.5	1.59262
PB2	&	471-479	1195	1.5	TEMSLRGVR	75.3975	24.6	8.6	15.5	0.5	1.58996
PB2	&	472-480	1195	1.5	EMSLRGVRV	75.8996	24.1	8.5	15.1	0.6	1.75732
PB2	&	473-481	1195	1.5	MSLRGVRVS	75.9833	24	8.5	15	0.6	1.67364
PB2	#	474-482	1197	0.7	SLRGVRVSK	90.8104	9.2	3.1	5.4	0.7	1.16959
PB2	&	475-483	1197	1.2	LRGVRVSKM	80.3676	19.6	10	8.9	0.8	1.5873
PB2	&	476-484	1197	1.1	RGVRVSKMG	80.9524	19	10	8.4	0.7	1.42022
PB2	&	477-485	1198	1.2	GVRVSKMGV	80.3005	19.7	10	8.8	0.8	1.66945
PB2	&	478-486	1198	1.1	VRVSKMGVD	80.217	19.8	13.2	5.7	0.9	1.58598
PB2	&	479-487	1198	0.9	RVSKMGVDE	82.7212	17.3	13.4	3	0.9	1.41903
PB2	&	480-488	1199	0.9	VSKMGVDEY	82.9024	17.1	13.3	3	0.8	1.25104
PB2	&	481-489	1200	0.8	SKMGVDEYS	83.5833	16.4	13.8	2	0.6	1
PB2	&	482-490	1200	0.9	KMGVDEYSS	83	17	13.8	2.6	0.6	1.08333
PB2	&	483-491	1200	0.9	MGVDEYSST	82.6667	17.3	13.8	2.9	0.7	1.16667
PB2	#	484-492	1200	0.3	GVDEYSSTE	97	3	0.8	1.7	0.6	0.916667
PB2	#	485-493	1200	0.3	VDEYSSTER	96.0833	3.9	0.9	2.4	0.6	1
PB2	#	486-494	1199	0.6	DEYSSTERV	90.4921	9.5	6.3	2.7	0.5	1.00083
PB2	&	487-495	1199	0.9	EYSSTERVV	85.2377	14.8	6.3	8	0.4	1.16764
PB2	&	488-496	1199	1	YSSTERVVV	85.1543	14.8	6.3	8.2	0.3	1.25104
PB2	&	489-497	1199	1.1	SSTERVVVS	83.3194	16.7	6.3	10	0.3	1.41785
PB2	&	490-498	1199	1	STERVVVSI	83.9867	16	6.5	9	0.5	1.41785
PB2	&	491-499	1199	1	TERVVVSID	84.4037	15.6	6.5	8.7	0.4	1.33445
PB2	&	492-500	1200	1	ERVVVSIDR	84.75	15.3	6.5	8.3	0.4	1.25
PB2	&	493-501	1200	1	RVVVSIDRF	84.6667	15.3	6.5	8.3	0.5	1.33333
PB2	&	494-502	1200	0.9	VVVSIDRFL	85.5833	14.4	6.5	7.4	0.5	1.25
PB2	#	495-503	1203	0.6	VVSIDRFLR	91.4381	8.6	4.1	3.7	0.7	1.41313
PB2	#	496-504	1203	0.4	VSIDRFLRV	95.6775	4.3	1.2	2.6	0.6	1.24688
PB2	#	497-505	1203	0.4	SIDRFLRVR	95.9268	4.1	1.2	2.4	0.5	1.24688
PB2	#	498-506	1203	0.2	IDRFLRVRD	97.6725	2.3	0.7	1.2	0.5	1.08063
PB2	#	499-507	1203	0.2	DRFLRVRDQ	97.9219	2.1	0.6	1	0.5	0.997506
PB2	#	500-508	1202	0.4	RFLRVRDQR	94.6755	5.3	3.2	1.3	0.7	1.24792
PB2	#	501-509	1203	0.4	FLRVRDQRG	94.7631	5.2	3.3	1.2	0.7	1.16376
PB2	#	502-510	1203	0.4	LRVRDQRGN	94.8462	5.2	3.3	1.2	0.7	1.08063
PB2	#	503-511	1203	0.5	RVRDQRGNV	93.7656	6.2	3.2	2.3	0.7	1.33001
PB2	#	504-512	1203	0.4	VRDQRGNVL	94.3475	5.7	3.2	1.7	0.7	1.24688
PB2	#	505-513	1203	0.4	RDQRGNVLL	94.5968	5.4	3.2	1.6	0.7	1.08063
PB2	#	506-514	1203	0.4	DQRGNVLLS	94.8462	5.2	3.2	1.2	0.8	1.08063
PB2	#	507-515	1203	0.4	QRGNVLLSP	94.8462	5.2	3.2	1.2	0.8	1.08063
PB2	#	508-516	1203	0.4	RGNVLLSPE	94.8462	5.2	3.2	1.2	0.8	1.08063
PB2	#	509-517	1202	0.2	GNVLLSPEE	98.0865	1.9	1.2	0	0.7	0.831947
PB2	#	510-518	1202	0.2	NVLLSPEEV	98.0033	2	1.2	0.2	0.7	0.831947
PB2	#	511-519	1200	0.2	VLLSPEEVS	98	2	1.2	0.2	0.7	0.833333
PB2	#	512-520	1200	0.1	LLSPEEVSE	99.1667	0.8	0.2	0	0.7	0.75
PB2	#	513-521	1199	0.2	LSPEEVSET	97.6647	2.3	0.8	0.8	0.7	0.917431
PB2	#	514-522	1199	0.3	SPEEVSETQ	97.3311	2.7	0.8	1.1	0.8	1.08424
PB2	#	515-523	1199	0.2	PEEVSETQG	97.4145	2.6	0.8	1.1	0.7	1.00083
PB2	#	516-524	1199	0.3	EEVSETQGT	96.2469	3.8	0.8	2.1	0.8	1.33445
PB2	#	517-525	1198	0.4	EVSETQGTE	96.1603	3.8	0.8	2.1	0.9	1.41903
PB2	#	518-526	1198	0.5	VSETQGTEK	94.7412	5.3	1.5	2.6	1.2	1.66945
PB2	#	519-527	1199	0.5	SETQGTEKL	94.7456	5.3	1.6	2.7	1	1.50125
PB2	#	520-528	1199	0.5	ETQGTEKLT	94.412	5.6	1.6	2.8	1.2	1.75146
PB2	#	521-529	1199	0.5	TQGTEKLTI	94.4954	5.5	1.6	2.8	1.1	1.66806
PB2	#	522-530	1200	0.4	QGTEKLTIT	95.8333	4.2	1.7	1.6	0.9	1.33333
PB2	#	523-531	1200	0.3	GTEKLTITY	96.0833	3.9	1.7	1.3	0.9	1.25
PB2	#	524-532	1200	0.4	TEKLTITYS	95.6667	4.3	1.7	1.8	0.9	1.41667
PB2	#	525-533	1201	0.3	EKLTITYSS	96.836	3.2	1.7	0.6	0.8	1.1657
PB2	#	526-534	1203	0.3	KLTITYSSS	95.9268	4.1	1.7	1.7	0.6	0.997506
PB2	#	527-535	1205	0.2	LTITYSSSM	97.6763	2.3	1.2	0.6	0.6	0.912863
PB2	#	528-536	1204	0.2	TITYSSSMM	97.5914	2.4	1.2	0.6	0.7	0.996678
PB2	#	529-537	1203	0.2	ITYSSSMMW	97.8387	2.2	1.2	0.4	0.6	0.831255
PB2	#	530-538	1207	0.2	TYSSSMMWE	97.763	2.2	1.2	0.5	0.6	0.8285
PB2	#	531-539	1207	0.2	YSSSMMWEI	97.6802	2.3	1.2	0.5	0.7	0.91135
PB2	#	532-540	1209	0.2	SSSMMWEIN	97.5186	2.5	1.2	0.5	0.8	1.07527
PB2	#	533-541	1209	0.2	SSMMWEING	98.0149	2	1.2	0	0.8	0.909843
PB2	#	534-542	1209	0.2	SMMWEINGP	98.0976	1.9	1.2	0	0.7	0.82713
PB2	#	535-543	1209	0.1	MMWEINGPE	99.2556	0.7	0.1	0	0.7	0.744417
PB2	#	536-544	1209	0.1	MWEINGPES	99.3383	0.7	0.1	0	0.6	0.661704
PB2	#	537-545	1208	0.1	WEINGPESV	99.255	0.7	0.1	0	0.7	0.745033
PB2	#	538-546	1208	0.1	EINGPESVL	99.255	0.7	0.1	0	0.7	0.745033
PB2	#	539-547	1208	0.1	INGPESVLV	99.0066	1	0.3	0	0.7	0.745033
PB2	#	540-548	1209	0.1	NGPESVLVN	99.1729	0.8	0.3	0	0.5	0.578991
PB2	#	541-549	1209	0.1	GPESVLVNT	99.1729	0.8	0.3	0	0.5	0.578991
PB2	#	542-550	1210	0.1	PESVLVNTY	99.1736	0.8	0.3	0	0.5	0.578512
PB2	#	543-551	1211	0.1	ESVLVNTYQ	99.1742	0.8	0.3	0	0.5	0.578035
PB2	#	544-552	1212	0.1	SVLVNTYQW	99.2574	0.7	0.3	0	0.4	0.49505
PB2	#	545-553	1214	0.2	VLVNTYQWI	98.3526	1.6	0.9	0.3	0.4	0.576606
PB2	#	546-554	1215	0.2	LVNTYQWII	98.3539	1.6	0.9	0.3	0.4	0.576132
PB2	#	547-555	1215	0.2	VNTYQWIIR	97.9424	2.1	0.9	0.8	0.3	0.576132
PB2	#	548-556	1215	0.2	NTYQWIIRN	97.8601	2.1	0.9	0.7	0.6	0.823045
PB2	#	549-557	1214	0.2	TYQWIIRNW	97.7759	2.2	0.9	0.7	0.7	0.906096
PB2	#	550-558	1214	0.2	YQWIIRNWE	97.8583	2.1	0.9	0.7	0.6	0.823723
PB2	#	551-559	1214	0.7	QWIIRNWET	90.0329	10	6.8	2.5	0.7	1.23558
PB2	&	552-560	1214	0.7	WIIRNWETV	89.1269	10.9	6.8	3.2	0.8	1.56507
PB2	&	553-561	1214	0.7	IIRNWETVK	89.1269	10.9	6.8	3.2	0.8	1.56507
PB2	&	554-562	1214	0.7	IRNWETVKI	89.5387	10.5	6.8	2.6	1	1.72982
PB2	&	555-563	1214	0.7	RNWETVKIQ	89.6211	10.4	6.8	2.6	0.9	1.64745
PB2	&	556-564	1214	0.7	NWETVKIQW	89.9506	10	6.8	2.6	0.7	1.40033
PB2	#	557-565	1214	0.6	WETVKIQWS	90.2801	9.7	6.9	2.2	0.6	1.15321
PB2	#	558-566	1215	0.6	ETVKIQWSQ	90.3704	9.6	6.9	2.2	0.5	1.06996
PB2	&	559-567	1215	0.7	TVKIQWSQD	89.465	10.5	6.7	3.2	0.6	1.31687
PB2	#	560-568	1215	0.3	VKIQWSQDP	97.2016	2.8	1	1.4	0.4	0.823045
PB2	#	561-569	1215	0.2	KIQWSQDPT	98.1893	1.8	1	0.5	0.3	0.493827
PB2	#	562-570	1215	0.4	IQWSQDPTM	94.8148	5.2	2.8	2	0.4	0.740741
PB2	#	563-571	1215	0.3	QWSQDPTML	95.3909	4.6	2.8	1.5	0.3	0.576132
PB2	#	564-572	1215	0.3	WSQDPTMLY	95.3909	4.6	2.8	1.5	0.3	0.576132
PB2	#	565-573	1215	0.3	SQDPTMLYN	95.3909	4.6	2.8	1.5	0.3	0.576132
PB2	#	566-574	1215	0.3	QDPTMLYNK	95.3909	4.6	2.8	1.5	0.3	0.576132
PB2	#	567-575	1215	0.4	DPTMLYNKM	94.4856	5.5	2.8	2.3	0.4	0.823045
PB2	#	568-576	1214	0.3	PTMLYNKME	95.5519	4.4	2.8	1.3	0.3	0.658979
PB2	#	569-577	1214	0.3	TMLYNKMEF	95.5519	4.4	2.8	1.3	0.3	0.658979
PB2	#	570-578	1214	0.4	MLYNKMEFE	95.3871	4.6	2.8	1.5	0.3	0.741351
PB2	#	571-579	1213	0.2	LYNKMEFEP	97.3619	2.6	1.4	1	0.2	0.577082
PB2	#	572-580	1213	0.2	YNKMEFEPF	97.2795	2.7	1.4	1	0.3	0.659522
PB2	#	573-581	1213	0.2	NKMEFEPFQ	97.2795	2.7	1.4	1	0.3	0.659522
PB2	#	574-582	1213	0.3	KMEFEPFQS	97.0322	3	1.4	1.2	0.4	0.824402
PB2	#	575-583	1213	0.2	MEFEPFQSL	97.1146	2.9	1.4	1.2	0.3	0.741962
PB2	#	576-584	1213	0.3	EFEPFQSLV	95.3009	4.7	2.6	1.7	0.3	0.659522
PB2	#	577-585	1213	0.4	FEPFQSLVP	95.0536	4.9	2.6	1.7	0.6	0.906843
PB2	#	578-586	1212	0.4	EPFQSLVPK	94.802	5.2	2.6	2	0.6	0.990099
PB2	#	579-587	1212	0.4	PFQSLVPKA	94.7195	5.3	2.6	2	0.7	1.07261
PB2	&	580-588	1213	0.8	FQSLVPKAA	86.5622	13.4	8	4.6	0.8	1.40148
PB2	&	581-589	1214	0.8	QSLVPKAAR	86.4086	13.6	8	4.8	0.8	1.4827
PB2	&	582-590	1214	1.2	SLVPKAARG	81.2191	18.8	7.4	10.6	0.7	1.72982
PB2	&	583-591	1215	1.2	LVPKAARGQ	80.9877	19	7.4	10.6	1	1.97531
PB2	&	584-592	1216	1.2	VPKAARGQY	81.0855	18.9	7.4	10.6	0.9	1.89145
PB2	&	585-593	1216	1	PKAARGQYS	83.6349	16.4	7.4	8.2	0.7	1.5625
PB2	&	586-594	1218	1	KAARGQYSG	83.908	16.1	7.4	8.2	0.5	1.31363
PB2	&	587-595	1220	1	AARGQYSGF	84.1803	15.8	7.4	8	0.5	1.22951
PB2	&	588-596	1220	1	ARGQYSGFV	84.4262	15.6	7.4	7.8	0.4	1.06557
PB2	#	589-597	1220	0.5	RGQYSGFVR	93.4426	6.6	3	3.3	0.3	0.655738
PB2	#	590-598	1220	0.5	GQYSGFVRT	93.3607	6.6	3	3.4	0.3	0.655738
PB2	#	591-599	1220	0.1	QYSGFVRTL	99.1803	0.8	0.2	0.4	0.2	0.409836
PB2	#	592-600	1220	<1	YSGFVRTLF	99.6721	0.3	0.2	0	0.1	0.163934
PB2	#	593-601	1220	<1	SGFVRTLFQ	99.5902	0.4	0.2	0	0.2	0.245902
PB2	#	594-602	1220	0.1	GFVRTLFQQ	99.5082	0.5	0.2	0	0.2	0.327869
PB2	#	595-603	1220	0.1	FVRTLFQQM	99.4262	0.6	0.2	0	0.3	0.409836
PB2	#	596-604	1220	0.1	VRTLFQQMR	99.2623	0.7	0.2	0	0.5	0.57377
PB2	#	597-605	1220	0.1	RTLFQQMRD	99.2623	0.7	0.2	0	0.5	0.57377
PB2	#	598-606	1220	0.2	TLFQQMRDV	97.377	2.6	1.9	0.2	0.5	0.655738
PB2	#	599-607	1220	0.3	LFQQMRDVL	96.8852	3.1	1.9	0.7	0.5	0.819672
PB2	#	600-608	1222	0.3	FQQMRDVLG	96.8085	3.2	1.9	0.7	0.6	0.900164
PB2	#	601-609	1222	0.3	QQMRDVLGT	96.8085	3.2	1.9	0.7	0.6	0.900164
PB2	#	602-610	1222	0.3	QMRDVLGTF	96.6448	3.4	1.9	1	0.5	0.900164
PB2	#	603-611	1222	0.3	MRDVLGTFD	96.3175	3.7	1.9	1.3	0.5	0.981997
PB2	#	604-612	1222	0.3	RDVLGTFDT	96.2357	3.8	1.9	1.5	0.4	0.981997
PB2	#	605-613	1222	0.4	DVLGTFDTV	94.8445	5.2	1.9	3	0.2	0.900164
PB2	#	606-614	1214	0.4	VLGTFDTVQ	94.8105	5.2	1.9	3	0.2	0.906096
PB2	#	607-615	1213	0.4	LGTFDTVQI	95.0536	4.9	1.6	3	0.4	1.07172
PB2	#	608-616	1213	0.4	GTFDTVQII	95.4658	4.5	1.6	2.7	0.2	0.906843
PB2	#	609-617	1213	0.4	TFDTVQIIK	95.4658	4.5	1.6	2.7	0.2	0.906843
PB2	#	610-618	1213	0.5	FDTVQIIKL	93.9819	6	1.5	4.3	0.2	1.07172
PB2	#	611-619	1213	0.5	DTVQIIKLL	94.2292	5.8	1.5	4	0.2	0.989283
PB2	#	612-620	1214	0.4	TVQIIKLLP	94.6458	5.4	1.5	3.7	0.2	0.823723
PB2	#	613-621	1214	0.4	VQIIKLLPF	94.8929	5.1	1.5	3.5	0.1	0.658979
PB2	#	614-622	1214	0.4	QIIKLLPFA	94.3987	5.6	1.8	3.7	0.1	0.576606
PB2	#	615-623	1214	0.5	IIKLLPFAA	94.0692	5.9	1.8	4	0.2	0.741351
PB2	#	616-624	1215	0.3	IKLLPFAAA	95.7202	4.3	1.8	2.3	0.2	0.576132
PB2	#	617-625	1215	0.3	KLLPFAAAP	96.0494	4	1.8	2	0.2	0.411523
PB2	#	618-626	1215	0.3	LLPFAAAPP	95.8848	4.1	1.8	2.1	0.2	0.493827
PB2	&	619-627	1215	0.9	LPFAAAPPE	75.4733	24.5	22.1	2.2	0.2	0.493827
PB2	&	620-628	1215	1	PFAAAPPEQ	75.0617	24.9	22	2.7	0.2	0.823045
PB2	&	621-629	1215	1.1	FAAAPPEQS	73.6626	26.3	22	4.1	0.2	0.90535
PB2	&	622-630	1214	1.2	AAAPPEQSR	72.9819	27	21.5	5.1	0.4	1.23558
PB2	&	623-631	1213	1.1	AAPPEQSRM	74.6084	25.4	21.4	3.3	0.7	1.40148
PB2	&	624-632	1212	1.1	APPEQSRMQ	74.835	25.2	21.5	3	0.7	1.40264
PB2	&	625-633	1210	1.1	PPEQSRMQF	74.7934	25.2	21.3	3.1	0.7	1.4876
PB2	&	626-634	1206	1.1	PEQSRMQFS	74.8756	25.1	21.1	3.3	0.7	1.57546
PB2	&	627-635	1205	1.1	EQSRMQFSS	74.7718	25.2	21.1	3.5	0.7	1.57676
PB2	#	628-636	1205	0.4	QSRMQFSSL	95.7676	4.2	1.1	2.5	0.7	1.41079
PB2	#	629-637	1205	0.4	SRMQFSSLT	95.9336	4.1	1.2	2.2	0.7	1.3278
PB2	#	630-638	1205	0.3	RMQFSSLTV	96.5145	3.5	2	0.8	0.7	1.16183
PB2	#	631-639	1206	0.2	MQFSSLTVN	98.5075	1.5	0.2	0.7	0.7	1.07794
PB2	#	632-640	1206	0.2	QFSSLTVNV	98.5904	1.4	0.2	0.5	0.7	1.07794
PB2	#	633-641	1206	0.2	FSSLTVNVR	98.2587	1.7	0.2	0.8	0.7	1.16086
PB2	#	634-642	1206	0.1	SSLTVNVRG	98.5904	1.4	0.2	0.7	0.5	0.912106
PB2	#	635-643	1210	0.2	SLTVNVRGS	98.595	1.4	0.2	0.5	0.7	0.991736
PB2	#	636-644	1205	0.2	LTVNVRGSG	98.5892	1.4	0.2	0.5	0.7	0.995851
PB2	#	637-645	1205	0.2	TVNVRGSGM	98.3402	1.7	0.2	0.9	0.5	0.995851
PB2	#	638-646	1204	0.2	VNVRGSGMR	98.3389	1.7	0.2	0.9	0.5	0.996678
PB2	#	639-647	1204	0.2	NVRGSGMRI	98.1728	1.8	0.2	0.9	0.7	1.16279
PB2	#	640-648	1204	0.3	VRGSGMRIL	97.2591	2.7	0.6	1.5	0.7	1.41196
PB2	&	641-649	1203	1.1	RGSGMRILV	68.4954	31.5	28.4	2.6	0.5	1.57938
PB2	&	642-650	1202	1.1	GSGMRILVR	68.9684	31	28.4	2.2	0.5	1.41431
PB2	&	643-651	1201	1.1	SGMRILVRG	69.0258	31	28.3	2.2	0.5	1.41549
PB2	&	644-652	1201	1.1	GMRILVRGN	68.776	31.2	28.3	2.5	0.4	1.49875
PB2	&	645-653	1201	1.1	MRILVRGNS	68.776	31.2	28.3	2.3	0.6	1.58201
PB2	&	646-654	1201	1.1	RILVRGNSP	69.1923	30.8	28.2	1.9	0.7	1.49875
PB2	&	647-655	1202	1.2	ILVRGNSPV	68.1364	31.9	28.4	2.7	0.7	1.4975
PB2	&	648-656	1202	1.1	LVRGNSPVF	68.3028	31.7	28.4	2.7	0.6	1.33111
PB2	&	649-657	1202	1.1	VRGNSPVFN	68.7188	31.3	28.7	2	0.6	1.08153
PB2	#	650-658	1203	0.2	RGNSPVFNY	97.2569	2.7	1.2	1	0.5	0.914381
PB2	#	651-659	1204	0.3	GNSPVFNYN	96.4286	3.6	1.2	1.7	0.7	1.16279
PB2	#	652-660	1204	0.4	NSPVFNYNK	95.6811	4.3	1.2	2.3	0.7	1.3289
PB2	#	653-661	1204	0.5	SPVFNYNKA	94.8505	5.1	0.9	3.5	0.7	1.41196
PB2	#	654-662	1204	0.5	PVFNYNKAT	94.4352	5.6	0.9	3.8	0.8	1.49502
PB2	#	655-663	1204	0.6	VFNYNKATK	93.2724	6.7	0.9	5	0.8	1.74419
PB2	#	656-664	1202	0.6	FNYNKATKR	93.594	6.4	1.7	3.7	1	1.74709
PB2	#	657-665	1201	0.6	NYNKATKRL	93.5887	6.4	1.7	3.7	1	1.74854
PB2	#	658-666	1201	0.6	YNKATKRLT	93.3389	6.7	1.6	4	1.1	1.91507
PB2	#	659-667	1201	0.8	NKATKRLTV	90.0083	10	3.7	5.2	1	1.99833
PB2	#	660-668	1200	0.7	KATKRLTVL	90.75	9.3	3.8	4.5	1	1.91667
PB2	#	661-669	1198	0.7	ATKRLTVLG	91.2354	8.8	3.8	4.2	0.8	1.75292
PB2	#	662-670	1198	0.6	TKRLTVLGK	92.404	7.6	4.5	2.3	0.8	1.41903
PB2	#	663-671	1198	0.5	KRLTVLGKD	92.7379	7.3	4.5	2.1	0.7	1.33556
PB2	#	664-672	1197	0.4	RLTVLGKDA	93.8179	6.2	4.5	1	0.7	1.08605
PB2	#	665-673	1199	0.4	LTVLGKDAG	93.9116	6.1	4.5	1	0.6	1.00083
PB2	#	666-674	1199	0.5	TVLGKDAGA	93.578	6.4	4.5	1.3	0.6	1.08424
PB2	#	667-675	1199	0.4	VLGKDAGAL	93.995	6	4.4	1.2	0.4	0.917431
PB2	#	668-676	1199	0.3	LGKDAGALT	96.2469	3.8	1.7	1.5	0.6	1.16764
PB2	#	669-677	1197	0.4	GKDAGALTE	95.4052	4.6	1.7	2.3	0.6	1.25313
PB2	#	670-678	1198	0.4	KDAGALTED	95.576	4.4	1.7	2	0.8	1.33556
PB2	#	671-679	1198	0.5	DAGALTEDP	94.9082	5.1	1.7	2.7	0.8	1.5025
PB2	#	672-680	1199	0.6	AGALTEDPD	93.7448	6.3	1.7	3.7	0.9	1.75146
PB2	#	673-681	1199	0.6	GALTEDPDE	93.4946	6.5	1.7	3.9	0.9	1.83486
PB2	#	674-682	1199	0.6	ALTEDPDEG	93.578	6.4	1.7	3.9	0.8	1.75146
PB2	#	675-683	1200	0.6	LTEDPDEGT	93.3333	6.7	1.7	4.1	0.9	1.91667
PB2	&	676-684	1200	0.9	TEDPDEGTA	89.25	10.8	3.6	6.2	1	2.25
PB2	#	677-685	1200	0.7	EDPDEGTAG	91.25	8.8	3.6	4.7	0.5	1.66667
PB2	#	678-686	1201	0.6	DPDEGTAGV	92.0899	7.9	3.6	3.6	0.7	1.66528
PB2	#	679-687	1201	0.6	PDEGTAGVE	92.2565	7.7	3.6	3.6	0.6	1.49875
PB2	#	680-688	1200	0.6	DEGTAGVES	92.8333	7.2	3.6	2.9	0.7	1.41667
PB2	#	681-689	1200	0.4	EGTAGVESA	94.0833	5.9	3.7	1.9	0.3	0.916667
PB2	#	682-690	1200	0.4	GTAGVESAV	94.4167	5.6	3.7	1.7	0.3	0.75
PB2	#	683-691	1200	0.4	TAGVESAVL	94.4167	5.6	3.7	1.7	0.3	0.75
PB2	#	684-692	1200	0.3	AGVESAVLR	95.1667	4.8	3.7	0.9	0.3	0.666667
PB2	#	685-693	1201	0.1	GVESAVLRG	99.4172	0.6	0.2	0.2	0.2	0.41632
PB2	#	686-694	1198	0.1	VESAVLRGF	99.4992	0.5	0.2	0	0.3	0.417362
PB2	#	687-695	1199	<1	ESAVLRGFL	99.583	0.4	0.2	0	0.3	0.333611
PB2	#	688-696	1196	0.1	SAVLRGFLI	99.2475	0.8	0.3	0.2	0.3	0.41806
PB2	#	689-697	1195	0.1	AVLRGFLIL	98.4937	1.5	0.8	0.5	0.3	0.502092
PB2	#	690-698	1193	0.2	VLRGFLILG	98.4074	1.6	0.8	0.5	0.3	0.586756
PB2	#	691-699	1192	0.3	LRGFLILGK	97.1477	2.9	0.8	1.8	0.3	0.838926
PB2	#	692-700	1192	0.3	RGFLILGKE	97.1477	2.9	0.8	1.8	0.3	0.838926
PB2	#	693-701	1191	0.3	GFLILGKED	96.8934	3.1	0.8	2	0.3	0.923594
PB2	#	694-702	1191	0.4	FLILGKEDK	94.7103	5.3	2.2	2.7	0.4	1.09152
PB2	#	695-703	1191	0.4	LILGKEDKR	94.7103	5.3	2.2	2.7	0.4	1.09152
PB2	#	696-704	1191	0.4	ILGKEDKRY	94.7103	5.3	2.2	2.7	0.4	1.09152
PB2	#	697-705	1191	0.4	LGKEDKRYG	94.9622	5	2.2	2.4	0.5	1.09152
PB2	#	698-706	1191	0.3	GKEDKRYGP	95.7179	4.3	2.3	1.7	0.3	0.839631
PB2	#	699-707	1191	0.4	KEDKRYGPA	95.55	4.5	2.2	1.9	0.3	0.923594
PB2	#	700-708	1191	0.2	EDKRYGPAL	96.8934	3.1	2.2	0.6	0.3	0.671704
PB2	#	701-709	1189	0.2	DKRYGPALS	96.9722	3	2.2	0.6	0.3	0.58873
PB2	#	702-710	1190	0.2	KRYGPALSI	97.2269	2.8	2.2	0.3	0.3	0.504202
PB2	#	703-711	1190	0.3	RYGPALSIN	96.3866	3.6	2.9	0.3	0.4	0.588235
PB2	#	704-712	1190	0.3	YGPALSINE	96.3866	3.6	2.9	0.3	0.4	0.588235
PB2	#	705-713	1190	0.3	GPALSINEL	95.9664	4	2.9	0.7	0.5	0.756303
PB2	#	706-714	1190	0.4	PALSINELS	94.7899	5.2	2.9	1.8	0.6	1.0084
PB2	#	707-715	1190	0.5	ALSINELSN	93.1933	6.8	2.9	3.1	0.8	1.42857
PB2	#	708-716	1190	0.6	LSINELSNL	92.1849	7.8	2.9	4	0.9	1.51261
PB2	#	709-717	1189	0.8	SINELSNLA	90.2439	9.8	2.8	6	1	1.76619
PB2	&	710-718	1189	0.8	INELSNLAK	89.9916	10	2.8	6.2	1	1.85029
PB2	&	711-719	1188	0.8	NELSNLAKG	89.899	10.1	2.8	6.4	0.9	1.85185
PB2	#	712-720	1187	0.6	ELSNLAKGE	92.5864	7.4	1.9	4.7	0.8	1.76917
PB2	#	713-721	1187	0.7	LSNLAKGEK	91.9966	8	1.9	5.2	0.9	1.93766
PB2	#	714-722	1187	0.7	SNLAKGEKA	91.9124	8.1	1.9	5.1	1.2	2.1904
PB2	#	715-723	1186	0.6	NLAKGEKAN	93.0017	7	1.9	3.9	1.3	2.10793
PB2	#	716-724	1186	0.5	LAKGEKANV	94.1821	5.8	1.9	2.7	1.2	1.77066
PB2	#	717-725	1186	0.4	AKGEKANVL	95.3626	4.6	1.9	1.3	1.4	1.93929
PB2	#	718-726	1185	0.3	KGEKANVLI	97.0464	3	0.4	1	1.5	1.94093
PB2	#	719-727	1185	0.4	GEKANVLIG	95.7806	4.2	1.4	1.4	1.5	2.02532
PB2	#	720-728	1186	0.4	EKANVLIGQ	95.8685	4.1	1.3	1.2	1.6	2.02361
PB2	#	721-729	1186	0.4	KANVLIGQG	95.6998	4.3	1.3	1.5	1.5	2.10793
PB2	#	722-730	1186	0.4	ANVLIGQGD	96.2901	3.7	1.3	1.1	1.3	1.85497
PB2	#	723-731	1183	0.4	NVLIGQGDV	96.2806	3.7	1.3	1.4	1.1	1.60609
PB2	#	724-732	1183	0.3	VLIGQGDVV	96.4497	3.6	1.3	1.4	0.9	1.43702
PB2	#	725-733	1183	0.3	LIGQGDVVL	96.7033	3.3	1.3	1.4	0.7	1.18343
PB2	#	726-734	1183	0.3	IGQGDVVLV	97.0414	3	1.3	1.1	0.6	1.01437
PB2	#	727-735	1182	0.3	GQGDVVLVM	97.1235	2.9	1.4	1	0.5	1.01523
PB2	#	728-736	1176	0.1	QGDVVLVMK	98.6395	1.4	0.3	0.5	0.5	0.85034
PB2	#	729-737	1175	0.2	GDVVLVMKR	98.4681	1.5	0.3	0.7	0.5	0.93617
PB2	#	730-738	1174	0.2	DVVLVMKRK	98.552	1.4	0.3	0.7	0.4	0.851789
PB2	#	731-739	1174	0.2	VVLVMKRKR	98.3816	1.6	0.3	0.9	0.4	0.936968
PB2	#	732-740	1171	0.2	VLVMKRKRD	98.2921	1.7	0.5	0.9	0.3	0.853971
PB2	#	733-741	1168	0.2	LVMKRKRDS	97.774	2.2	0.5	1.4	0.3	0.941781
PB2	#	734-742	1167	0.2	VMKRKRDSS	97.7721	2.2	0.5	1.4	0.3	0.942588
PB2	#	735-743	1150	0.2	MKRKRDSSI	97.3913	2.6	0.5	1.8	0.3	0.956522
PB2	#	736-744	1133	0.2	KRKRDSSIL	97.5287	2.5	0.5	1.5	0.4	0.970874
PB2	#	737-745	1115	0.3	RKRDSSILT	96.7713	3.2	0.7	2.1	0.4	1.07623
PB2	#	738-746	1109	0.3	KRDSSILTD	97.0243	3	0.7	1.9	0.4	0.901713
PB2	#	739-747	1095	0.3	RDSSILTDS	97.0776	2.9	0.7	1.6	0.5	1.00457
PB2	#	740-748	1076	0.3	DSSILTDSQ	97.2119	2.8	0.7	1.5	0.6	0.929368
PB2	#	741-749	1061	0.2	SSILTDSQT	97.738	2.3	0.8	0.9	0.6	0.848256
PB2	#	742-750	1057	0.2	SILTDSQTA	98.2971	1.7	0.8	0.5	0.5	0.662252
PB2	#	743-751	1054	0.2	ILTDSQTAT	98.1025	1.9	0.8	0.7	0.5	0.759013
PB2	#	744-752	1043	0.1	LTDSQTATK	98.466	1.5	0.8	0	0.8	0.862895
PB2	#	745-753	1030	0.2	TDSQTATKR	98.3495	1.7	0.8	0	0.9	0.970874
PB2	#	746-754	998	0.2	DSQTATKRI	98.5972	1.4	0.3	0.2	0.9	1.1022
PB2	#	747-755	992	0.2	SQTATKRIR	98.0847	1.9	0.3	0.7	0.9	1.31048
PB2	#	748-756	974	0.3	QTATKRIRM	97.1253	2.9	0.4	1.5	0.9	1.64271
PB2	#	749-757	968	0.3	TATKRIRMA	96.9008	3.1	0.4	1.5	1.1	1.8595
PB2	#	750-758	945	0.4	ATKRIRMAI	95.9788	4	0.4	2.5	1.1	2.1164
PB2	#	751-759	928	0.5	TKRIRMAIN	94.5043	5.5	1.1	3	1.4	2.58621
PB1	#	1-9	835	0.2	MDVNPTLLF	97.96	2	0.2	1	0.8	1.4
PB1	#	2-10	844	0.2	DVNPTLLFL	97.63	2.4	0.2	1.2	0.9	1.7
PB1	#	3-11	867	0.2	VNPTLLFLK	97.92	2.1	0.2	0.9	0.9	1.5
PB1	#	4-12	869	0.4	NPTLLFLKV	96.09	3.9	1.7	1.2	1	1.7
PB1	#	5-13	876	0.3	PTLLFLKVP	96.35	3.7	1.7	0.9	1	1.6
PB1	&	6-14	889	1	TLLFLKVPV	79.53	20.5	16.9	2.5	1.1	1.8
PB1	&	7-15	898	0.9	LLFLKVPVQ	79.84	20.2	16.7	2.2	1.2	1.8
PB1	&	8-16	913	0.9	LFLKVPVQN	80.07	19.9	16.5	2.3	1.1	1.6
PB1	&	9-17	912	0.9	FLKVPVQNA	80.59	19.4	16.4	1.8	1.2	1.5
PB1	&	10-18	913	0.9	LKVPVQNAI	80.72	19.3	16.4	1.8	1.1	1.4
PB1	&	11-19	918	0.9	KVPVQNAIS	80.94	19.1	16.3	1.5	1.2	1.4
PB1	&	12-20	930	0.9	VPVQNAIST	80.86	19.1	16.1	1.7	1.3	1.6
PB1	&	13-21	939	0.7	PVQNAISTT	82.64	17.4	16.3	0.2	0.9	1.1
PB1	&	14-22	942	0.7	VQNAISTTF	82.7	17.3	16.2	0.2	0.8	1.1
PB1	#	15-23	946	0.1	QNAISTTFP	98.94	1.1	0.3	0	0.7	0.8
PB1	#	16-24	949	0.1	NAISTTFPY	99.16	0.8	0.3	0	0.5	0.6
PB1	#	17-25	954	0.1	AISTTFPYT	99.27	0.7	0.3	0	0.4	0.5
PB1	#	18-26	966	<1	ISTTFPYTG	99.59	0.4	0.1	0	0.3	0.4
PB1	#	19-27	968	0.1	STTFPYTGD	99.28	0.7	0.1	0	0.6	0.7
PB1	#	20-28	969	0.1	TTFPYTGDP	99.28	0.7	0.1	0	0.6	0.7
PB1	#	21-29	969	<1	TFPYTGDPP	99.69	0.3	0.1	0	0.2	0.3
PB1	#	22-30	969	<1	FPYTGDPPY	99.69	0.3	0.1	0	0.2	0.3
PB1	#	23-31	970	<1	PYTGDPPYS	99.59	0.4	0.1	0	0.3	0.4
PB1	#	24-32	971	<1	YTGDPPYSH	99.59	0.4	0.1	0	0.3	0.4
PB1	#	25-33	971	<1	TGDPPYSHG	99.59	0.4	0.1	0	0.3	0.4
PB1	#	26-34	972	0.1	GDPPYSHGT	99.49	0.5	0.1	0	0.4	0.5
PB1	#	27-35	972	0.1	DPPYSHGTG	99.38	0.6	0.1	0	0.5	0.6
PB1	#	28-36	974	0.1	PPYSHGTGT	99.49	0.5	0.1	0	0.4	0.5
PB1	#	29-37	975	<1	PYSHGTGTG	99.59	0.4	0.1	0	0.3	0.4
PB1	#	30-38	977	0.1	YSHGTGTGY	99.18	0.8	0.4	0	0.4	0.5
PB1	#	31-39	977	0.1	SHGTGTGYT	98.98	1	0.4	0.2	0.4	0.6
PB1	#	32-40	977	0.2	HGTGTGYTM	98.26	1.7	0.7	0.6	0.4	0.7
PB1	#	33-41	977	0.2	GTGTGYTMD	98.26	1.7	0.7	0.6	0.4	0.7
PB1	#	34-42	977	0.2	TGTGYTMDT	98.26	1.7	0.7	0.6	0.4	0.7
PB1	#	35-43	977	0.2	GTGYTMDTV	98.16	1.8	0.7	0.8	0.3	0.7
PB1	#	36-44	977	0.2	TGYTMDTVN	97.75	2.3	0.7	1.2	0.3	0.8
PB1	#	37-45	977	0.2	GYTMDTVNR	97.75	2.3	0.7	1.2	0.3	0.8
PB1	#	38-46	977	0.2	YTMDTVNRT	97.75	2.3	0.7	1.2	0.3	0.8
PB1	#	39-47	977	0.2	TMDTVNRTH	98.16	1.8	0.7	0.8	0.3	0.7
PB1	#	40-48	978	0.2	MDTVNRTHQ	98.26	1.7	0.7	0.6	0.4	0.7
PB1	#	41-49	978	0.1	DTVNRTHQY	98.88	1.1	0.4	0.4	0.3	0.6
PB1	#	42-50	978	0.1	TVNRTHQYS	98.77	1.2	0.4	0.4	0.4	0.7
PB1	#	43-51	977	0.1	VNRTHQYSE	98.77	1.2	0.4	0.4	0.4	0.7
PB1	#	44-52	977	0.2	NRTHQYSEK	98.06	1.9	0.7	0.6	0.6	0.9
PB1	#	45-53	977	0.1	RTHQYSEKG	98.57	1.4	0.7	0.2	0.5	0.7
PB1	#	46-54	977	0.4	THQYSEKGK	94.88	5.1	1.7	2.7	0.7	1.2
PB1	#	47-55	977	0.4	HQYSEKGKW	94.88	5.1	1.7	2.7	0.7	1.2
PB1	#	48-56	977	0.5	QYSEKGKWT	94.17	5.8	1.7	3.3	0.8	1.5
PB1	&	49-57	977	0.9	YSEKGKWTT	86.59	13.4	6.7	5.8	0.9	2
PB1	&	50-58	976	0.9	SEKGKWTTN	86.58	13.4	6.7	5.8	0.9	2
PB1	&	51-59	976	0.9	EKGKWTTNT	86.27	13.7	6.7	6.3	0.8	2
PB1	&	52-60	980	1	KGKWTTNTE	86.22	13.8	6.6	6.2	0.9	2.1
PB1	&	53-61	980	0.9	GKWTTNTET	87.04	13	6.6	5.6	0.7	1.8
PB1	&	54-62	980	0.9	KWTTNTETG	86.53	13.5	6.6	6	0.8	2.1
PB1	#	55-63	980	0.6	WTTNTETGA	90.31	9.7	6.6	2.4	0.6	1.6
PB1	&	56-64	981	0.8	TTNTETGAP	87.77	12.2	6.5	4.5	1.2	2.1
PB1	&	57-65	981	0.8	TNTETGAPQ	87.97	12	6.7	4.3	1	1.8
PB1	#	58-66	981	0.4	NTETGAPQL	95.51	4.5	2.5	1.1	0.8	1.3
PB1	#	59-67	982	0.4	TETGAPQLN	95.62	4.4	2.4	1.1	0.8	1.3
PB1	#	60-68	982	0.3	ETGAPQLNP	96.03	4	2.3	0.7	0.9	1.3
PB1	#	61-69	982	0.3	TGAPQLNPI	95.93	4.1	2.3	0.9	0.8	1.3
PB1	#	62-70	982	0.4	GAPQLNPID	95.82	4.2	2.3	0.9	0.9	1.4
PB1	#	63-71	982	0.3	APQLNPIDG	96.33	3.7	2.3	0.5	0.8	1.1
PB1	#	64-72	982	0.3	PQLNPIDGP	96.23	3.8	2.3	0.5	0.9	1.2
PB1	#	65-73	982	0.2	QLNPIDGPL	98.47	1.5	0.4	0.2	0.9	1.1
PB1	#	66-74	982	0.1	LNPIDGPLP	98.98	1	0.2	0	0.8	0.9
PB1	#	67-75	982	0.2	NPIDGPLPE	97.76	2.2	1.3	0.2	0.7	0.9
PB1	#	68-76	982	0.4	PIDGPLPED	93.99	6	3.6	1.9	0.5	1
PB1	#	69-77	982	0.6	IDGPLPEDN	92.97	7	2.2	4.1	0.7	1.5
PB1	#	70-78	982	0.6	DGPLPEDNE	92.97	7	2.2	3.7	1.1	1.8
PB1	#	71-79	982	0.6	GPLPEDNEP	93.08	6.9	2.2	3.7	1	1.7
PB1	#	72-80	982	0.6	PLPEDNEPS	92.67	7.3	2.2	4	1.1	1.9
PB1	#	73-81	982	0.6	LPEDNEPSG	92.77	7.2	2.2	4	1	1.8
PB1	#	74-82	982	0.6	PEDNEPSGY	92.97	7	2.2	4	0.8	1.6
PB1	#	75-83	982	0.6	EDNEPSGYA	92.97	7	2.2	4	0.8	1.6
PB1	#	76-84	982	0.5	DNEPSGYAQ	93.58	6.4	2.4	3.1	0.9	1.4
PB1	#	77-85	982	0.3	NEPSGYAQT	96.33	3.7	1.7	1.3	0.6	1
PB1	#	78-86	982	0.1	EPSGYAQTD	98.98	1	0.3	0.3	0.4	0.6
PB1	#	79-87	982	0.1	PSGYAQTDC	99.39	0.6	0.3	0	0.3	0.4
PB1	#	80-88	982	0.1	SGYAQTDCV	99.39	0.6	0.3	0	0.3	0.4
PB1	#	81-89	981	<1	GYAQTDCVL	99.8	0.2	0.1	0	0.1	0.2
PB1	#	82-90	981	<1	YAQTDCVLE	99.8	0.2	0.1	0	0.1	0.2
PB1	#	83-91	981	<1	AQTDCVLEA	99.59	0.4	0.1	0	0.3	0.4
PB1	#	84-92	981	<1	QTDCVLEAM	99.59	0.4	0.1	0	0.3	0.4
PB1	#	85-93	981	<1	TDCVLEAMA	99.69	0.3	0.1	0	0.2	0.3
PB1	#	86-94	981	0.1	DCVLEAMAF	98.88	1.1	0.5	0.2	0.4	0.6
PB1	#	87-95	980	0.1	CVLEAMAFL	98.98	1	0.5	0.2	0.3	0.5
PB1	#	88-96	980	0.1	VLEAMAFLE	98.78	1.2	0.5	0.2	0.5	0.7
PB1	#	89-97	977	0.5	LEAMAFLEE	92.32	7.7	3.2	3.7	0.8	1.1
PB1	#	90-98	977	0.6	EAMAFLEES	92.12	7.9	3.2	3.7	1	1.3
PB1	#	91-99	976	0.6	AMAFLEESH	92.11	7.9	3.2	3.7	1	1.3
PB1	#	92-100	976	0.6	MAFLEESHP	92.01	8	3.2	4	0.8	1.2
PB1	#	93-101	976	0.6	AFLEESHPG	91.7	8.3	3.2	4.3	0.8	1.3
PB1	#	94-102	976	0.7	FLEESHPGI	90.16	9.8	3.2	5.8	0.8	1.5
PB1	#	95-103	976	0.7	LEESHPGIF	90.78	9.2	3.3	5.3	0.6	1.2
PB1	&	96-104	975	1	EESHPGIFE	84.72	15.3	6.1	8.6	0.6	1.3
PB1	&	97-105	980	1	ESHPGIFEN	84.29	15.7	5.9	9.3	0.5	1.4
PB1	#	98-106	983	0.6	SHPGIFENS	90.84	9.2	5.9	2.8	0.4	1.1
PB1	#	99-107	983	0.6	HPGIFENSC	91.05	9	5.9	2.8	0.2	0.9
PB1	#	100-108	984	0.7	PGIFENSCL	90.24	9.8	5.9	3.4	0.5	1.3
PB1	#	101-109	984	0.6	GIFENSCLE	90.45	9.6	5.9	3	0.6	1.3
PB1	#	102-110	984	0.7	IFENSCLET	90.45	9.6	5.9	3	0.6	1.3
PB1	#	103-111	984	0.6	FENSCLETM	91.36	8.6	5.9	2	0.7	1.3
PB1	#	104-112	984	0.6	ENSCLETME	91.36	8.6	5.9	2	0.7	1.3
PB1	&	105-113	984	0.7	NSCLETMEI	89.02	11	7.5	2.4	1	1.7
PB1	&	106-114	984	0.8	SCLETMEIV	87.91	12.1	7.5	3.6	1	1.8
PB1	&	107-115	984	0.8	CLETMEIVQ	87.7	12.3	7.5	3.8	1	1.9
PB1	&	108-116	984	0.8	LETMEIVQQ	87.6	12.4	7.5	3.8	1.1	2
PB1	&	109-117	984	0.8	ETMEIVQQT	87.8	12.2	7.6	3.9	0.7	1.6
PB1	&	110-118	984	0.8	TMEIVQQTR	87.8	12.2	7.6	3.9	0.7	1.6
PB1	&	111-119	984	0.8	MEIVQQTRV	87.7	12.3	7.6	4	0.7	1.6
PB1	&	112-120	984	0.7	EIVQQTRVD	88.21	11.8	7.7	3.6	0.5	1.3
PB1	&	113-121	984	0.8	IVQQTRVDK	88.21	11.8	7.7	3.6	0.5	1.3
PB1	#	114-122	985	0.3	VQQTRVDKL	96.55	3.5	1.5	1.5	0.4	1
PB1	#	115-123	985	0.2	QQTRVDKLT	98.27	1.7	0.5	0.8	0.4	0.8
PB1	#	116-124	985	0.1	QTRVDKLTQ	98.48	1.5	0.5	0.6	0.4	0.7
PB1	#	117-125	986	0.2	TRVDKLTQG	98.38	1.6	0.5	0.8	0.3	0.7
PB1	#	118-126	986	0.1	RVDKLTQGR	98.78	1.2	0.4	0.4	0.4	0.7
PB1	#	119-127	986	0.1	VDKLTQGRQ	98.78	1.2	0.4	0.4	0.4	0.7
PB1	#	120-128	986	0.1	DKLTQGRQT	99.19	0.8	0.2	0.2	0.4	0.6
PB1	#	121-129	986	0.1	KLTQGRQTY	99.19	0.8	0.2	0.2	0.4	0.6
PB1	#	122-130	986	0.1	LTQGRQTYD	99.19	0.8	0.2	0.2	0.4	0.6
PB1	#	123-131	986	0.1	TQGRQTYDW	99.29	0.7	0.2	0.2	0.3	0.5
PB1	#	124-132	986	0.1	QGRQTYDWT	99.49	0.5	0.2	0	0.3	0.4
PB1	#	125-133	986	0.1	GRQTYDWTL	99.49	0.5	0.2	0	0.3	0.4
PB1	#	126-134	986	<1	RQTYDWTLN	99.59	0.4	0.1	0	0.3	0.4
PB1	#	127-135	986	0.1	QTYDWTLNR	99.39	0.6	0.2	0	0.4	0.5
PB1	#	128-136	986	0.1	TYDWTLNRN	99.49	0.5	0.2	0	0.3	0.4
PB1	#	129-137	986	0.1	YDWTLNRNQ	99.49	0.5	0.2	0	0.3	0.4
PB1	#	130-138	986	0.1	DWTLNRNQP	99.39	0.6	0.2	0	0.4	0.5
PB1	#	131-139	986	0.1	WTLNRNQPA	99.39	0.6	0.2	0	0.4	0.5
PB1	#	132-140	986	0.1	TLNRNQPAA	99.29	0.7	0.2	0	0.5	0.6
PB1	#	133-141	986	0.1	LNRNQPAAT	99.09	0.9	0.2	0	0.7	0.8
PB1	#	134-142	986	0.1	NRNQPAATA	98.99	1	0.2	0	0.8	0.9
PB1	#	135-143	986	0.1	RNQPAATAL	99.09	0.9	0.2	0	0.7	0.8
PB1	#	136-144	986	0.1	NQPAATALA	99.19	0.8	0.2	0	0.6	0.7
PB1	#	137-145	986	0.1	QPAATALAN	99.19	0.8	0.2	0	0.6	0.7
PB1	#	138-146	986	0.1	PAATALANT	99.09	0.9	0.2	0	0.7	0.8
PB1	#	139-147	986	0.1	AATALANTI	99.29	0.7	0.2	0	0.5	0.6
PB1	#	140-148	986	0.1	ATALANTIE	99.09	0.9	0.2	0.2	0.5	0.7
PB1	&	141-149	986	0.7	TALANTIEI	85.4	14.6	13.4	0.8	0.4	0.8
PB1	&	142-150	986	0.7	ALANTIEIF	85.4	14.6	13.4	0.8	0.4	0.8
PB1	&	143-151	985	0.7	LANTIEIFR	84.97	15	13.4	1.3	0.3	0.8
PB1	&	144-152	985	0.8	ANTIEIFRS	83.65	16.3	13.4	2.4	0.5	1.2
PB1	&	145-153	985	0.8	NTIEIFRSN	83.76	16.2	13.4	2.2	0.6	1.2
PB1	&	146-154	985	1	TIEIFRSNG	82.44	17.6	11.5	5.5	0.6	1.6
PB1	&	147-155	985	1	IEIFRSNGL	82.54	17.5	11.5	5.5	0.5	1.5
PB1	&	148-156	985	1.1	EIFRSNGLT	81.73	18.3	11.4	6.2	0.7	1.8
PB1	&	149-157	985	1.1	IFRSNGLTA	81.22	18.8	11.4	6.7	0.7	1.9
PB1	#	150-158	985	0.7	FRSNGLTAN	90.25	9.7	2.7	6.4	0.6	1.6
PB1	#	151-159	985	0.8	RSNGLTANE	90.05	9.9	2.7	6.7	0.5	1.6
PB1	#	152-160	986	0.7	SNGLTANES	90.47	9.5	2.7	6.3	0.5	1.5
PB1	#	153-161	986	0.6	NGLTANESG	91.78	8.2	2.7	5.2	0.3	1.1
PB1	#	154-162	986	0.6	GLTANESGR	91.48	8.5	2.8	5.4	0.3	1.2
PB1	#	155-163	986	0.4	LTANESGRL	94.83	5.2	2.7	2.1	0.3	1
PB1	#	156-164	986	0.5	TANESGRLI	93.61	6.4	2.6	3.3	0.4	1.3
PB1	#	157-165	985	0.5	ANESGRLID	94.31	5.7	2.6	2.6	0.4	1.2
PB1	#	158-166	984	0.4	NESGRLIDF	94.61	5.4	2.6	2.2	0.5	1.2
PB1	#	159-167	984	0.3	ESGRLIDFL	97.26	2.7	0.9	1.4	0.4	1
PB1	#	160-168	984	0.3	SGRLIDFLK	97.05	2.9	0.9	1.7	0.3	0.9
PB1	#	161-169	984	0.3	GRLIDFLKD	97.05	2.9	0.9	1.7	0.3	0.9
PB1	#	162-170	984	0.3	RLIDFLKDV	96.95	3	0.9	1.7	0.4	1
PB1	#	163-171	985	0.5	LIDFLKDVM	93.91	6.1	1.5	4.2	0.4	1.2
PB1	#	164-172	985	0.6	IDFLKDVME	92.99	7	1.5	5	0.5	1.4
PB1	#	165-173	985	0.5	DFLKDVMES	94.21	5.8	1.5	3.7	0.6	1.3
PB1	#	166-174	986	0.5	FLKDVMESM	93.71	6.3	1.5	4.3	0.5	1.4
PB1	#	167-175	987	0.7	LKDVMESMD	92.2	7.8	1.5	5.8	0.5	1.6
PB1	#	168-176	987	0.7	KDVMESMDK	91.59	8.4	1.5	6.2	0.7	1.9
PB1	&	169-177	987	0.9	DVMESMDKE	88.86	11.1	2.8	7.3	1	2.4
PB1	&	170-178	987	0.9	VMESMDKEE	88.55	11.4	2.8	7.5	1.1	2.6
PB1	&	171-179	987	1.1	MESMDKEEM	87.23	12.8	2.8	8.9	1	2.7
PB1	&	172-180	987	0.9	ESMDKEEME	88.75	11.2	2.8	7.6	0.8	2.5
PB1	&	173-181	987	1	SMDKEEMEI	87.84	12.2	2.9	8.4	0.8	2.3
PB1	&	174-182	987	1.3	MDKEEMEIT	82.07	17.9	5.6	11.3	1	2.7
PB1	&	175-183	987	1.3	DKEEMEITT	81.97	18	5.6	11.2	1.2	2.7
PB1	&	176-184	987	1.2	KEEMEITTH	83.69	16.3	5.6	9.7	1	2.3
PB1	&	177-185	987	1.1	EEMEITTHF	84.19	15.8	5.6	9.1	1.1	2.1
PB1	&	178-186	987	0.8	EMEITTHFQ	87.94	12.1	6.2	4.6	1.3	1.9
PB1	&	179-187	987	0.8	MEITTHFQR	88.04	12	6.2	4.6	1.2	1.8
PB1	&	180-188	987	0.7	EITTHFQRK	89.46	10.5	6.2	3	1.3	1.7
PB1	#	181-189	987	0.6	ITTHFQRKR	90.27	9.7	6.2	2.3	1.2	1.6
PB1	#	182-190	987	0.6	TTHFQRKRR	90.48	9.5	6.2	2.4	0.9	1.3
PB1	#	183-191	987	0.5	THFQRKRRV	94.02	6	2.6	2.6	0.7	1.2
PB1	#	184-192	987	0.5	HFQRKRRVR	93.72	6.3	3	2.6	0.6	1.1
PB1	#	185-193	987	0.5	FQRKRRVRD	93.82	6.2	3	2.6	0.5	1
PB1	#	186-194	987	0.6	QRKRRVRDN	92.81	7.2	3	3.1	1	1.5
PB1	#	187-195	987	0.6	RKRRVRDNM	92.81	7.2	3	3	1.1	1.8
PB1	#	188-196	987	0.6	KRRVRDNMT	92.81	7.2	3	3	1.1	1.8
PB1	#	189-197	987	0.6	RRVRDNMTK	92.4	7.6	3	3.4	1.1	1.9
PB1	#	190-198	987	0.6	RVRDNMTKK	92	8	3	4	1	1.8
PB1	#	191-199	987	0.6	VRDNMTKKM	91.89	8.1	3	4	1.1	1.9
PB1	#	192-200	987	0.6	RDNMTKKMV	92.91	7.1	2.1	3.9	1.1	1.9
PB1	#	193-201	988	0.6	DNMTKKMVT	92.91	7.1	2.1	4	0.9	1.7
PB1	#	194-202	988	0.6	NMTKKMVTQ	92.71	7.3	2.1	4.1	1	1.9
PB1	#	195-203	988	0.6	MTKKMVTQR	93.42	6.6	2.1	3.3	1.1	1.9
PB1	#	196-204	988	0.4	TKKMVTQRT	94.94	5.1	2.2	1.7	1.1	1.6
PB1	#	197-205	988	0.6	KKMVTQRTI	93.52	6.5	2.2	3.1	1.1	1.9
PB1	#	198-206	988	0.5	KMVTQRTIG	93.72	6.3	2.2	2.9	1.1	1.9
PB1	#	199-207	989	0.5	MVTQRTIGK	93.93	6.1	2.3	2.7	1	1.8
PB1	#	200-208	993	0.6	VTQRTIGKK	93.05	6.9	2.3	3.6	1	2
PB1	#	201-209	993	0.5	TQRTIGKKK	94.86	5.1	0.9	3.1	1.1	2.2
PB1	#	202-210	993	0.5	QRTIGKKKQ	95.07	4.9	0.9	2.9	1.1	2.1
PB1	#	203-211	994	0.6	RTIGKKKQR	92.86	7.1	2.2	3.7	1.2	2.3
PB1	#	204-212	994	0.7	TIGKKKQRL	92.25	7.7	2.3	4.4	1	2.2
PB1	&	205-213	994	0.9	IGKKKQRLN	89.74	10.3	2.3	7	0.9	2.5
PB1	&	206-214	993	0.8	GKKKQRLNK	89.93	10.1	2.3	6.9	0.8	2.3
PB1	&	207-215	992	1.8	KKKQRLNKK	52.42	47.6	37.7	8.3	1.6	3.5
PB1	&	208-216	992	1.8	KKQRLNKKS	52.52	47.5	37.1	8.7	1.7	3.5
PB1	&	209-217	992	1.7	KQRLNKKSY	53.13	46.9	37.5	8	1.4	3
PB1	&	210-218	992	1.6	QRLNKKSYL	53.63	46.4	37.6	7.4	1.4	2.8
PB1	&	211-219	992	1.7	RLNKKSYLI	53.43	46.6	37.4	7.7	1.5	3
PB1	&	212-220	992	1.5	LNKKSYLIR	55.04	45	38.3	5.2	1.4	2.7
PB1	&	213-221	993	1.5	NKKSYLIRA	55.19	44.8	38.5	4.7	1.6	2.8
PB1	&	214-222	993	1.3	KKSYLIRAL	57.3	42.7	39.3	2.3	1.1	1.7
PB1	&	215-223	993	1.2	KSYLIRALT	58.11	41.9	39.8	1.2	0.9	1.3
PB1	#	216-224	995	0.2	SYLIRALTL	97.89	2.1	0.9	0.4	0.8	1.1
PB1	#	217-225	995	0.1	YLIRALTLN	98.89	1.1	0.2	0.2	0.7	0.9
PB1	#	218-226	995	0.1	LIRALTLNT	98.89	1.1	0.2	0.2	0.7	0.9
PB1	#	219-227	996	0.1	IRALTLNTM	99	1	0.2	0.2	0.6	0.8
PB1	#	220-228	996	0.1	RALTLNTMT	99.2	0.8	0.2	0.2	0.4	0.6
PB1	#	221-229	996	0.1	ALTLNTMTK	99.2	0.8	0.2	0.2	0.4	0.6
PB1	#	222-230	996	<1	LTLNTMTKD	99.6	0.4	0.2	0	0.2	0.3
PB1	#	223-231	996	<1	TLNTMTKDA	99.6	0.4	0.2	0	0.2	0.3
PB1	#	224-232	993	0.1	LNTMTKDAE	99.5	0.5	0.2	0	0.3	0.4
PB1	#	225-233	993	0.1	NTMTKDAER	99.5	0.5	0.2	0	0.3	0.4
PB1	#	226-234	993	0.1	TMTKDAERG	99.4	0.6	0.2	0	0.4	0.5
PB1	#	227-235	993	0.1	MTKDAERGK	99.5	0.5	0.2	0	0.3	0.4
PB1	#	228-236	993	0.1	TKDAERGKL	99.3	0.7	0.2	0.2	0.3	0.5
PB1	#	229-237	993	0.1	KDAERGKLK	98.99	1	0.4	0	0.6	0.7
PB1	#	230-238	993	0.1	DAERGKLKR	98.49	1.5	0.5	0.4	0.6	0.8
PB1	#	231-239	993	0.2	AERGKLKRR	98.49	1.5	0.5	0.4	0.6	0.8
PB1	#	232-240	993	0.2	ERGKLKRRA	98.29	1.7	0.5	0.4	0.8	1
PB1	#	233-241	996	0.2	RGKLKRRAI	98.19	1.8	0.5	0.5	0.8	1
PB1	#	234-242	996	0.2	GKLKRRAIA	98.19	1.8	0.5	0.5	0.8	1
PB1	#	235-243	996	0.2	KLKRRAIAT	98.09	1.9	0.6	0.5	0.8	1
PB1	#	236-244	997	0.2	LKRRAIATP	98.19	1.8	0.6	0.5	0.7	0.9
PB1	#	237-245	997	0.2	KRRAIATPG	98.29	1.7	0.6	0.5	0.6	0.8
PB1	#	238-246	997	0.1	RRAIATPGM	98.9	1.1	0.6	0	0.5	0.6
PB1	#	239-247	998	0.1	RAIATPGMQ	99.2	0.8	0.2	0	0.6	0.7
PB1	#	240-248	998	0.1	AIATPGMQI	98.8	1.2	0.2	0	1	1.1
PB1	#	241-249	996	0.1	IATPGMQIR	98.9	1.1	0.2	0	0.9	1
PB1	#	242-250	996	0.1	ATPGMQIRG	99	1	0.2	0	0.8	0.9
PB1	#	243-251	994	0.1	TPGMQIRGF	98.69	1.3	0.2	0.2	0.9	1.1
PB1	#	244-252	994	0.1	PGMQIRGFV	98.79	1.2	0.2	0.2	0.8	1
PB1	#	245-253	995	0.2	GMQIRGFVY	97.49	2.5	1.2	0.4	0.9	1.2
PB1	#	246-254	996	0.2	MQIRGFVYF	97.49	2.5	1.2	0.4	0.9	1.2
PB1	#	247-255	996	0.2	QIRGFVYFV	97.59	2.4	1.2	0.4	0.8	1.1
PB1	#	248-256	996	0.2	IRGFVYFVE	97.79	2.2	1.2	0.2	0.8	1
PB1	#	249-257	996	0.3	RGFVYFVET	96.89	3.1	1.2	1.5	0.4	0.8
PB1	#	250-258	999	0.3	GFVYFVETL	96.8	3.2	1.2	1.5	0.5	0.9
PB1	#	251-259	999	0.3	FVYFVETLA	96.4	3.6	1.2	1.9	0.5	1.1
PB1	#	252-260	1001	0.3	VYFVETLAR	96	4	1.2	2.3	0.5	1.1
PB1	#	253-261	1000	0.7	YFVETLARS	90	10	4.9	4.6	0.5	1.4
PB1	#	254-262	1000	0.7	FVETLARSI	90	10	4.9	4.8	0.3	1.2
PB1	#	255-263	1000	0.7	VETLARSIC	90	10	4.9	4.8	0.3	1.2
PB1	&	256-264	1001	0.8	ETLARSICE	88.61	11.4	4.9	6.2	0.3	1.3
PB1	&	257-265	1001	0.8	TLARSICEK	88.71	11.3	4.9	6.2	0.2	1.2
PB1	#	258-266	1001	0.6	LARSICEKL	91.21	8.8	4.9	3.7	0.2	1
PB1	#	259-267	1001	0.6	ARSICEKLE	91.21	8.8	4.9	3.7	0.2	1
PB1	#	260-268	1002	0.6	RSICEKLEQ	91.52	8.5	4.9	3.3	0.3	0.9
PB1	#	261-269	1002	0.6	SICEKLEQS	91.92	8.1	4.9	2.9	0.3	0.9
PB1	#	262-270	1003	0.2	ICEKLEQSG	97.91	2.1	1.4	0.4	0.3	0.6
PB1	#	263-271	1003	0.2	CEKLEQSGL	98.01	2	1.4	0.2	0.4	0.6
PB1	#	264-272	1003	0.2	EKLEQSGLP	97.91	2.1	1.4	0.2	0.5	0.7
PB1	#	265-273	1003	0.1	KLEQSGLPV	99	1	0.3	0.2	0.5	0.7
PB1	#	266-274	1003	0.1	LEQSGLPVG	98.9	1.1	0.3	0.2	0.6	0.8
PB1	#	267-275	1003	0.1	EQSGLPVGG	98.8	1.2	0.3	0.2	0.7	0.9
PB1	#	268-276	1003	0.1	QSGLPVGGN	98.8	1.2	0.3	0.2	0.7	0.9
PB1	#	269-277	1003	0.1	SGLPVGGNE	98.9	1.1	0.3	0.2	0.6	0.8
PB1	#	270-278	1003	0.1	GLPVGGNEK	99.1	0.9	0.3	0	0.6	0.7
PB1	#	271-279	1003	0.1	LPVGGNEKK	99.1	0.9	0.3	0	0.6	0.7
PB1	#	272-280	1003	0.1	PVGGNEKKA	99.2	0.8	0.3	0	0.5	0.6
PB1	#	273-281	1003	0.1	VGGNEKKAK	99.3	0.7	0.3	0	0.4	0.5
PB1	#	274-282	1003	<1	GGNEKKAKL	99.6	0.4	0.1	0	0.3	0.4
PB1	#	275-283	1003	<1	GNEKKAKLA	99.7	0.3	0.1	0	0.2	0.3
PB1	#	276-284	1003	<1	NEKKAKLAN	99.8	0.2	0.1	0	0.1	0.2
PB1	#	277-285	1003	<1	EKKAKLANV	99.8	0.2	0.1	0	0.1	0.2
PB1	#	278-286	1003	<1	KKAKLANVV	99.9	0.1	0.1	0	0	0.1
PB1	#	279-287	1003	0	KAKLANVVR	100	0	0	0	0	0
PB1	#	280-288	1003	0	AKLANVVRK	100	0	0	0	0	0
PB1	#	281-289	1003	0	KLANVVRKM	100	0	0	0	0	0
PB1	#	282-290	1003	<1	LANVVRKMM	99.9	0.1	0.1	0	0	0.1
PB1	#	283-291	1003	<1	ANVVRKMMT	99.8	0.2	0.1	0	0.1	0.2
PB1	#	284-292	1003	0.1	NVVRKMMTN	99.3	0.7	0.5	0	0.2	0.3
PB1	#	285-293	1003	0.1	VVRKMMTNS	99.3	0.7	0.5	0	0.2	0.3
PB1	#	286-294	1003	0.1	VRKMMTNSQ	99	1	0.5	0.2	0.3	0.5
PB1	#	287-295	1003	0.1	RKMMTNSQD	99	1	0.5	0.2	0.3	0.5
PB1	#	288-296	1003	0.2	KMMTNSQDT	98.31	1.7	0.5	0.9	0.3	0.8
PB1	#	289-297	1003	0.2	MMTNSQDTE	98.31	1.7	0.5	0.9	0.3	0.8
PB1	#	290-298	1003	0.3	MTNSQDTEL	95.71	4.3	2.6	1.4	0.3	0.9
PB1	#	291-299	1003	0.3	TNSQDTELS	95.71	4.3	2.6	1.4	0.3	0.9
PB1	#	292-300	1003	0.3	NSQDTELSF	95.71	4.3	2.6	1.4	0.3	0.9
PB1	#	293-301	1003	0.3	SQDTELSFT	96.21	3.8	2.6	0.9	0.3	0.8
PB1	#	294-302	1003	0.4	QDTELSFTI	94.72	5.3	2.6	2.3	0.4	1
PB1	#	295-303	1003	0.4	DTELSFTIT	95.01	5	2.6	2.1	0.3	0.8
PB1	#	296-304	1003	0.4	TELSFTITG	95.01	5	2.6	2.1	0.3	0.8
PB1	#	297-305	1003	0.3	ELSFTITGD	95.51	4.5	2.6	1.4	0.5	0.7
PB1	#	298-306	1003	0.4	LSFTITGDN	95.31	4.7	2.6	1.4	0.7	0.9
PB1	#	299-307	1003	0.2	SFTITGDNT	97.81	2.2	1.4	0	0.8	0.9
PB1	#	300-308	1002	0.2	FTITGDNTK	97.9	2.1	1.4	0	0.7	0.8
PB1	#	301-309	1002	0.2	TITGDNTKW	97.8	2.2	1.4	0	0.8	0.9
PB1	#	302-310	1002	0.2	ITGDNTKWN	97.8	2.2	1.4	0	0.8	0.9
PB1	#	303-311	1002	0.1	TGDNTKWNE	99.3	0.7	0.1	0	0.6	0.7
PB1	#	304-312	1002	0.1	GDNTKWNEN	99.3	0.7	0.1	0	0.6	0.7
PB1	#	305-313	1001	0.1	DNTKWNENQ	99.3	0.7	0.1	0	0.6	0.7
PB1	#	306-314	1001	0.1	NTKWNENQN	98.8	1.2	0.6	0	0.6	0.7
PB1	#	307-315	1001	0.1	TKWNENQNP	99	1	0.6	0	0.4	0.5
PB1	#	308-316	1001	0.1	KWNENQNPR	98.8	1.2	0.6	0.2	0.4	0.6
PB1	#	309-317	1002	0.4	WNENQNPRM	95.11	4.9	1.8	2.5	0.6	1
PB1	#	310-318	1002	0.4	NENQNPRMF	95.21	4.8	1.8	2.5	0.5	0.9
PB1	#	311-319	1002	0.4	ENQNPRMFL	95.21	4.8	1.8	2.5	0.5	0.9
PB1	#	312-320	1002	0.4	NQNPRMFLA	94.81	5.2	1.8	2.7	0.7	1.2
PB1	#	313-321	1001	0.4	QNPRMFLAM	94.81	5.2	1.8	2.7	0.7	1.2
PB1	#	314-322	1001	0.5	NPRMFLAMI	94.31	5.7	1.8	3.2	0.7	1.3
PB1	#	315-323	1001	0.5	PRMFLAMIT	94.21	5.8	1.8	3.2	0.8	1.4
PB1	#	316-324	1001	0.5	RMFLAMITY	94.31	5.7	1.8	3.2	0.7	1.3
PB1	#	317-325	1002	0.4	MFLAMITYI	94.51	5.5	1.8	3.3	0.4	1
PB1	#	318-326	1002	0.2	FLAMITYIT	98.1	1.9	0.6	0.9	0.4	0.7
PB1	#	319-327	1002	0.3	LAMITYITR	95.91	4.1	2	1.5	0.6	1.1
PB1	#	320-328	1002	0.6	AMITYITRN	92.32	7.7	3.3	3.6	0.8	1.5
PB1	#	321-329	1002	0.5	MITYITRNQ	92.71	7.3	3.3	3.2	0.8	1.4
PB1	#	322-330	1003	0.5	ITYITRNQP	92.72	7.3	3.3	3.2	0.8	1.4
PB1	&	323-331	1003	0.8	TYITRNQPE	89.53	10.5	3.4	6.2	0.9	1.6
PB1	#	324-332	1003	0.7	YITRNQPEW	90.23	9.8	3.4	5.6	0.8	1.4
PB1	#	325-333	1003	0.7	ITRNQPEWF	90.13	9.9	3.4	5.6	0.9	1.5
PB1	#	326-334	1003	0.7	TRNQPEWFR	90.13	9.9	3.4	5.6	0.9	1.5
PB1	#	327-335	1002	0.7	RNQPEWFRN	90.02	10	3.4	5.6	1	1.6
PB1	#	328-336	1002	0.6	NQPEWFRNV	91.62	8.4	3.4	4.2	0.8	1.4
PB1	#	329-337	1001	0.4	QPEWFRNVL	95.1	4.9	1.7	2.3	0.9	1.3
PB1	#	330-338	1001	0.4	PEWFRNVLS	95.2	4.8	1.7	2.3	0.8	1.2
PB1	#	331-339	1001	0.4	EWFRNVLSI	94.91	5.1	1.7	2.5	0.9	1.4
PB1	#	332-340	1001	0.2	WFRNVLSIA	98.5	1.5	0.5	0.2	0.8	1
PB1	#	333-341	1001	0.2	FRNVLSIAP	98.5	1.5	0.5	0.2	0.8	1
PB1	#	334-342	1001	0.1	RNVLSIAPI	98.6	1.4	0.5	0.2	0.7	0.9
PB1	#	335-343	1001	0.1	NVLSIAPIM	98.6	1.4	0.5	0.2	0.7	0.9
PB1	#	336-344	1001	0.1	VLSIAPIMF	98.8	1.2	0.5	0.2	0.5	0.7
PB1	#	337-345	1001	0.1	LSIAPIMFS	99.4	0.6	0.2	0	0.4	0.5
PB1	#	338-346	1003	0.1	SIAPIMFSN	99.4	0.6	0.2	0	0.4	0.5
PB1	#	339-347	1002	0.1	IAPIMFSNK	99.5	0.5	0.2	0	0.3	0.4
PB1	#	340-348	1002	0.1	APIMFSNKM	99.5	0.5	0.2	0	0.3	0.4
PB1	#	341-349	1002	0.1	PIMFSNKMA	99.4	0.6	0.2	0	0.4	0.5
PB1	#	342-350	1002	0.2	IMFSNKMAR	98.1	1.9	1.3	0.2	0.4	0.6
PB1	#	343-351	1002	0.2	MFSNKMARL	98.1	1.9	1.3	0.2	0.4	0.6
PB1	#	344-352	1002	0.2	FSNKMARLG	98.2	1.8	1.3	0.2	0.3	0.5
PB1	&	345-353	999	0.9	SNKMARLGK	75.18	24.8	23	1.5	0.3	0.6
PB1	&	346-354	999	0.9	NKMARLGKG	75.18	24.8	23	1.5	0.3	0.6
PB1	&	347-355	999	0.9	KMARLGKGY	75.28	24.7	23	1.5	0.2	0.5
PB1	&	348-356	999	0.9	MARLGKGYM	75.18	24.8	23	1.5	0.3	0.6
PB1	&	349-357	999	0.9	ARLGKGYMF	75.38	24.6	23	1.3	0.3	0.5
PB1	&	350-358	999	0.9	RLGKGYMFE	75.28	24.7	23	1.3	0.4	0.6
PB1	&	351-359	999	0.8	LGKGYMFES	76.58	23.4	23	0	0.4	0.5
PB1	&	352-360	999	0.9	GKGYMFESK	76.08	23.9	22.9	0.4	0.6	0.8
PB1	&	353-361	998	0.9	KGYMFESKS	75.45	24.5	22.9	0.7	0.9	1.2
PB1	#	354-362	1001	0.2	GYMFESKSM	98.2	1.8	0.4	0.5	0.9	1.2
PB1	#	355-363	1001	0.3	YMFESKSMK	97.3	2.7	0.8	0.9	1	1.4
PB1	#	356-364	1006	0.3	MFESKSMKL	97.02	3	0.8	0.9	1.3	1.7
PB1	#	357-365	1005	0.3	FESKSMKLR	97.01	3	0.8	0.9	1.3	1.7
PB1	#	358-366	1005	0.3	ESKSMKLRT	96.82	3.2	0.8	1.1	1.3	1.8
PB1	#	359-367	1005	0.3	SKSMKLRTQ	96.92	3.1	0.8	1.3	1	1.6
PB1	#	360-368	1006	0.3	KSMKLRTQI	96.52	3.5	0.8	1.6	1.1	1.8
PB1	#	361-369	1006	0.3	SMKLRTQIP	97.12	2.9	0.8	1	1.1	1.6
PB1	#	362-370	1007	0.2	MKLRTQIPA	97.62	2.4	0.7	0.7	1	1.4
PB1	#	363-371	1006	0.2	KLRTQIPAE	97.71	2.3	0.7	0.7	0.9	1.3
PB1	#	364-372	1006	0.3	LRTQIPAEM	96.22	3.8	1.7	1.1	1	1.5
PB1	#	365-373	1006	0.3	RTQIPAEML	96.32	3.7	1.7	1.3	0.7	1.3
PB1	#	366-374	1006	0.4	TQIPAEMLA	95.73	4.3	1.6	1.9	0.8	1.6
PB1	&	367-375	1006	0.8	QIPAEMLAN	88.97	11	5	5.2	0.9	2
PB1	&	368-376	1006	0.8	IPAEMLANI	88.37	11.6	5	5.8	0.9	2
PB1	&	369-377	1006	0.8	PAEMLANID	88.47	11.5	5	5.9	0.7	1.8
PB1	&	370-378	1006	0.9	AEMLANIDL	87.87	12.1	5	6.4	0.8	2
PB1	&	371-379	1009	0.9	EMLANIDLK	87.91	12.1	4.8	6.6	0.7	2
PB1	&	372-380	1010	0.9	MLANIDLKY	87.92	12.1	4.8	6.6	0.7	2
PB1	&	373-381	1010	0.7	LANIDLKYF	89.6	10.4	5	5	0.4	1.4
PB1	&	374-382	1010	0.7	ANIDLKYFN	89.8	10.2	5	4.8	0.4	1.3
PB1	&	375-383	1010	1	NIDLKYFNE	84.75	15.2	5	9.8	0.4	1.5
PB1	&	376-384	1010	1.4	IDLKYFNEL	72.18	27.8	16.5	10.6	0.7	1.8
PB1	&	377-385	1010	1.4	DLKYFNELT	72.77	27.2	16.6	9.9	0.7	1.7
PB1	&	378-386	1010	1.6	LKYFNELTK	71.68	28.3	13.9	13.8	0.7	1.9
PB1	&	379-387	1010	1.7	KYFNELTKK	70.69	29.3	13.2	15.4	0.7	2.1
PB1	&	380-388	1009	1.6	YFNELTKKK	70.86	29.1	13.5	15.1	0.6	1.9
PB1	&	381-389	1009	1.6	FNELTKKKI	70.86	29.1	13.5	15.1	0.6	1.9
PB1	&	382-390	1009	1.7	NELTKKKIE	70.66	29.3	13.3	15.3	0.8	2.2
PB1	&	383-391	1009	1.7	ELTKKKIEK	70.27	29.7	13.2	15.5	1.1	2.6
PB1	&	384-392	1009	1.5	LTKKKIEKI	74.13	25.9	12.8	11.7	1.4	2.8
PB1	&	385-393	1008	1.1	TKKKIEKIR	80.36	19.6	14.4	4	1.3	2.2
PB1	&	386-394	1008	1.1	KKKIEKIRP	80.16	19.8	14.4	4	1.5	2.4
PB1	#	387-395	1008	0.5	KKIEKIRPL	94.44	5.6	1.6	2.7	1.3	2
PB1	#	388-396	1008	0.3	KIEKIRPLL	97.02	3	0.8	1.2	1	1.5
PB1	#	389-397	1008	0.6	IEKIRPLLI	92.46	7.5	3.3	3.3	1	1.9
PB1	#	390-398	1007	0.8	EKIRPLLID	90.37	9.6	3.3	5.4	1	2.2
PB1	#	391-399	1007	0.7	KIRPLLIDG	90.76	9.2	3.3	5.1	0.9	2
PB1	&	392-400	1007	1	IRPLLIDGT	85.7	14.3	5.7	7.9	0.7	1.8
PB1	&	393-401	1007	0.9	RPLLIDGTA	86.69	13.3	5.6	6.9	0.9	1.8
PB1	&	394-402	1008	0.9	PLLIDGTAS	86.81	13.2	5.6	6.7	0.9	1.7
PB1	&	395-403	1008	0.9	LLIDGTASL	87	13	5.7	6.7	0.6	1.4
PB1	&	396-404	1007	0.9	LIDGTASLS	86.99	13	5.7	6.8	0.6	1.4
PB1	&	397-405	1007	0.9	IDGTASLSP	86.99	13	5.7	6.8	0.6	1.4
PB1	#	398-406	1008	0.6	DGTASLSPG	91.27	8.7	5.8	2.5	0.5	0.9
PB1	#	399-407	1009	0.4	GTASLSPGM	93.56	6.4	5.8	0	0.6	0.7
PB1	#	400-408	1009	0.4	TASLSPGMM	93.66	6.3	5.8	0	0.5	0.6
PB1	#	401-409	1009	0.1	ASLSPGMMM	99.5	0.5	0.2	0	0.3	0.4
PB1	#	402-410	1009	<1	SLSPGMMMG	99.8	0.2	0.1	0	0.1	0.2
PB1	#	403-411	1009	<1	LSPGMMMGM	99.8	0.2	0.1	0	0.1	0.2
PB1	#	404-412	1009	<1	SPGMMMGMF	99.7	0.3	0.1	0	0.2	0.3
PB1	#	405-413	1010	0.1	PGMMMGMFN	99.5	0.5	0.1	0	0.4	0.5
PB1	#	406-414	1011	0.1	GMMMGMFNM	99.51	0.5	0.1	0	0.4	0.5
PB1	#	407-415	1011	0.1	MMMGMFNML	99.51	0.5	0.1	0	0.4	0.5
PB1	#	408-416	1011	<1	MMGMFNMLS	99.6	0.4	0.1	0	0.3	0.4
PB1	#	409-417	1011	<1	MGMFNMLST	99.6	0.4	0.1	0	0.3	0.4
PB1	#	410-418	1012	0.1	GMFNMLSTV	99.21	0.8	0.3	0	0.5	0.6
PB1	#	411-419	1011	0.1	MFNMLSTVL	99.21	0.8	0.3	0	0.5	0.6
PB1	#	412-420	1011	0.1	FNMLSTVLG	99.21	0.8	0.3	0	0.5	0.6
PB1	#	413-421	1013	0.1	NMLSTVLGV	99.31	0.7	0.3	0	0.4	0.5
PB1	#	414-422	1013	0.1	MLSTVLGVS	99.31	0.7	0.3	0.2	0.2	0.4
PB1	#	415-423	1013	0.1	LSTVLGVSI	99.11	0.9	0.3	0.4	0.2	0.5
PB1	#	416-424	1013	0.1	STVLGVSIL	99.01	1	0.3	0.4	0.3	0.6
PB1	#	417-425	1012	0.1	TVLGVSILN	98.91	1.1	0.3	0.4	0.4	0.7
PB1	#	418-426	1012	0.1	VLGVSILNL	98.91	1.1	0.3	0.4	0.4	0.7
PB1	#	419-427	1012	0.1	LGVSILNLG	99.31	0.7	0.2	0.2	0.3	0.5
PB1	#	420-428	1012	0.1	GVSILNLGQ	99.31	0.7	0.2	0.2	0.3	0.5
PB1	#	421-429	1011	0.1	VSILNLGQK	99.01	1	0.3	0.4	0.3	0.6
PB1	#	422-430	1011	0.4	SILNLGQKR	94.36	5.6	4.5	0.9	0.3	0.8
PB1	#	423-431	1011	0.4	ILNLGQKRY	94.46	5.5	4.5	0.7	0.3	0.7
PB1	#	424-432	1012	0.4	LNLGQKRYT	94.47	5.5	4.5	0.7	0.3	0.7
PB1	#	425-433	1012	0.4	NLGQKRYTK	94.07	5.9	4.5	0.9	0.5	1
PB1	#	426-434	1012	0.4	LGQKRYTKT	94.17	5.8	4.5	0.9	0.4	0.9
PB1	#	427-435	1011	0.4	GQKRYTKTT	93.57	6.4	4.5	1.5	0.4	1
PB1	#	428-436	1011	0.5	QKRYTKTTY	93.47	6.5	4.5	1.5	0.5	1.1
PB1	#	429-437	1011	0.5	KRYTKTTYW	93.47	6.5	4.5	1.5	0.5	1.1
PB1	#	430-438	1010	0.5	RYTKTTYWW	93.56	6.4	4.5	1.5	0.5	1.1
PB1	#	431-439	1011	0.2	YTKTTYWWD	98.22	1.8	0.6	0.7	0.5	0.9
PB1	#	432-440	1010	0.2	TKTTYWWDG	98.22	1.8	0.6	0.7	0.5	0.9
PB1	#	433-441	1010	0.2	KTTYWWDGL	98.42	1.6	0.6	0.5	0.5	0.8
PB1	#	434-442	1010	0.1	TTYWWDGLQ	98.61	1.4	0.6	0.3	0.5	0.7
PB1	#	435-443	1009	0.1	TYWWDGLQS	98.61	1.4	0.6	0.3	0.5	0.7
PB1	#	436-444	1010	0.1	YWWDGLQSS	99.21	0.8	0.3	0	0.5	0.6
PB1	#	437-445	1010	0.1	WWDGLQSSD	99.31	0.7	0.3	0	0.4	0.5
PB1	#	438-446	1011	0.1	WDGLQSSDD	99.31	0.7	0.3	0	0.4	0.5
PB1	#	439-447	1011	<1	DGLQSSDDF	99.6	0.4	0.1	0	0.3	0.4
PB1	#	440-448	1011	0.1	GLQSSDDFA	99.21	0.8	0.3	0	0.5	0.6
PB1	#	441-449	1011	0.1	LQSSDDFAL	99.21	0.8	0.3	0	0.5	0.6
PB1	#	442-450	1011	0.1	QSSDDFALI	99.21	0.8	0.3	0	0.5	0.6
PB1	#	443-451	1011	0.3	SSDDFALIV	95.25	4.7	3.7	0.7	0.4	0.7
PB1	#	444-452	1011	0.4	SDDFALIVN	95.05	4.9	3.7	0.7	0.6	0.9
PB1	#	445-453	1011	0.3	DDFALIVNA	95.15	4.8	3.7	0.7	0.5	0.8
PB1	#	446-454	1006	0.6	DFALIVNAP	92.45	7.6	3.7	3.2	0.7	1.3
PB1	#	447-455	1006	0.7	FALIVNAPN	90.85	9.1	3.7	4.7	0.8	1.6
PB1	#	448-456	1006	0.7	ALIVNAPNH	90.76	9.2	3.5	4.9	0.9	1.8
PB1	#	449-457	1006	0.7	LIVNAPNHE	90.85	9.1	3.5	4.6	1.1	1.9
PB1	#	450-458	1006	0.7	IVNAPNHEG	90.85	9.1	3.5	4.6	1.1	1.9
PB1	#	451-459	1006	0.7	VNAPNHEGI	90.76	9.2	3.5	4.6	1.2	2
PB1	#	452-460	1006	0.5	NAPNHEGIQ	94.23	5.8	1.5	3	1.3	1.9
PB1	#	453-461	1006	0.5	APNHEGIQA	94.33	5.7	1.5	3	1.2	1.8
PB1	#	454-462	1006	0.5	PNHEGIQAG	94.14	5.9	1.5	3	1.4	2
PB1	#	455-463	1008	0.3	NHEGIQAGV	96.33	3.7	1.5	0.8	1.4	1.8
PB1	#	456-464	1007	0.3	HEGIQAGVD	96.43	3.6	1.4	0.8	1.4	1.7
PB1	#	457-465	1007	0.3	EGIQAGVDR	97.12	2.9	1.4	0.3	1.2	1.4
PB1	#	458-466	1007	0.2	GIQAGVDRF	97.32	2.7	1.4	0.3	1	1.2
PB1	#	459-467	1008	0.2	IQAGVDRFY	97.42	2.6	1.4	0.3	0.9	1.1
PB1	#	460-468	1008	0.2	QAGVDRFYR	97.22	2.8	1.4	0.5	0.9	1.2
PB1	#	461-469	1013	0.3	AGVDRFYRT	96.74	3.3	1.4	1.2	0.7	1.3
PB1	#	462-470	1013	0.3	GVDRFYRTC	96.45	3.6	1.5	1.4	0.7	1.4
PB1	#	463-471	1013	0.3	VDRFYRTCK	96.45	3.6	1.5	1.4	0.7	1.4
PB1	#	464-472	1013	0.3	DRFYRTCKL	96.74	3.3	1.5	1.1	0.7	1.3
PB1	#	465-473	1013	0.2	RFYRTCKLV	98.12	1.9	0.3	0.8	0.8	1.3
PB1	#	466-474	1013	0.2	FYRTCKLVG	98.32	1.7	0.3	0.8	0.6	1.1
PB1	#	467-475	1014	0.2	YRTCKLVGI	98.32	1.7	0.3	0.8	0.6	1.1
PB1	#	468-476	1014	0.2	RTCKLVGIN	97.93	2.1	0.3	1.2	0.6	1.3
PB1	#	469-477	1015	0.2	TCKLVGINM	98.13	1.9	0.3	0.8	0.8	1.3
PB1	#	470-478	1015	0.2	CKLVGINMS	98.03	2	0.3	0.7	1	1.4
PB1	#	471-479	1016	0.2	KLVGINMSK	98.13	1.9	0.3	0.7	0.9	1.3
PB1	#	472-480	1016	0.2	LVGINMSKK	98.13	1.9	0.3	0.9	0.7	1.2
PB1	#	473-481	1016	0.2	VGINMSKKK	98.03	2	0.3	0.9	0.8	1.3
PB1	#	474-482	1016	0.2	GINMSKKKS	98.03	2	0.3	0.9	0.8	1.3
PB1	#	475-483	1016	0.2	INMSKKKSY	97.93	2.1	0.3	0.9	0.9	1.4
PB1	#	476-484	1016	0.2	NMSKKKSYI	97.93	2.1	0.3	0.9	0.9	1.4
PB1	#	477-485	1016	0.2	MSKKKSYIN	98.13	1.9	0.3	0.9	0.7	1.2
PB1	#	478-486	1016	0.2	SKKKSYINR	97.83	2.2	0.3	0.9	1	1.5
PB1	#	479-487	1015	0.2	KKKSYINRT	98.52	1.5	0.2	0.4	0.9	1.2
PB1	#	480-488	1002	0.2	KKSYINRTG	98.6	1.4	0.2	0.2	1	1.2
PB1	#	481-489	1000	0.1	KSYINRTGT	98.7	1.3	0.2	0	1.1	1.2
PB1	#	482-490	997	0.2	SYINRTGTF	98.5	1.5	0.4	0.2	0.9	1.1
PB1	#	483-491	985	0.2	YINRTGTFE	98.38	1.6	0.4	0.2	1	1.2
PB1	#	484-492	975	0.2	INRTGTFEF	98.36	1.6	0.4	0.4	0.8	1.1
PB1	#	485-493	973	0.2	NRTGTFEFT	98.46	1.5	0.4	0.2	0.9	1.1
PB1	#	486-494	973	0.2	RTGTFEFTS	98.46	1.5	0.4	0.2	0.9	1.1
PB1	#	487-495	966	0.1	TGTFEFTSF	98.86	1.1	0.4	0	0.7	0.8
PB1	#	488-496	965	0.1	GTFEFTSFF	99.07	0.9	0.4	0	0.5	0.6
PB1	#	489-497	965	0.1	TFEFTSFFY	98.76	1.2	0.4	0.2	0.6	0.8
PB1	#	490-498	965	0.1	FEFTSFFYR	98.65	1.3	0.4	0.2	0.7	0.9
PB1	#	491-499	965	0.1	EFTSFFYRY	99.17	0.8	0.2	0.2	0.4	0.6
PB1	#	492-500	965	0.1	FTSFFYRYG	99.17	0.8	0.2	0.2	0.4	0.6
PB1	#	493-501	965	0.1	TSFFYRYGF	99.38	0.6	0.2	0	0.4	0.5
PB1	#	494-502	965	0.1	SFFYRYGFV	99.48	0.5	0.2	0	0.3	0.4
PB1	#	495-503	965	0.1	FFYRYGFVA	99.27	0.7	0.2	0	0.5	0.6
PB1	#	496-504	965	0.1	FYRYGFVAN	99.27	0.7	0.2	0	0.5	0.6
PB1	#	497-505	965	0.1	YRYGFVANF	99.17	0.8	0.2	0	0.6	0.7
PB1	#	498-506	965	0.1	RYGFVANFS	99.38	0.6	0.1	0	0.5	0.6
PB1	#	499-507	965	0.1	YGFVANFSM	99.38	0.6	0.1	0	0.5	0.6
PB1	#	500-508	965	0.1	GFVANFSME	99.38	0.6	0.1	0	0.5	0.6
PB1	#	501-509	965	0.1	FVANFSMEL	99.38	0.6	0.1	0	0.5	0.6
PB1	#	502-510	965	0.1	VANFSMELP	99.38	0.6	0.1	0	0.5	0.6
PB1	#	503-511	965	0.1	ANFSMELPS	99.17	0.8	0.2	0	0.6	0.7
PB1	#	504-512	965	0.1	NFSMELPSF	98.65	1.3	0.6	0.2	0.5	0.7
PB1	#	505-513	965	0.1	FSMELPSFG	98.65	1.3	0.6	0.4	0.3	0.6
PB1	#	506-514	965	0.1	SMELPSFGV	98.86	1.1	0.6	0.4	0.1	0.4
PB1	#	507-515	965	0.1	MELPSFGVS	98.34	1.7	0.6	1	0	0.5
PB1	#	508-516	965	0.2	ELPSFGVSG	98.34	1.7	0.6	0.8	0.2	0.6
PB1	#	509-517	965	0.2	LPSFGVSGI	97.93	2.1	0.6	1.2	0.2	0.7
PB1	#	510-518	965	0.2	PSFGVSGIN	97.82	2.2	0.6	1.2	0.3	0.8
PB1	#	511-519	965	0.2	SFGVSGINE	97.62	2.4	0.6	1.2	0.5	1
PB1	#	512-520	965	0.2	FGVSGINES	97.72	2.3	0.6	1	0.6	1
PB1	#	513-521	965	0.2	GVSGINESA	98.34	1.7	0.4	0.6	0.6	0.9
PB1	#	514-522	965	0.2	VSGINESAD	98.34	1.7	0.4	0.6	0.6	0.9
PB1	#	515-523	965	0.2	SGINESADM	98.03	2	0.4	0.9	0.6	1
PB1	#	516-524	965	0.2	GINESADMS	98.55	1.5	0.4	0.3	0.7	0.9
PB1	#	517-525	965	0.2	INESADMSI	97.82	2.2	0.7	0.9	0.5	0.9
PB1	#	518-526	965	0.2	NESADMSIG	98.24	1.8	0.7	0.5	0.5	0.8
PB1	&	519-527	965	0.6	ESADMSIGV	89.64	10.4	8.5	1.2	0.6	1
PB1	&	520-528	965	0.6	SADMSIGVT	89.53	10.5	8.5	1.6	0.4	0.9
PB1	&	521-529	965	0.6	ADMSIGVTV	89.43	10.6	8.6	1.6	0.4	0.9
PB1	&	522-530	965	0.6	DMSIGVTVI	89.53	10.5	8.6	1.6	0.3	0.8
PB1	&	523-531	964	0.7	MSIGVTVIK	87.55	12.4	8.6	3.5	0.3	0.9
PB1	&	524-532	964	0.7	SIGVTVIKN	87.66	12.3	8.6	3.2	0.5	1
PB1	&	525-533	964	0.8	IGVTVIKNN	87.03	13	8.6	3.9	0.4	1
PB1	&	526-534	964	0.7	GVTVIKNNM	87.76	12.2	8.6	3.2	0.4	0.9
PB1	&	527-535	964	0.8	VTVIKNNMI	87.34	12.7	8.6	3.5	0.5	1.1
PB1	#	528-536	964	0.3	TVIKNNMIN	96.06	3.9	2.1	1.3	0.5	0.9
PB1	#	529-537	964	0.3	VIKNNMINN	96.16	3.8	2.1	1.2	0.5	0.9
PB1	#	530-538	964	0.3	IKNNMINND	96.06	3.9	2.1	1.2	0.6	1
PB1	#	531-539	964	0.3	KNNMINNDL	95.95	4	2.1	1.2	0.7	1.1
PB1	#	532-540	965	0.2	NNMINNDLG	98.03	2	0.6	0.5	0.8	1.1
PB1	#	533-541	965	0.2	NMINNDLGP	98.24	1.8	0.6	0.5	0.6	0.9
PB1	#	534-542	965	0.1	MINNDLGPA	98.86	1.1	0.3	0.2	0.6	0.8
PB1	#	535-543	965	0.1	INNDLGPAT	98.86	1.1	0.3	0.2	0.6	0.8
PB1	#	536-544	965	0.1	NNDLGPATA	99.17	0.8	0.2	0	0.6	0.7
PB1	#	537-545	965	0.1	NDLGPATAQ	99.17	0.8	0.2	0.2	0.4	0.6
PB1	#	538-546	965	0.1	DLGPATAQM	99.38	0.6	0.2	0	0.4	0.5
PB1	#	539-547	965	<1	LGPATAQMA	99.59	0.4	0.2	0	0.2	0.3
PB1	#	540-548	965	<1	GPATAQMAL	99.69	0.3	0.2	0	0.1	0.2
PB1	#	541-549	965	<1	PATAQMALQ	99.69	0.3	0.2	0	0.1	0.2
PB1	#	542-550	965	<1	ATAQMALQL	99.69	0.3	0.2	0	0.1	0.2
PB1	#	543-551	965	<1	TAQMALQLF	99.69	0.3	0.2	0	0.1	0.2
PB1	#	544-552	965	0.1	AQMALQLFI	98.96	1	0.5	0.4	0.1	0.4
PB1	#	545-553	959	0.1	QMALQLFIK	98.85	1.1	0.5	0.4	0.2	0.5
PB1	#	546-554	959	0.1	MALQLFIKD	99.06	0.9	0.5	0.2	0.2	0.4
PB1	#	547-555	959	0.1	ALQLFIKDY	99.06	0.9	0.5	0.2	0.2	0.4
PB1	#	548-556	958	0.1	LQLFIKDYR	98.96	1	0.5	0.2	0.3	0.5
PB1	#	549-557	958	0.1	QLFIKDYRY	98.96	1	0.5	0.2	0.3	0.5
PB1	#	550-558	958	0.1	LFIKDYRYT	98.75	1.3	0.5	0.4	0.3	0.6
PB1	#	551-559	958	0.1	FIKDYRYTY	98.85	1.1	0.5	0.4	0.2	0.5
PB1	#	552-560	958	0.1	IKDYRYTYR	98.85	1.1	0.5	0.4	0.2	0.5
PB1	#	553-561	958	0.1	KDYRYTYRC	99.48	0.5	0.2	0	0.3	0.4
PB1	#	554-562	958	0.1	DYRYTYRCH	99.48	0.5	0.2	0	0.3	0.4
PB1	#	555-563	958	0.1	YRYTYRCHR	99.27	0.7	0.2	0	0.5	0.6
PB1	#	556-564	958	0.1	RYTYRCHRG	99.16	0.8	0.2	0	0.6	0.7
PB1	#	557-565	958	0.1	YTYRCHRGD	99.16	0.8	0.2	0	0.6	0.7
PB1	#	558-566	958	0.3	TYRCHRGDT	95.72	4.3	2.4	1.4	0.5	0.9
PB1	#	559-567	958	0.4	YRCHRGDTQ	95.51	4.5	2.4	1.4	0.7	1.1
PB1	#	560-568	958	0.4	RCHRGDTQI	95.2	4.8	2.4	1.6	0.8	1.4
PB1	#	561-569	958	0.5	CHRGDTQIQ	94.26	5.7	2.4	2.4	0.9	1.7
PB1	#	562-570	958	0.5	HRGDTQIQT	94.26	5.7	2.4	2.4	0.9	1.7
PB1	#	563-571	957	0.5	RGDTQIQTR	93.63	6.4	2.4	3.1	0.8	1.8
PB1	#	564-572	957	0.5	GDTQIQTRR	93.83	6.2	2.4	3.1	0.6	1.6
PB1	#	565-573	956	0.6	DTQIQTRRS	92.99	7	2.4	4	0.6	1.7
PB1	#	566-574	955	0.6	TQIQTRRSF	92.98	7	2.4	4	0.6	1.7
PB1	#	567-575	954	0.3	QIQTRRSFE	96.54	3.5	0.7	2.1	0.6	1.4
PB1	#	568-576	953	0.3	IQTRRSFEL	96.54	3.5	0.7	2.2	0.5	1.3
PB1	#	569-577	953	0.4	QTRRSFELK	95.38	4.6	1.4	2.7	0.5	1.3
PB1	#	570-578	952	0.3	TRRSFELKK	96.11	3.9	1.4	2	0.5	1.2
PB1	#	571-579	952	0.4	RRSFELKKL	96.01	4	1.4	2.2	0.4	1.2
PB1	#	572-580	952	0.3	RSFELKKLW	96.85	3.2	1.4	1.4	0.4	0.9
PB1	#	573-581	952	0.3	SFELKKLWE	96.11	3.9	1.4	2	0.5	1.2
PB1	#	574-582	952	0.3	FELKKLWEQ	96.85	3.2	1.4	1.3	0.5	1.1
PB1	#	575-583	952	0.3	ELKKLWEQT	96.85	3.2	1.4	1.3	0.5	1.1
PB1	#	576-584	952	0.5	LKKLWEQTR	92.86	7.1	3.7	2.8	0.6	1.4
PB1	#	577-585	952	0.5	KKLWEQTRS	93.17	6.8	3.7	2.6	0.5	1.2
PB1	#	578-586	952	0.4	KLWEQTRSK	94.33	5.7	3.7	1.5	0.5	1.2
PB1	#	579-587	953	0.4	LWEQTRSKA	94.54	5.5	3.7	1.3	0.5	1
PB1	#	580-588	953	0.4	WEQTRSKAG	94.44	5.6	3.7	1.3	0.6	1.2
PB1	#	581-589	953	0.4	EQTRSKAGL	94.33	5.7	3.7	1.3	0.7	1.3
PB1	#	582-590	952	0.4	QTRSKAGLL	95.17	4.8	3.6	0.6	0.6	1.1
PB1	#	583-591	952	0.5	TRSKAGLLV	92.33	7.7	3.6	3.5	0.6	1.2
PB1	#	584-592	951	0.5	RSKAGLLVS	92.11	7.9	3.6	3.7	0.6	1.3
PB1	#	585-593	950	0.3	SKAGLLVSD	95.89	4.1	2.8	0.6	0.6	1.1
PB1	#	586-594	950	0.3	KAGLLVSDG	95.89	4.1	2.8	0.6	0.6	1.1
PB1	#	587-595	950	0.3	AGLLVSDGG	96.11	3.9	2.8	0.2	0.8	1.1
PB1	#	588-596	950	0.3	GLLVSDGGP	96.21	3.8	2.8	0.2	0.7	0.9
PB1	#	589-597	950	0.3	LLVSDGGPN	96.32	3.7	2.8	0.2	0.6	0.8
PB1	#	590-598	950	0.3	LVSDGGPNL	96.21	3.8	2.8	0.4	0.5	0.8
PB1	#	591-599	950	0.3	VSDGGPNLY	96	4	2.7	0.4	0.8	1.2
PB1	#	592-600	949	0.1	SDGGPNLYN	98.63	1.4	0.2	0.4	0.7	1.1
PB1	#	593-601	950	0.1	DGGPNLYNI	98.84	1.2	0.2	0.2	0.7	0.9
PB1	#	594-602	951	0.1	GGPNLYNIR	98.95	1.1	0.2	0.2	0.6	0.8
PB1	#	595-603	951	0.1	GPNLYNIRN	98.95	1.1	0.2	0.2	0.6	0.8
PB1	#	596-604	951	0.1	PNLYNIRNL	98.84	1.2	0.3	0.2	0.6	0.8
PB1	#	597-605	950	0.1	NLYNIRNLH	98.63	1.4	0.3	0.4	0.6	0.9
PB1	#	598-606	950	0.2	LYNIRNLHI	98.21	1.8	0.5	0.5	0.7	1.1
PB1	#	599-607	950	0.2	YNIRNLHIP	98.21	1.8	0.5	0.5	0.7	1.1
PB1	#	600-608	950	0.2	NIRNLHIPE	98.21	1.8	0.5	0.3	0.9	1.2
PB1	#	601-609	950	0.3	IRNLHIPEV	95.68	4.3	2.7	0.5	1.1	1.3
PB1	#	602-610	949	0.4	RNLHIPEVC	95.57	4.4	2.6	0.5	1.3	1.5
PB1	#	603-611	949	0.4	NLHIPEVCL	95.57	4.4	2.6	0.5	1.3	1.5
PB1	#	604-612	949	0.4	LHIPEVCLK	95.57	4.4	2.6	0.5	1.3	1.5
PB1	#	605-613	949	0.4	HIPEVCLKW	95.47	4.5	2.6	0.7	1.2	1.5
PB1	#	606-614	949	0.4	IPEVCLKWE	95.15	4.8	2.6	1.1	1.2	1.6
PB1	#	607-615	949	0.4	PEVCLKWEL	95.47	4.5	2.6	0.7	1.2	1.6
PB1	#	608-616	949	0.4	EVCLKWELM	95.57	4.4	2.6	0.7	1.1	1.5
PB1	#	609-617	948	0.3	VCLKWELMD	95.68	4.3	2.7	0.8	0.7	1.2
PB1	#	610-618	948	0.6	CLKWELMDE	91.88	8.1	3.2	4.3	0.6	1.2
PB1	#	611-619	948	0.4	LKWELMDED	94.51	5.5	2.2	2.7	0.5	1.2
PB1	#	612-620	947	0.4	KWELMDEDY	94.61	5.4	2.2	2.7	0.4	1.1
PB1	#	613-621	947	0.6	WELMDEDYQ	92.71	7.3	2.2	4.6	0.4	1.3
PB1	#	614-622	947	0.7	ELMDEDYQG	91.55	8.4	2.2	5.6	0.6	1.6
PB1	#	615-623	946	0.6	LMDEDYQGR	91.97	8	2.2	5.2	0.6	1.5
PB1	#	616-624	946	0.6	MDEDYQGRL	92.07	7.9	2.2	5.2	0.5	1.4
PB1	#	617-625	946	0.6	DEDYQGRLC	92.07	7.9	2.2	5.2	0.5	1.4
PB1	#	618-626	946	0.6	EDYQGRLCN	92.07	7.9	2.2	5.2	0.5	1.4
PB1	#	619-627	946	0.3	DYQGRLCNP	96.19	3.8	1.2	2.1	0.5	1.1
PB1	#	620-628	946	0.3	YQGRLCNPL	96.09	3.9	1.2	2.2	0.5	1.1
PB1	#	621-629	945	0.4	QGRLCNPLN	95.98	4	1.2	2.2	0.6	1.2
PB1	#	622-630	945	0.2	GRLCNPLNP	97.78	2.2	1	0.6	0.6	1
PB1	#	623-631	945	0.1	RLCNPLNPF	98.94	1.1	0.4	0.2	0.4	0.6
PB1	#	624-632	946	0.2	LCNPLNPFV	98.1	1.9	0.8	0.6	0.4	0.7
PB1	#	625-633	946	0.3	CNPLNPFVS	96.93	3.1	0.8	1.7	0.5	1.1
PB1	#	626-634	946	0.3	NPLNPFVSH	96.83	3.2	0.8	1.7	0.6	1.2
PB1	#	627-635	945	0.4	PLNPFVSHK	95.34	4.7	1.5	2.4	0.7	1.4
PB1	#	628-636	944	0.4	LNPFVSHKE	95.23	4.8	1.4	2.4	1	1.6
PB1	#	629-637	944	0.5	NPFVSHKEI	94.07	5.9	1.6	3.3	1.1	1.6
PB1	#	630-638	944	0.5	PFVSHKEIE	93.54	6.5	1.6	3.9	1	1.6
PB1	#	631-639	944	0.5	FVSHKEIES	93.54	6.5	1.6	3.9	1	1.6
PB1	#	632-640	944	0.6	VSHKEIESV	92.48	7.5	1.6	4.9	1.1	1.9
PB1	#	633-641	944	0.6	SHKEIESVN	93.33	6.7	1.6	4	1.1	1.8
PB1	#	634-642	944	0.7	HKEIESVNN	91.31	8.7	3.2	4.6	1	1.6
PB1	#	635-643	944	0.7	KEIESVNNA	90.68	9.3	3.2	5.1	1.1	1.8
PB1	&	636-644	944	1.4	EIESVNNAV	66.53	33.5	25.4	6.8	1.3	2.2
PB1	&	637-645	944	1.4	IESVNNAVV	66.42	33.6	25.3	7.2	1.1	2.2
PB1	&	638-646	944	1.4	ESVNNAVVM	66.95	33.1	25.4	6.9	0.7	2
PB1	&	639-647	944	1.4	SVNNAVVMP	67.48	32.5	25.3	6.5	0.7	1.9
PB1	&	640-648	943	1.5	VNNAVVMPA	67.02	33	24.1	7.8	1.1	2.5
PB1	&	641-649	943	1.4	NNAVVMPAH	67.97	32	24.1	6.9	1.1	2.3
PB1	&	642-650	942	1.4	NAVVMPAHG	68.05	32	24.1	6.9	1	2.2
PB1	&	643-651	942	1.2	AVVMPAHGP	71.23	28.8	24.2	3.7	0.8	2
PB1	&	644-652	942	1.2	VVMPAHGPA	71.13	28.9	24.6	3.5	0.7	1.8
PB1	#	645-653	940	0.5	VMPAHGPAK	95	5	0.9	3.5	0.6	1.5
PB1	&	646-654	940	1	MPAHGPAKS	83.94	16.1	8.5	6.7	0.9	1.9
PB1	&	647-655	940	1.1	PAHGPAKSM	82.66	17.3	8.3	8	1.1	2.2
PB1	&	648-656	940	1.1	AHGPAKSME	82.66	17.3	8.3	8	1.1	2.2
PB1	&	649-657	940	1	HGPAKSMEY	84.36	15.6	8.3	6.5	0.9	1.8
PB1	&	650-658	939	1	GPAKSMEYD	84.24	15.8	8.3	6.5	1	1.9
PB1	&	651-659	938	1	PAKSMEYDA	84.12	15.9	8.3	6.5	1.1	2
PB1	&	652-660	938	1.1	AKSMEYDAV	83.37	16.6	8.3	7.1	1.2	2.2
PB1	&	653-661	938	1	KSMEYDAVA	83.8	16.2	8.3	6.6	1.3	2.1
PB1	&	654-662	939	1	SMEYDAVAT	84.56	15.4	8.3	5.9	1.3	2
PB1	#	655-663	939	0.4	MEYDAVATT	95.95	4	1.7	1.3	1.1	1.4
PB1	#	656-664	939	0.2	EYDAVATTH	98.3	1.7	0.6	0	1.1	1.2
PB1	#	657-665	939	0.2	YDAVATTHS	98.4	1.6	0.6	0	1	1.1
PB1	#	658-666	939	0.2	DAVATTHSW	98.4	1.6	0.6	0	1	1.1
PB1	#	659-667	939	0.5	AVATTHSWI	94.14	5.9	3.1	2	0.7	1.2
PB1	#	660-668	940	0.4	VATTHSWIP	94.15	5.9	3.1	2	0.7	1.2
PB1	#	661-669	940	0.4	ATTHSWIPK	94.89	5.1	3.1	1.4	0.6	1
PB1	#	662-670	940	0.4	TTHSWIPKR	95	5	3.1	1.4	0.5	0.9
PB1	#	663-671	940	0.4	THSWIPKRN	95.11	4.9	3.1	1.4	0.4	0.7
PB1	#	664-672	939	0.4	HSWIPKRNR	95.1	4.9	3.1	1.4	0.4	0.7
PB1	#	665-673	939	0.3	SWIPKRNRS	95.21	4.8	3.1	1.4	0.3	0.6
PB1	#	666-674	939	0.3	WIPKRNRSI	95.31	4.7	3.1	1.4	0.2	0.5
PB1	#	667-675	939	0.3	IPKRNRSIL	95.21	4.8	3.1	1.4	0.3	0.6
PB1	#	668-676	939	<1	PKRNRSILN	99.57	0.4	0.1	0	0.3	0.4
PB1	#	669-677	939	<1	KRNRSILNT	99.68	0.3	0.1	0	0.2	0.3
PB1	#	670-678	939	0.1	RNRSILNTS	99.04	1	0.3	0.2	0.4	0.6
PB1	#	671-679	939	0.1	NRSILNTSQ	98.94	1.1	0.3	0.2	0.5	0.7
PB1	#	672-680	939	0.2	RSILNTSQR	98.4	1.6	0.6	0.5	0.4	0.7
PB1	#	673-681	940	0.2	SILNTSQRG	98.4	1.6	0.6	0.5	0.4	0.7
PB1	#	674-682	940	0.2	ILNTSQRGI	98.19	1.8	0.6	0.7	0.4	0.9
PB1	#	675-683	940	0.2	LNTSQRGIL	98.19	1.8	0.6	0.7	0.4	0.9
PB1	#	676-684	940	0.2	NTSQRGILE	98.09	1.9	0.6	0.7	0.5	1
PB1	#	677-685	940	0.2	TSQRGILED	98.09	1.9	0.6	0.9	0.4	0.9
PB1	#	678-686	939	0.2	SQRGILEDE	98.08	1.9	0.6	0.9	0.4	0.9
PB1	#	679-687	939	0.2	QRGILEDEQ	98.19	1.8	0.6	0.6	0.5	0.9
PB1	#	680-688	939	0.2	RGILEDEQM	98.19	1.8	0.6	0.6	0.5	0.9
PB1	#	681-689	933	0.1	GILEDEQMY	98.71	1.3	0.3	0.3	0.6	0.9
PB1	#	682-690	932	0.2	ILEDEQMYQ	98.07	1.9	0.4	0.9	0.6	1.1
PB1	#	683-691	929	0.2	LEDEQMYQK	97.74	2.3	0.5	1	0.8	1.2
PB1	#	684-692	929	0.2	EDEQMYQKC	97.74	2.3	0.5	1	0.8	1.2
PB1	#	685-693	929	0.2	DEQMYQKCC	97.85	2.2	0.5	1	0.6	1.1
PB1	#	686-694	928	0.5	EQMYQKCCN	94.4	5.6	1.6	3.1	0.9	1.6
PB1	#	687-695	929	0.5	QMYQKCCNL	94.4	5.6	1.6	3.1	0.9	1.6
PB1	#	688-696	929	0.4	MYQKCCNLF	94.94	5.1	1.6	2.8	0.6	1.3
PB1	#	689-697	929	0.5	YQKCCNLFE	94.73	5.3	1.6	2.8	0.9	1.5
PB1	#	690-698	929	0.5	QKCCNLFEK	94.4	5.6	1.6	3.2	0.8	1.5
PB1	#	691-699	929	0.4	KCCNLFEKF	95.16	4.8	1.6	2.5	0.8	1.3
PB1	#	692-700	931	0.4	CCNLFEKFF	95.7	4.3	1.6	1.9	0.8	1.2
PB1	#	693-701	931	0.4	CNLFEKFFP	95.7	4.3	1.6	1.9	0.8	1.2
PB1	#	694-702	930	0.4	NLFEKFFPS	95.7	4.3	1.6	1.9	0.8	1.2
PB1	#	695-703	930	0.1	LFEKFFPSS	98.92	1.1	0.3	0.2	0.5	0.8
PB1	#	696-704	930	0.1	FEKFFPSSS	99.03	1	0.3	0.2	0.4	0.6
PB1	#	697-705	930	0.1	EKFFPSSSY	99.03	1	0.3	0.2	0.4	0.6
PB1	#	698-706	930	0.1	KFFPSSSYR	99.03	1	0.3	0.2	0.4	0.6
PB1	#	699-707	930	0.1	FFPSSSYRR	99.35	0.6	0.2	0	0.4	0.5
PB1	#	700-708	930	0.1	FPSSSYRRP	99.35	0.6	0.2	0	0.4	0.5
PB1	#	701-709	930	0.1	PSSSYRRPV	98.71	1.3	0.8	0.2	0.3	0.5
PB1	#	702-710	926	0.1	SSSYRRPVG	98.7	1.3	0.8	0.2	0.3	0.5
PB1	#	703-711	925	0.1	SSYRRPVGI	98.49	1.5	0.8	0.2	0.5	0.8
PB1	#	704-712	924	0.1	SYRRPVGIS	98.7	1.3	0.8	0	0.5	0.6
PB1	#	705-713	924	0.1	YRRPVGISS	98.59	1.4	0.8	0	0.6	0.8
PB1	#	706-714	924	0.1	RRPVGISSM	98.59	1.4	0.8	0	0.6	0.8
PB1	#	707-715	924	0.2	RPVGISSMV	97.29	2.7	1.3	1	0.4	0.8
PB1	#	708-716	924	0.3	PVGISSMVE	97.08	2.9	1.3	1	0.6	1
PB1	#	709-717	924	0.3	VGISSMVEA	96.97	3	1.3	1	0.8	1.1
PB1	#	710-718	923	0.2	GISSMVEAM	97.83	2.2	1.3	0.2	0.7	0.9
PB1	#	711-719	922	0.4	ISSMVEAMV	95.44	4.6	2.3	1.5	0.8	1.1
PB1	#	712-720	922	0.4	SSMVEAMVS	95.44	4.6	2.2	1.7	0.7	1.1
PB1	#	713-721	916	0.4	SMVEAMVSR	95.2	4.8	2.2	1.7	0.9	1.3
PB1	#	714-722	915	0.4	MVEAMVSRA	94.75	5.2	2.2	2.1	1	1.5
PB1	#	715-723	915	0.5	VEAMVSRAR	94.54	5.5	2.2	2.1	1.2	1.7
PB1	#	716-724	913	0.3	EAMVSRARI	96.17	3.8	2.2	0.5	1.1	1.4
PB1	#	717-725	911	0.3	AMVSRARID	96.16	3.8	2.2	0.5	1.1	1.4
PB1	#	718-726	909	0.4	MVSRARIDA	95.82	4.2	2.2	0.8	1.2	1.7
PB1	#	719-727	906	0.4	VSRARIDAR	95.81	4.2	2.3	0.8	1.1	1.5
PB1	#	720-728	905	0.2	SRARIDARI	98.01	2	0.3	0.6	1.1	1.4
PB1	#	721-729	905	0.2	RARIDARID	98.23	1.8	0.3	0.2	1.2	1.4
PB1	#	722-730	899	0.2	ARIDARIDF	98.44	1.6	0.3	0.2	1	1.2
PB1	#	723-731	899	0.1	RIDARIDFE	98.78	1.2	0.2	0	1	1.1
PB1	#	724-732	896	0.2	IDARIDFES	98.1	1.9	0.7	0.2	1	1.2
PB1	#	725-733	894	0.2	DARIDFESG	97.99	2	0.7	0.2	1.1	1.3
PB1	#	726-734	894	0.2	ARIDFESGR	97.54	2.5	0.7	0.9	0.9	1.2
PB1	#	727-735	892	0.2	RIDFESGRI	97.31	2.7	0.7	1.2	0.8	1.1
PB1	#	728-736	892	0.3	IDFESGRIK	96.86	3.1	0.7	1.7	0.8	1.2
PB1	#	729-737	892	0.4	DFESGRIKK	96.3	3.7	0.7	1.9	1.1	1.7
PB1	#	730-738	891	0.4	FESGRIKKE	95.85	4.2	0.7	2.4	1.1	1.9
PB1	#	731-739	890	0.5	ESGRIKKEE	95.28	4.7	0.7	2.7	1.3	2.2
PB1	#	732-740	889	0.5	SGRIKKEEF	95.05	4.9	0.7	2.9	1.3	2.4
PB1	#	733-741	882	0.6	GRIKKEEFA	93.42	6.6	2	3.1	1.5	2.6
PB1	#	734-742	879	0.6	RIKKEEFAE	93.4	6.6	2.2	3.1	1.4	2.5
PB1	#	735-743	876	0.6	IKKEEFAEI	93.61	6.4	2.2	2.9	1.4	2.5
PB1	#	736-744	873	0.8	KKEEFAEIM	90.38	9.6	2.5	5.6	1.5	2.7
PB1	&	737-745	866	0.9	KEEFAEIMK	88.57	11.4	3	6.9	1.5	2.8
PB1	&	738-746	862	1	EEFAEIMKI	87.47	12.5	3	8	1.5	2.7
PB1	&	739-747	860	0.9	EFAEIMKIC	87.91	12.1	3	7.8	1.3	2.3
PB1	&	740-748	854	0.9	FAEIMKICS	87.82	12.2	3	7.6	1.5	2.6
PB1	&	741-749	853	1	AEIMKICST	87.57	12.4	2.9	7.9	1.6	2.8
PB1	&	742-750	850	0.8	EIMKICSTI	89.88	10.1	2.9	5.5	1.6	2.6
PB1	&	743-751	849	0.8	IMKICSTIE	89.63	10.4	2.9	5.7	1.8	2.7
PB1	&	744-752	840	0.9	MKICSTIEE	88.93	11.1	3	6	2.1	3.1
PB1	#	745-753	830	0.7	KICSTIEEL	91.81	8.2	3	3.1	2	2.8
PB1	#	746-754	819	0.6	ICSTIEELR	93.53	6.5	1.7	2.9	1.8	2.7
PB1	#	747-755	817	0.5	CSTIEELRR	94.86	5.1	1.1	2.6	1.5	2.6
PB1	&	748-756	807	1.3	STIEELRRQ	69.89	30.1	24.9	3.5	1.7	2.9
PB1	&	749-757	770	1.5	TIEELRRQK	65.97	34	25.7	6.4	1.9	3.5
PB1-F2	&	1-9	243	3.1	MEQGQDTPW	35.39	64.6	18.1	42.8	3.7	10.3
PB1-F2	&	2-10	243	3.1	EQGQDTPWT	35.39	64.6	18.1	42.8	3.7	10.3
PB1-F2	&	3-11	243	2.7	QGQDTPWTQ	49.38	50.6	11.5	35.4	3.7	8.6
PB1-F2	&	4-12	243	2.5	GQDTPWTQS	51.44	48.6	12.3	33.3	2.9	7.4
PB1-F2	&	5-13	243	2.2	QDTPWTQST	60.91	39.1	9.5	28	1.6	6.2
PB1-F2	&	6-14	243	1.9	DTPWTQSTE	62.96	37	16.9	18.9	1.2	4.9
PB1-F2	&	7-15	243	1.3	TPWTQSTEH	80.66	19.3	5.8	11.1	2.5	5.3
PB1-F2	&	8-16	243	1.5	PWTQSTEHT	76.13	23.9	5.3	14.8	3.7	6.6
PB1-F2	&	9-17	243	1.3	WTQSTEHTN	80.25	19.8	5.8	10.3	3.7	6.6
PB1-F2	&	10-18	243	1.7	TQSTEHTNI	76.13	23.9	3.3	16.9	3.7	8.2
PB1-F2	&	11-19	243	1.9	QSTEHTNIQ	73.25	26.7	3.3	19.8	3.7	8.6
PB1-F2	&	12-20	243	1.7	STEHTNIQK	76.13	23.9	4.1	16.5	3.3	7.8
PB1-F2	&	13-21	243	2	TEHTNIQKR	71.19	28.8	4.1	18.9	5.8	9.9
PB1-F2	&	14-22	243	2.1	EHTNIQKRG	70.37	29.6	4.1	19.3	6.2	10.7
PB1-F2	&	15-23	243	2.4	HTNIQKRGS	67.49	32.5	3.7	22.6	6.2	13.2
PB1-F2	&	16-24	243	2.3	TNIQKRGSG	67.9	32.1	3.7	23.9	4.5	11.9
PB1-F2	&	17-25	243	2.2	NIQKRGSGQ	68.31	31.7	5.3	21.8	4.5	11.1
PB1-F2	&	18-26	243	2.6	IQKRGSGQQ	59.67	40.3	9.5	26.3	4.5	12.3
PB1-F2	&	19-27	243	2.4	QKRGSGQQT	62.14	37.9	9.9	23	4.9	11.1
PB1-F2	&	20-28	243	2.5	KRGSGQQTQ	61.73	38.3	9.9	21	7.4	12.8
PB1-F2	&	21-29	243	2.3	RGSGQQTQR	63.37	36.6	10.3	20.2	6.2	11.5
PB1-F2	&	22-30	243	2.2	GSGQQTQRL	64.61	35.4	10.3	19.8	5.3	9.9
PB1-F2	&	23-31	243	2.2	SGQQTQRLE	65.43	34.6	10.3	18.9	5.3	10.3
PB1-F2	&	24-32	243	1.9	GQQTQRLEH	68.72	31.3	10.7	16.5	4.1	8.2
PB1-F2	&	25-33	243	2.2	QQTQRLEHP	66.26	33.7	9.9	17.3	6.6	11.1
PB1-F2	&	26-34	243	2.2	QTQRLEHPN	65.02	35	10.7	17.3	7	11.5
PB1-F2	&	27-35	243	1.7	TQRLEHPNS	77.37	22.6	5.8	10.3	6.6	10.3
PB1-F2	&	28-36	243	1.9	QRLEHPNST	72.43	27.6	5.8	15.2	6.6	10.3
PB1-F2	&	29-37	243	2.5	RLEHPNSTR	62.55	37.4	9.1	23.5	4.9	11.5
PB1-F2	&	30-38	243	2.4	LEHPNSTRL	62.55	37.4	9.1	23.9	4.5	10.7
PB1-F2	&	31-39	243	2.3	EHPNSTRLM	63.79	36.2	10.3	21	4.9	10.3
PB1-F2	&	32-40	243	2.7	HPNSTRLMD	56.38	43.6	8.2	29.2	6.2	11.1
PB1-F2	&	33-41	243	2.8	PNSTRLMDH	54.73	45.3	8.2	31.3	5.8	11.1
PB1-F2	&	34-42	243	2.9	NSTRLMDHY	52.67	47.3	8.2	34.2	4.9	11.5
PB1-F2	&	35-43	243	3.1	STRLMDHYL	52.26	47.7	7.4	33.7	6.6	14.4
PB1-F2	&	36-44	242	3.4	TRLMDHYLR	45.45	54.5	7.4	39.3	7.9	15.3
PB1-F2	&	37-45	242	3.4	RLMDHYLRI	46.69	53.3	7.4	37.6	8.3	16.1
PB1-F2	&	38-46	242	3	LMDHYLRIM	50.83	49.2	11.2	28.9	9.1	15.3
PB1-F2	&	39-47	247	3.1	MDHYLRIMS	49.8	50.2	11.3	29.1	9.7	16.2
PB1-F2	&	40-48	247	3.3	DHYLRIMSP	48.58	51.4	11.7	30	9.7	17.8
PB1-F2	&	41-49	247	2.8	HYLRIMSPV	60.32	39.7	7.7	22.3	9.7	16.6
PB1-F2	&	42-50	247	3.4	YLRIMSPVG	31.98	68	29.1	28.3	10.5	18.2
PB1-F2	&	43-51	247	3.2	LRIMSPVGM	36.03	64	30	24.7	9.3	16.2
PB1-F2	&	44-52	247	3	RIMSPVGMH	38.06	61.9	30.4	25.1	6.5	13.4
PB1-F2	&	45-53	248	2.7	IMSPVGMHK	43.95	56	30.6	19	6.5	12.9
PB1-F2	&	46-54	248	2.4	MSPVGMHKQ	47.58	52.4	31.9	15.3	5.2	11.3
PB1-F2	&	47-55	248	2.4	SPVGMHKQI	48.39	51.6	31	16.1	4.4	10.9
PB1-F2	&	48-56	248	2.4	PVGMHKQIV	49.19	50.8	30.2	16.1	4.4	10.5
PB1-F2	&	49-57	248	2.3	VGMHKQIVY	51.61	48.4	25.8	19	3.6	8.9
PB1-F2	&	50-58	247	2.3	GMHKQIVYW	51.42	48.6	25.9	19	3.6	8.9
PB1-F2	&	51-59	247	1.5	MHKQIVYWK	76.92	23.1	8.5	10.9	3.6	7.3
PB1-F2	&	52-60	247	1.6	HKQIVYWKQ	75.71	24.3	8.1	11.7	4.5	8.5
PB1-F2	&	53-61	247	1.6	KQIVYWKQW	75.71	24.3	8.1	11.7	4.5	8.5
PB1-F2	&	54-62	247	1.5	QIVYWKQWL	79.35	20.6	7.7	8.1	4.9	8.5
PB1-F2	&	55-63	247	1.5	IVYWKQWLS	78.54	21.5	8.1	9.7	3.6	7.3
PB1-F2	&	56-64	247	1.3	VYWKQWLSL	80.97	19	6.5	9.3	3.2	6.9
PB1-F2	&	57-65	247	1.3	YWKQWLSLK	80.97	19	7.3	7.7	4	6.9
PB1-F2	&	58-66	247	1.4	WKQWLSLKN	81.78	18.2	4.5	8.9	4.9	8.1
PB1-F2	&	59-67	247	1.4	KQWLSLKNP	80.16	19.8	6.1	7.7	6.1	8.9
PB1-F2	&	60-68	246	1.4	QWLSLKNPT	80.49	19.5	5.7	7.7	6.1	8.9
PB1-F2	&	61-69	246	1.4	WLSLKNPTQ	80.49	19.5	5.7	7.7	6.1	8.9
PB1-F2	&	62-70	246	1.8	LSLKNPTQG	74.8	25.2	5.7	12.6	6.9	10.6
PB1-F2	&	63-71	246	1.9	SLKNPTQGS	73.98	26	5.7	13	7.3	11
PB1-F2	&	64-72	245	1.8	LKNPTQGSL	75.1	24.9	5.7	13.5	5.7	9.4
PB1-F2	&	65-73	245	2.2	KNPTQGSLK	66.53	33.5	8.2	18.8	6.5	10.6
PB1-F2	&	66-74	247	2.7	NPTQGSLKT	51.42	48.6	15.4	27.1	6.1	11.7
PB1-F2	&	67-75	247	2.9	PTQGSLKTR	46.15	53.8	13.8	34.8	5.3	10.9
PB1-F2	&	68-76	247	2.8	TQGSLKTRV	46.96	53	13.8	34.4	4.9	10.1
PB1-F2	&	69-77	248	2.9	QGSLKTRVL	47.18	52.8	13.7	33.5	5.6	10.9
PB1-F2	&	70-78	248	2.8	GSLKTRVLK	47.98	52	13.7	34.3	4	9.7
PB1-F2	&	71-79	248	2.7	SLKTRVLKR	47.58	52.4	14.9	33.5	4	8.9
PB1-F2	&	72-80	247	2.7	LKTRVLKRW	47.77	52.2	15.8	32.8	3.6	8.1
PB1-F2	&	73-81	247	2.8	KTRVLKRWK	45.75	54.3	14.6	36	3.6	8.9
PB1-F2	&	74-82	246	2.5	TRVLKRWKL	53.25	46.7	14.6	29.7	2.4	8.5
PB1-F2	&	75-83	246	2.2	RVLKRWKLF	63.82	36.2	8.5	24.4	3.3	8.1
PB1-F2	&	76-84	246	2.1	VLKRWKLFN	66.26	33.7	8.5	22	3.3	7.7
PB1-F2	&	77-85	246	2	LKRWKLFNK	66.67	33.3	8.5	20.3	4.5	8.1
PB1-F2	&	78-86	245	2.2	KRWKLFNKQ	64.49	35.5	9.4	21.2	4.9	8.6
PB1-F2	&	79-87	245	2.2	RWKLFNKQE	63.67	36.3	9.4	21.6	5.3	9.4
PB1-F2	&	80-88	244	2	WKLFNKQEW	68.44	31.6	9.8	16.8	4.9	8.6
PB1-F2	&	81-89	243	2.6	KLFNKQEWI	54.32	45.7	14.8	25.5	5.3	10.7
PB1-F2	&	82-90	243	2.6	LFNKQEWIN	53.91	46.1	14.8	25.5	5.8	11.1
PA	#	1-9	837	0.4	MEDFVRQCF	95.34	4.7	1.1	2.7	0.8	1.7
PA	#	2-10	845	0.4	EDFVRQCFN	95.15	4.9	1.1	2.7	1.1	1.9
PA	#	3-11	856	0.4	DFVRQCFNP	95.09	4.9	1.1	2.8	1.1	1.9
PA	#	4-12	885	0.4	FVRQCFNPM	95.59	4.4	1	2.7	0.7	1.5
PA	#	5-13	892	0.7	VRQCFNPMI	90.25	9.8	5.3	3.6	0.9	1.8
PA	&	6-14	904	0.8	RQCFNPMIV	88.83	11.2	5.2	5.2	0.8	1.5
PA	&	7-15	904	0.8	QCFNPMIVE	88.72	11.3	5.2	5.2	0.9	1.7
PA	&	8-16	934	0.7	CFNPMIVEL	88.97	11	5.4	4.9	0.7	1.4
PA	&	9-17	938	0.7	FNPMIVELA	88.91	11.1	5.3	4.9	0.9	1.5
PA	&	10-18	954	0.9	NPMIVELAE	87.53	12.5	5.2	6.6	0.6	1.8
PA	&	11-19	977	0.8	PMIVELAEK	88.54	11.5	5.1	5.8	0.5	1.5
PA	&	12-20	1014	1	MIVELAEKA	86.09	13.9	4.8	8.6	0.5	1.6
PA	&	13-21	1024	1	IVELAEKAM	86.23	13.8	4.8	8.3	0.7	1.7
PA	#	14-22	1030	0.7	VELAEKAMK	90.97	9	2.9	5.5	0.6	1.5
PA	#	15-23	1041	0.5	ELAEKAMKE	93.85	6.1	2.9	2.5	0.8	1.3
PA	#	16-24	1042	0.5	LAEKAMKEY	93.95	6	2.9	2.5	0.7	1.2
PA	#	17-25	1044	0.5	AEKAMKEYG	93.87	6.1	2.9	2.5	0.8	1.3
PA	#	18-26	1047	0.5	EKAMKEYGE	93.89	6.1	2.9	2.5	0.8	1.3
PA	&	19-27	1047	1.2	KAMKEYGED	77.94	22.1	15.3	5.5	1.2	2.1
PA	&	20-28	1052	1.2	AMKEYGEDP	78.14	21.9	15.6	4.8	1.4	2.2
PA	&	21-29	1056	1.1	MKEYGEDPK	79.07	20.9	15.4	4.1	1.4	2.2
PA	&	22-30	1057	1.2	KEYGEDPKI	78.43	21.6	15	5.4	1.1	2.2
PA	&	23-31	1058	1.1	EYGEDPKIE	79.02	21	15.1	4.9	0.9	2
PA	&	24-32	1061	1.1	YGEDPKIET	78.79	21.2	15.1	5.1	1	2.1
PA	&	25-33	1061	1.1	GEDPKIETN	78.89	21.1	15.1	5.1	0.9	2
PA	&	26-34	1062	1.1	EDPKIETNK	78.81	21.2	15.1	5.1	1	2.1
PA	&	27-35	1062	1.2	DPKIETNKF	78.63	21.4	15.1	5.3	1	2.2
PA	#	28-36	1062	0.4	PKIETNKFA	95.57	4.4	0.9	2.6	0.8	1.6
PA	#	29-37	1062	0.4	KIETNKFAA	95.67	4.3	0.9	2.6	0.8	1.5
PA	#	30-38	1062	0.4	IETNKFAAI	95.67	4.3	1.5	2.1	0.8	1.4
PA	#	31-39	1062	0.2	ETNKFAAIC	97.74	2.3	0.6	0.9	0.8	1.2
PA	#	32-40	1062	0.3	TNKFAAICT	97.55	2.4	0.6	1.1	0.8	1.3
PA	#	33-41	1062	0.2	NKFAAICTH	97.93	2.1	0.6	0.8	0.7	1.1
PA	#	34-42	1062	0.2	KFAAICTHL	97.74	2.3	0.6	1	0.7	1.2
PA	#	35-43	1062	0.2	FAAICTHLE	97.65	2.4	0.6	1	0.8	1.3
PA	#	36-44	1062	0.3	AAICTHLEV	97.36	2.6	0.6	1.1	0.9	1.5
PA	#	37-45	1063	0.2	AICTHLEVC	97.84	2.2	0.3	0.8	1	1.5
PA	#	38-46	1063	0.2	ICTHLEVCF	98.02	2	0.3	0.7	1	1.4
PA	#	39-47	1064	0.2	CTHLEVCFM	98.5	1.5	0.3	0.4	0.8	1.1
PA	#	40-48	1067	0.2	THLEVCFMY	98.41	1.6	0.3	0.4	0.9	1.2
PA	#	41-49	1070	0.2	HLEVCFMYS	98.22	1.8	0.4	0.5	0.9	1.2
PA	#	42-50	1072	0.2	LEVCFMYSD	98.23	1.8	0.4	0.5	0.9	1.2
PA	#	43-51	1072	0.2	EVCFMYSDF	98.23	1.8	0.4	0.6	0.8	1.1
PA	#	44-52	1073	0.2	VCFMYSDFH	98.32	1.7	0.4	0.6	0.7	1
PA	#	45-53	1073	0.1	CFMYSDFHF	98.6	1.4	0.4	0.3	0.7	0.9
PA	#	46-54	1075	0.2	FMYSDFHFI	98.42	1.6	0.4	0.6	0.7	0.9
PA	#	47-55	1076	0.2	MYSDFHFID	98.33	1.7	0.4	0.7	0.6	0.9
PA	#	48-56	1076	0.3	YSDFHFIDE	97.4	2.6	0.7	1.3	0.6	1.1
PA	#	49-57	1076	0.3	SDFHFIDER	96.28	3.7	1	2	0.7	1.3
PA	&	50-58	1077	1.3	DFHFIDERS	57.85	42.2	38	3.2	0.9	1.8
PA	&	51-59	1077	1.4	FHFIDERSE	57.85	42.2	36.4	4.9	0.8	1.9
PA	&	52-60	1076	1.4	HFIDERSES	57.9	42.1	36.4	4.9	0.7	1.8
PA	&	53-61	1076	1.8	FIDERSESI	57.43	42.6	28.6	12.3	1.7	2.9
PA	&	54-62	1076	1.9	IDERSESII	56.88	43.1	28.2	13.5	1.5	3
PA	&	55-63	1075	2.1	DERSESIIV	56.93	43.1	23.3	18.1	1.7	3.3
PA	&	56-64	1075	2.2	ERSESIIVE	56.56	43.4	23.3	18.4	1.8	3.5
PA	&	57-65	1075	2.2	RSESIIVES	57.02	43	22.7	18.6	1.7	3.4
PA	&	58-66	1075	2.2	SESIIVESG	57.3	42.7	22.7	18.4	1.6	3.5
PA	&	59-67	1075	1.4	ESIIVESGD	80.56	19.4	5	13.4	1	2.9
PA	&	60-68	1074	1.4	SIIVESGDP	80.26	19.7	5	13.6	1.1	2.9
PA	&	61-69	1074	1.4	IIVESGDPN	80.26	19.7	5	13.5	1.2	2.9
PA	&	62-70	1074	1.2	IVESGDPNA	84.64	15.4	2.9	11.4	1.1	2.5
PA	&	63-71	1073	1.1	VESGDPNAL	85.74	14.3	2.9	10.3	1.1	2.4
PA	#	64-72	1074	0.7	ESGDPNALL	91.06	8.9	2.5	5.7	0.7	2
PA	#	65-73	1074	0.7	SGDPNALLK	91.43	8.6	2.5	5.6	0.5	1.8
PA	#	66-74	1074	0.6	GDPNALLKH	92.36	7.6	2.5	4.7	0.4	1.5
PA	#	67-75	1074	0.5	DPNALLKHR	93.76	6.2	2.5	3.3	0.5	1.2
PA	#	68-76	1075	0.5	PNALLKHRF	94.33	5.7	2.5	2.6	0.6	1.2
PA	#	69-77	1076	0.3	NALLKHRFE	95.72	4.3	2.5	1	0.7	1.1
PA	#	70-78	1076	0.3	ALLKHRFEI	95.91	4.1	2.5	0.8	0.7	1
PA	#	71-79	1076	0.1	LLKHRFEII	99.16	0.8	0.2	0	0.7	0.7
PA	#	72-80	1077	0.1	LKHRFEIIE	99.16	0.8	0.2	0	0.6	0.7
PA	#	73-81	1077	0.1	KHRFEIIEG	98.98	1	0.2	0.2	0.6	0.8
PA	#	74-82	1077	0.1	HRFEIIEGR	99.07	0.9	0.3	0.2	0.5	0.6
PA	#	75-83	1077	0.1	RFEIIEGRD	98.89	1.1	0.3	0.2	0.6	0.8
PA	#	76-84	1077	0.1	FEIIEGRDR	98.98	1	0.3	0.2	0.6	0.7
PA	#	77-85	1077	0.2	EIIEGRDRT	97.86	2.1	1.1	0.5	0.6	0.8
PA	#	78-86	1077	0.4	IIEGRDRTM	95.45	4.5	2.3	1.5	0.7	1.1
PA	#	79-87	1077	0.4	IEGRDRTMA	95.36	4.6	2.3	1.7	0.6	1.1
PA	#	80-88	1077	0.4	EGRDRTMAW	95.26	4.7	2.3	1.7	0.7	1.2
PA	#	81-89	1077	0.4	GRDRTMAWT	95.26	4.7	2.3	1.7	0.7	1.2
PA	#	82-90	1077	0.4	RDRTMAWTV	95.08	4.9	2.3	1.6	1	1.5
PA	#	83-91	1077	0.6	DRTMAWTVV	91.92	8.1	3	4	1.1	1.8
PA	#	84-92	1077	0.6	RTMAWTVVN	91.92	8.1	3	4	1.1	1.8
PA	#	85-93	1077	0.6	TMAWTVVNS	91.92	8.1	3	4	1.1	1.8
PA	#	86-94	1077	0.7	MAWTVVNSI	91.09	8.9	3.1	4.8	1	1.7
PA	#	87-95	1077	0.5	AWTVVNSIC	93.41	6.6	3.1	2.6	0.9	1.5
PA	#	88-96	1077	0.5	WTVVNSICN	93.22	6.8	3.1	3	0.7	1.4
PA	#	89-97	1077	0.5	TVVNSICNT	93.22	6.8	3.1	3	0.7	1.4
PA	#	90-98	1077	0.5	VVNSICNTT	93.13	6.9	3.1	3	0.8	1.5
PA	#	91-99	1083	0.7	VNSICNTTG	91.87	8.1	3	4.3	0.7	1.6
PA	#	92-100	1083	0.7	NSICNTTGV	90.77	9.2	2.6	5.9	0.7	1.6
PA	&	93-101	1085	1.7	SICNTTGVE	59.26	40.7	30.5	9.2	1	2.3
PA	&	94-102	1085	1.7	ICNTTGVEK	59.26	40.7	30.5	9.2	1	2.3
PA	&	95-103	1085	1.5	CNTTGVEKP	60.74	39.3	30.8	7.5	1	1.9
PA	&	96-104	1085	1.5	NTTGVEKPK	61.01	39	30.4	7.5	1.1	2
PA	&	97-105	1085	1.8	TTGVEKPKF	60.55	39.4	27.7	10.3	1.4	2.8
PA	&	98-106	1085	1.8	TGVEKPKFL	60.37	39.6	27.7	10.6	1.3	2.8
PA	&	99-107	1085	1.7	GVEKPKFLP	60.37	39.6	27.7	10.8	1.1	2.6
PA	&	100-108	1085	1.7	VEKPKFLPD	61.11	38.9	28.5	9.4	1	2.4
PA	&	101-109	1085	1.4	EKPKFLPDL	64.06	35.9	28.7	6.5	0.8	1.8
PA	#	102-110	1086	0.4	KPKFLPDLY	94.01	6	3.6	1.7	0.6	1.2
PA	#	103-111	1086	0.5	PKFLPDLYD	94.01	6	3.6	1.7	0.6	1.2
PA	#	104-112	1086	0.4	KFLPDLYDY	94.11	5.9	3.6	1.7	0.6	1.1
PA	#	105-113	1086	0.4	FLPDLYDYK	94.29	5.7	3.7	1.7	0.3	0.8
PA	#	106-114	1086	0.1	LPDLYDYKE	98.8	1.2	0.3	0.6	0.3	0.6
PA	#	107-115	1086	0.5	PDLYDYKEN	94.11	5.9	2.8	2.8	0.4	1.1
PA	#	108-116	1086	0.5	DLYDYKENR	94.11	5.9	2.8	2.8	0.4	1.1
PA	#	109-117	1086	0.4	LYDYKENRF	94.38	5.6	2.8	2.5	0.4	1
PA	#	110-118	1086	0.5	YDYKENRFI	93.28	6.7	2.8	3.6	0.4	1.1
PA	#	111-119	1086	0.5	DYKENRFIE	93.28	6.7	2.8	3.6	0.4	1.1
PA	#	112-120	1086	0.5	YKENRFIEI	93.19	6.8	2.8	3.6	0.5	1.2
PA	#	113-121	1086	0.5	KENRFIEIG	93.19	6.8	2.8	3.6	0.5	1.2
PA	#	114-122	1086	0.5	ENRFIEIGV	93.19	6.8	2.8	3.4	0.6	1.3
PA	#	115-123	1086	0.5	NRFIEIGVT	93.28	6.7	2.8	3.2	0.7	1.3
PA	#	116-124	1086	0.2	RFIEIGVTR	98.25	1.7	1.1	0	0.6	0.7
PA	#	117-125	1086	0.2	FIEIGVTRR	98.16	1.8	1.1	0	0.7	0.8
PA	#	118-126	1086	0.2	IEIGVTRRE	98.07	1.9	1.1	0	0.8	0.9
PA	#	119-127	1086	0.2	EIGVTRREV	97.79	2.2	0.9	0.6	0.7	1
PA	#	120-128	1086	0.2	IGVTRREVH	97.51	2.5	0.9	0.9	0.6	1.1
PA	&	121-129	1086	1.3	GVTRREVHT	56.08	43.9	39.3	4.1	0.6	1.4
PA	&	122-130	1086	1.3	VTRREVHTY	56.08	43.9	39.3	4.1	0.6	1.4
PA	&	123-131	1086	1.3	TRREVHTYY	56.08	43.9	39.4	4.1	0.5	1.3
PA	&	124-132	1086	1.3	RREVHTYYL	55.71	44.3	39.5	4.4	0.4	1.3
PA	&	125-133	1086	1.4	REVHTYYLE	55.16	44.8	39.4	5	0.5	1.5
PA	&	126-134	1086	1.4	EVHTYYLEK	55.16	44.8	39.4	5.1	0.4	1.4
PA	&	127-135	1085	1.4	VHTYYLEKA	54.75	45.3	39.5	5.4	0.3	1.5
PA	&	128-136	1085	1.4	HTYYLEKAN	54.75	45.3	40.5	4.5	0.3	1.5
PA	&	129-137	1085	1.3	TYYLEKANK	55.21	44.8	40.5	4.1	0.3	1.3
PA	#	130-138	1083	0.2	YYLEKANKI	97.32	2.7	0.9	1.5	0.3	0.8
PA	#	131-139	1083	0.2	YLEKANKIK	97.32	2.7	0.9	1.5	0.3	0.8
PA	#	132-140	1083	0.3	LEKANKIKS	97.14	2.9	0.9	1.5	0.5	1
PA	#	133-141	1083	0.3	EKANKIKSE	97.23	2.8	0.9	1.4	0.5	1
PA	#	134-142	1082	0.5	KANKIKSEK	92.88	7.1	2.5	4.3	0.4	1.1
PA	#	135-143	1083	0.5	ANKIKSEKT	92.89	7.1	2.5	4.2	0.5	1.2
PA	#	136-144	1084	0.5	NKIKSEKTH	93.27	6.7	2.5	3.8	0.5	1
PA	#	137-145	1085	0.4	KIKSEKTHI	94.29	5.7	2.5	2.7	0.6	0.9
PA	#	138-146	1085	0.4	IKSEKTHIH	94.29	5.7	2.5	2.7	0.6	0.9
PA	#	139-147	1087	0.4	KSEKTHIHI	94.02	6	2.5	2.9	0.6	1.1
PA	#	140-148	1087	0.5	SEKTHIHIF	93.93	6.1	2.5	2.9	0.7	1.2
PA	#	141-149	1087	0.5	EKTHIHIFS	94.02	6	2.5	3	0.5	1
PA	#	142-150	1087	0.4	KTHIHIFSF	94.3	5.7	2.5	2.8	0.5	0.9
PA	#	143-151	1088	0.2	THIHIFSFT	98.35	1.7	0.7	0.4	0.6	0.8
PA	#	144-152	1088	0.2	HIHIFSFTG	98.44	1.6	0.7	0.4	0.5	0.7
PA	#	145-153	1088	0.2	IHIFSFTGE	98.44	1.6	0.7	0.4	0.5	0.7
PA	#	146-154	1088	0.1	HIFSFTGEE	98.53	1.5	0.7	0.4	0.4	0.6
PA	#	147-155	1088	0.2	IFSFTGEEM	98.35	1.7	0.7	0.4	0.6	0.8
PA	#	148-156	1088	0.1	FSFTGEEMA	98.44	1.6	0.7	0.2	0.6	0.8
PA	#	149-157	1088	0.2	SFTGEEMAT	98.35	1.7	0.7	0.2	0.7	0.9
PA	#	150-158	1088	0.3	FTGEEMATK	96.78	3.2	1.7	0.7	0.7	0.9
PA	#	151-159	1088	0.4	TGEEMATKA	95.68	4.3	1.7	1.6	1	1.3
PA	#	152-160	1088	0.3	GEEMATKAD	96.14	3.9	1.7	1.1	1	1.3
PA	#	153-161	1088	0.4	EEMATKADY	95.13	4.9	1.7	2	1.1	1.5
PA	#	154-162	1088	0.5	EMATKADYT	94.3	5.7	1.7	2.8	1.1	1.7
PA	#	155-163	1088	0.6	MATKADYTL	93.11	6.9	1.7	4	1.3	2
PA	#	156-164	1088	0.6	ATKADYTLD	93.11	6.9	1.7	4	1.3	2
PA	#	157-165	1088	0.6	TKADYTLDE	92.56	7.4	1.7	4.6	1.2	2
PA	#	158-166	1088	0.6	KADYTLDEE	92.74	7.3	1.7	4.8	0.8	1.7
PA	#	159-167	1088	0.5	ADYTLDEES	94.39	5.6	1.2	3.7	0.7	1.6
PA	#	160-168	1088	0.4	DYTLDEESR	94.94	5.1	1.7	2.8	0.5	1.1
PA	#	161-169	1088	0.4	YTLDEESRA	95.31	4.7	1.7	2.4	0.6	1
PA	#	162-170	1088	0.3	TLDEESRAR	96.23	3.8	1.7	1.5	0.6	0.9
PA	#	163-171	1088	0.2	LDEESRARI	97.06	2.9	1.7	0.6	0.6	0.7
PA	#	164-172	1088	0.1	DEESRARIK	98.9	1.1	0.6	0	0.5	0.6
PA	#	165-173	1088	0.1	EESRARIKT	99.08	0.9	0.6	0	0.3	0.4
PA	#	166-174	1088	0.1	ESRARIKTR	99.45	0.6	0.1	0	0.5	0.6
PA	#	167-175	1088	0.1	SRARIKTRL	99.26	0.7	0.1	0	0.6	0.7
PA	#	168-176	1088	0.2	RARIKTRLF	96.97	3	2.1	0	0.9	1
PA	#	169-177	1088	0.3	ARIKTRLFT	96.88	3.1	2.1	0	1	1.1
PA	#	170-178	1088	0.3	RIKTRLFTI	96.32	3.7	2.1	0.7	0.8	1.1
PA	#	171-179	1088	0.3	IKTRLFTIR	96.42	3.6	2.1	0.7	0.7	1
PA	#	172-180	1088	0.3	KTRLFTIRQ	96.42	3.6	2.1	0.7	0.7	1
PA	#	173-181	1088	0.3	TRLFTIRQE	96.42	3.6	2.1	0.7	0.7	1
PA	#	174-182	1087	0.3	RLFTIRQEM	96.41	3.6	2.1	0.7	0.7	1
PA	#	175-183	1087	0.3	LFTIRQEMA	96.6	3.4	2.1	0.6	0.7	0.9
PA	#	176-184	1087	0.4	FTIRQEMAS	95.58	4.4	2	1.5	0.9	1.3
PA	#	177-185	1086	0.3	TIRQEMASR	96.87	3.1	0.7	1.6	0.8	1.2
PA	#	178-186	1086	0.3	IRQEMASRG	96.96	3	0.6	1.6	0.8	1.2
PA	#	179-187	1086	0.3	RQEMASRGL	97.05	2.9	0.6	1.5	0.8	1.2
PA	#	180-188	1086	0.3	QEMASRGLW	97.05	2.9	0.6	1.5	0.8	1.2
PA	#	181-189	1086	0.3	EMASRGLWD	97.05	2.9	0.6	1.5	0.8	1.2
PA	#	182-190	1086	0.3	MASRGLWDS	96.41	3.6	0.6	2.1	0.8	1.3
PA	#	183-191	1086	0.3	ASRGLWDSF	96.41	3.6	0.6	2.1	0.8	1.3
PA	#	184-192	1086	0.4	SRGLWDSFR	96.04	4	0.6	2.4	0.9	1.5
PA	#	185-193	1086	0.3	RGLWDSFRQ	97.24	2.8	0.6	1.4	0.7	1.1
PA	#	186-194	1087	0.2	GLWDSFRQS	97.88	2.1	0.6	0.8	0.7	1
PA	#	187-195	1087	0.2	LWDSFRQSE	97.98	2	0.6	0.8	0.6	0.9
PA	#	188-196	1087	0.2	WDSFRQSER	98.25	1.7	0.6	0.4	0.8	1
PA	#	189-197	1087	0.2	DSFRQSERG	97.7	2.3	0.6	0.7	1	1.3
PA	#	190-198	1087	0.2	SFRQSERGE	97.7	2.3	0.6	0.7	1	1.3
PA	#	191-199	1086	0.2	FRQSERGEE	98.07	1.9	0.5	0.6	0.9	1.2
PA	#	192-200	1086	0.2	RQSERGEET	97.88	2.1	0.5	0.6	1.1	1.4
PA	#	193-201	1086	0.2	QSERGEETI	97.79	2.2	0.4	0.7	1.1	1.5
PA	#	194-202	1086	0.2	SERGEETIE	97.79	2.2	0.4	0.7	1.1	1.5
PA	#	195-203	1084	0.2	ERGEETIEE	97.79	2.2	0.4	0.7	1.1	1.5
PA	&	196-204	1085	1.2	RGEETIEEK	55.21	44.8	42.6	1.1	1.1	1.6
PA	&	197-205	1085	1.2	GEETIEEKF	55.21	44.8	42.7	1.2	0.9	1.4
PA	&	198-206	1085	1.2	EETIEEKFE	54.56	45.4	42.9	1.7	0.9	1.5
PA	&	199-207	1085	1.2	ETIEEKFEI	54.1	45.9	42.9	2.1	0.8	1.5
PA	&	200-208	1085	1.4	TIEEKFEIT	53.36	46.6	42.2	3.2	1.2	2.1
PA	&	201-209	1085	1.4	IEEKFEITG	53.36	46.6	42.4	3.2	1	1.9
PA	&	202-210	1085	1.3	EEKFEITGT	53.55	46.5	42.9	2.5	1.1	1.8
PA	&	203-211	1085	1.3	EKFEITGTM	53.55	46.5	42.7	2.3	1.5	2
PA	&	204-212	1088	1.4	KFEITGTMR	53.68	46.3	41.7	3	1.6	2.3
PA	#	205-213	1088	0.5	FEITGTMRR	94.76	5.2	0.8	2.9	1.5	2.3
PA	#	206-214	1087	0.5	EITGTMRRL	94.85	5.2	0.8	2.8	1.6	2.4
PA	#	207-215	1087	0.4	ITGTMRRLA	95.77	4.2	0.7	2	1.5	2.2
PA	#	208-216	1085	0.4	TGTMRRLAD	95.76	4.2	0.7	2	1.5	2.2
PA	#	209-217	1085	0.3	GTMRRLADQ	97.05	2.9	0.5	1.3	1.2	1.8
PA	#	210-218	1085	0.3	TMRRLADQS	97.05	2.9	0.5	1.1	1.4	1.8
PA	#	211-219	1085	0.3	MRRLADQSL	97.05	2.9	0.5	1.3	1.2	1.8
PA	#	212-220	1085	0.3	RRLADQSLP	97.51	2.5	0.5	1	1	1.5
PA	#	213-221	1085	0.2	RLADQSLPP	97.97	2	0.4	0.8	0.8	1.3
PA	#	214-222	1087	0.2	LADQSLPPN	97.52	2.5	0.7	1	0.7	1.2
PA	#	215-223	1087	0.2	ADQSLPPNF	97.7	2.3	0.7	0.8	0.7	1.1
PA	#	216-224	1087	0.3	DQSLPPNFS	97.06	2.9	0.7	1.6	0.6	1.1
PA	#	217-225	1087	0.3	QSLPPNFSS	97.15	2.9	0.7	1.4	0.7	1.2
PA	#	218-226	1087	0.3	SLPPNFSSL	96.87	3.1	0.7	1.7	0.7	1.3
PA	#	219-227	1088	0.4	LPPNFSSLE	95.13	4.9	0.9	3.3	0.6	1.5
PA	#	220-228	1089	0.5	PPNFSSLEN	93.94	6.1	0.9	4.2	0.9	1.7
PA	#	221-229	1088	0.6	PNFSSLENF	93.66	6.3	0.9	4.5	0.9	1.8
PA	#	222-230	1085	0.5	NFSSLENFR	93.92	6.1	0.9	4.2	0.9	1.8
PA	#	223-231	1085	0.7	FSSLENFRA	91.71	8.3	2.5	4.7	1.1	2
PA	#	224-232	1085	0.7	SSLENFRAY	91.71	8.3	2.5	4.8	1	1.9
PA	#	225-233	1085	0.6	SLENFRAYV	92.53	7.5	2.5	4.1	0.9	1.8
PA	#	226-234	1085	0.6	LENFRAYVD	92.9	7.1	2.5	3.9	0.7	1.5
PA	#	227-235	1085	0.5	ENFRAYVDG	93.18	6.8	2.6	3.7	0.6	1.2
PA	#	228-236	1085	0.4	NFRAYVDGF	94.65	5.3	2.6	2	0.7	1.2
PA	&	229-237	1085	0.7	FRAYVDGFE	89.03	11	6.6	3.6	0.7	1.3
PA	&	230-238	1086	0.7	RAYVDGFEP	89.04	11	6.6	3.6	0.7	1.3
PA	&	231-239	1089	0.7	AYVDGFEPN	88.8	11.2	6.7	3.8	0.7	1.4
PA	#	232-240	1091	0.5	YVDGFEPNG	90.56	9.4	8.2	0.6	0.6	1
PA	&	233-241	1091	0.9	VDGFEPNGC	84.14	15.9	8.1	7.1	0.6	1.2
PA	&	234-242	1091	0.9	DGFEPNGCI	84.14	15.9	8.1	7.1	0.6	1.2
PA	&	235-243	1091	0.9	GFEPNGCIE	84.23	15.8	8.1	7.1	0.5	1.1
PA	&	236-244	1093	0.9	FEPNGCIEG	84.26	15.7	8.1	7	0.7	1.2
PA	&	237-245	1093	0.9	EPNGCIEGK	84.26	15.7	8.1	7	0.6	1.1
PA	#	238-246	1093	0.5	PNGCIEGKL	92.77	7.2	5.9	0.9	0.5	0.7
PA	#	239-247	1094	0.4	NGCIEGKLS	92.96	7	5.9	0.6	0.5	0.7
PA	#	240-248	1095	0.5	GCIEGKLSQ	92.79	7.2	5.8	0.8	0.5	0.8
PA	#	241-249	1097	0.4	CIEGKLSQM	92.89	7.1	5.8	0.8	0.5	0.7
PA	#	242-250	1098	0.2	IEGKLSQMS	97.91	2.1	1.5	0.2	0.5	0.6
PA	#	243-251	1100	0.2	EGKLSQMSK	97.18	2.8	1.5	0.9	0.5	0.7
PA	#	244-252	1098	0.3	GKLSQMSKE	96.72	3.3	1.5	1.3	0.5	0.8
PA	#	245-253	1099	0.3	KLSQMSKEV	96.72	3.3	1.5	1.3	0.5	0.8
PA	#	246-254	1101	0.3	LSQMSKEVN	96.55	3.5	1.5	1.5	0.5	0.8
PA	#	247-255	1101	0.3	SQMSKEVNA	96.55	3.5	1.5	1.5	0.5	0.8
PA	#	248-256	1100	0.4	QMSKEVNAR	94.45	5.5	2	3.2	0.4	0.9
PA	#	249-257	1101	0.4	MSKEVNARI	94.64	5.4	2	3.2	0.2	0.7
PA	#	250-258	1132	0.6	SKEVNARIE	92.31	7.7	2.3	5	0.4	1
PA	#	251-259	1133	0.6	KEVNARIEP	91.35	8.6	4.3	4	0.4	0.9
PA	#	252-260	1134	0.6	EVNARIEPF	91.27	8.7	5	3.4	0.4	0.8
PA	&	253-261	1134	1.6	VNARIEPFL	65.96	34	19.1	14.3	0.6	1.4
PA	&	254-262	1139	1.7	NARIEPFLK	65.58	34.4	18.9	14.7	0.8	1.8
PA	&	255-263	1139	1.8	ARIEPFLKT	65.41	34.6	18.8	15	0.8	2.3
PA	&	256-264	1139	1.8	RIEPFLKTT	65.41	34.6	18.8	15	0.8	2.3
PA	&	257-265	1141	1.6	IEPFLKTTP	67.66	32.3	18.9	12.5	0.9	2.1
PA	&	258-266	1141	1.7	EPFLKTTPR	67.31	32.7	18.8	12.9	1	2.4
PA	&	259-267	1142	1.7	PFLKTTPRP	67.08	32.9	18.7	13	1.1	2.6
PA	&	260-268	1142	1.6	FLKTTPRPL	67.51	32.5	18.7	12.8	1	2.4
PA	&	261-269	1140	2	LKTTPRPLR	61.05	38.9	18.7	19.2	1.1	2.7
PA	&	262-270	1141	1	KTTPRPLRL	84.57	15.4	6.7	8.1	0.6	1.8
PA	&	263-271	1141	0.9	TTPRPLRLP	85.36	14.6	6.7	7.3	0.6	1.6
PA	&	264-272	1140	1.1	TPRPLRLPD	83.07	16.9	6.7	9.5	0.8	1.7
PA	&	265-273	1140	1	PRPLRLPDG	83.07	16.9	6.7	9.5	0.8	1.7
PA	&	266-274	1140	1.1	RPLRLPDGP	82.63	17.4	6.7	10.1	0.6	1.7
PA	&	267-275	1140	1.2	PLRLPDGPP	81.4	18.6	6.8	11.1	0.6	1.7
PA	&	268-276	1140	1.1	LRLPDGPPC	81.67	18.3	6.8	10.9	0.6	1.6
PA	&	269-277	1140	1.3	RLPDGPPCS	80.61	19.4	6.4	12.2	0.8	1.8
PA	&	270-278	1142	0.9	LPDGPPCSQ	87.13	12.9	5.6	6.7	0.5	1.4
PA	&	271-279	1142	0.9	PDGPPCSQR	87.39	12.6	5.5	6.6	0.5	1.3
PA	&	272-280	1142	0.9	DGPPCSQRS	87.39	12.6	5.5	6.6	0.5	1.3
PA	#	273-281	1143	0.4	GPPCSQRSK	95.63	4.4	1.6	2.4	0.3	0.9
PA	#	274-282	1143	0.4	PPCSQRSKF	95.54	4.5	1.6	2.4	0.4	1
PA	#	275-283	1143	0.3	PCSQRSKFL	95.98	4	1.6	1.8	0.6	1
PA	#	276-284	1143	0.2	CSQRSKFLL	97.38	2.6	1.6	0.4	0.6	0.9
PA	#	277-285	1142	0.2	SQRSKFLLM	97.29	2.7	1.6	0.4	0.7	1
PA	#	278-286	1142	0.1	QRSKFLLMD	99.3	0.7	0.2	0	0.5	0.6
PA	#	279-287	1142	0.3	RSKFLLMDA	94.92	5.1	4.4	0.2	0.5	0.7
PA	#	280-288	1141	0.3	SKFLLMDAL	94.83	5.2	4.4	0.2	0.6	0.8
PA	#	281-289	1141	0.3	KFLLMDALK	94.83	5.2	4.4	0.2	0.6	0.8
PA	#	282-290	1141	0.3	FLLMDALKL	94.83	5.2	4.4	0.2	0.6	0.8
PA	#	283-291	1141	0.4	LLMDALKLS	94.65	5.3	4.3	0.4	0.6	0.9
PA	#	284-292	1138	0.4	LMDALKLSI	94.38	5.6	4.3	0.8	0.5	0.9
PA	#	285-293	1137	0.4	MDALKLSIE	94.37	5.6	4.3	0.9	0.4	0.8
PA	#	286-294	1138	0.5	DALKLSIED	92.53	7.5	4.2	2.8	0.4	1
PA	#	287-295	1138	0.6	ALKLSIEDP	92.36	7.6	4.2	3	0.4	1.1
PA	#	288-296	1138	0.3	LKLSIEDPS	96.22	3.8	1.4	1.7	0.7	1.2
PA	#	289-297	1138	0.3	KLSIEDPSH	96.31	3.7	1.4	1.7	0.6	1.1
PA	#	290-298	1139	0.4	LSIEDPSHE	95.61	4.4	1.4	2.3	0.7	1.3
PA	#	291-299	1139	0.4	SIEDPSHEG	95.52	4.5	1.4	2.3	0.8	1.4
PA	#	292-300	1139	0.4	IEDPSHEGE	95.61	4.4	1.4	2	1	1.5
PA	#	293-301	1140	0.4	EDPSHEGEG	95.88	4.1	1.4	1.7	1.1	1.5
PA	#	294-302	1142	0.4	DPSHEGEGI	95.18	4.8	1.8	2	1.1	1.5
PA	#	295-303	1144	0.2	PSHEGEGIP	97.64	2.4	0.6	0.9	0.9	1.1
PA	#	296-304	1144	0.2	SHEGEGIPL	97.64	2.4	0.6	0.9	0.9	1.1
PA	#	297-305	1144	0.3	HEGEGIPLY	96.77	3.2	1	1.7	0.6	1
PA	#	298-306	1144	0.3	EGEGIPLYD	96.85	3.1	1	1.7	0.5	1
PA	#	299-307	1144	0.3	GEGIPLYDA	97.29	2.7	1	1.3	0.4	0.9
PA	#	300-308	1144	0.4	EGIPLYDAI	96.07	3.9	1	2.3	0.7	1.2
PA	#	301-309	1144	0.4	GIPLYDAIK	95.19	4.8	1	3.3	0.5	1.2
PA	#	302-310	1144	0.4	IPLYDAIKC	95.19	4.8	1	3.3	0.5	1.2
PA	#	303-311	1145	0.4	PLYDAIKCM	95.46	4.5	1	3	0.6	1.3
PA	#	304-312	1145	0.5	LYDAIKCMK	94.85	5.2	1	3.5	0.7	1.5
PA	#	305-313	1145	0.5	YDAIKCMKT	94.76	5.2	1	3.5	0.8	1.6
PA	#	306-314	1146	0.4	DAIKCMKTF	95.99	4	1	2.1	1	1.5
PA	#	307-315	1146	0.4	AIKCMKTFF	95.38	4.6	1	2.4	1.2	1.8
PA	#	308-316	1146	0.4	IKCMKTFFG	95.64	4.4	1	2.2	1.2	1.7
PA	#	309-317	1146	0.3	KCMKTFFGW	96.86	3.1	0.7	1.5	1	1.4
PA	#	310-318	1146	0.3	CMKTFFGWK	97.12	2.9	0.6	1.1	1.1	1.5
PA	#	311-319	1146	0.3	MKTFFGWKE	96.68	3.3	0.6	1.4	1.3	1.7
PA	#	312-320	1146	0.3	KTFFGWKEP	97.03	3	0.6	1.1	1.2	1.6
PA	#	313-321	1146	0.4	TFFGWKEPN	95.9	4.1	0.6	2	1.5	2
PA	#	314-322	1145	0.7	FFGWKEPNI	91.27	8.7	4.6	2.5	1.6	2.2
PA	&	315-323	1145	0.9	FGWKEPNIV	87.6	12.4	4.1	6.7	1.6	2.4
PA	&	316-324	1145	0.9	GWKEPNIVK	88.12	11.9	4.1	6.5	1.3	2.1
PA	&	317-325	1145	0.9	WKEPNIVKP	87.77	12.2	4	6.6	1.6	2.4
PA	&	318-326	1145	0.9	KEPNIVKPH	87.77	12.2	4	6.7	1.5	2.4
PA	&	319-327	1144	1	EPNIVKPHE	86.36	13.6	4.1	8.1	1.4	2.4
PA	&	320-328	1144	1	PNIVKPHEK	86.28	13.7	4.1	8.5	1.1	2.3
PA	&	321-329	1144	1	NIVKPHEKG	86.19	13.8	4.1	8.5	1.2	2.4
PA	&	322-330	1144	1	IVKPHEKGI	85.58	14.4	4.3	9.4	0.8	1.7
PA	&	323-331	1144	1	VKPHEKGIN	85.75	14.2	4.5	9	0.8	1.7
PA	#	324-332	1144	0.6	KPHEKGINP	93.18	6.8	1.5	4.5	0.9	1.9
PA	#	325-333	1144	0.6	PHEKGINPN	93.18	6.8	1.5	4.5	0.9	1.9
PA	#	326-334	1144	0.5	HEKGINPNY	93.71	6.3	1.5	4.2	0.6	1.6
PA	#	327-335	1145	0.5	EKGINPNYL	93.8	6.2	1.5	4.2	0.5	1.5
PA	#	328-336	1146	0.5	KGINPNYLL	94.59	5.4	1.5	3.5	0.4	1.3
PA	&	329-337	1146	1.3	GINPNYLLA	67.45	32.5	26.3	5.7	0.6	1.6
PA	&	330-338	1146	1.3	INPNYLLAW	67.54	32.5	26.2	5.7	0.6	1.6
PA	&	331-339	1146	1.4	NPNYLLAWK	66.14	33.9	26.1	6.9	0.9	1.7
PA	&	332-340	1146	1.4	PNYLLAWKQ	66.23	33.8	26.1	6.6	1	1.8
PA	&	333-341	1146	1.2	NYLLAWKQV	68.32	31.7	26.4	4.5	0.8	1.4
PA	&	334-342	1146	1.3	YLLAWKQVL	67.28	32.7	26.4	5.5	0.8	1.5
PA	&	335-343	1146	1.6	LLAWKQVLA	63.53	36.5	26.3	9.3	0.9	1.9
PA	&	336-344	1146	1.6	LAWKQVLAE	63.35	36.6	26.3	9.5	0.9	2
PA	&	337-345	1146	1.7	AWKQVLAEL	62.83	37.2	26	10.2	1	2.2
PA	&	338-346	1146	0.8	WKQVLAELQ	89.62	10.4	3.1	6.5	0.8	1.8
PA	&	339-347	1146	0.8	KQVLAELQD	89.44	10.6	3.1	6.7	0.8	1.9
PA	&	340-348	1146	0.8	QVLAELQDI	89.88	10.1	3.1	6.3	0.8	2
PA	&	341-349	1145	0.8	VLAELQDIE	89.61	10.4	3.1	6.7	0.6	2
PA	&	342-350	1145	0.9	LAELQDIEN	89.26	10.7	3.1	6.8	0.9	2.3
PA	&	343-351	1145	0.9	AELQDIENE	89.34	10.7	3.1	6.7	0.9	2.4
PA	#	344-352	1145	0.8	ELQDIENEE	90.66	9.3	2.4	5.9	1.1	2.4
PA	&	345-353	1145	1.1	LQDIENEEK	85.68	14.3	5	8.3	1	2.5
PA	&	346-354	1145	1	QDIENEEKI	86.72	13.3	5.2	6.8	1.3	2.7
PA	&	347-355	1145	1	DIENEEKIP	86.64	13.4	5.2	6.8	1.4	2.9
PA	&	348-356	1145	1	IENEEKIPK	86.38	13.6	5.2	6.9	1.5	3
PA	&	349-357	1145	1	ENEEKIPKT	86.38	13.6	5.2	6.9	1.5	2.9
PA	&	350-358	1145	1	NEEKIPKTK	86.81	13.2	5	6.8	1.4	2.7
PA	&	351-359	1144	1	EEKIPKTKN	87.15	12.8	5	6.9	1	2.4
PA	&	352-360	1145	0.9	EKIPKTKNM	87.77	12.2	5	6.6	0.7	2.1
PA	&	353-361	1145	0.9	KIPKTKNMK	87.86	12.1	5	6.6	0.6	2
PA	#	354-362	1145	0.7	IPKTKNMKK	92.58	7.4	2.3	4.5	0.6	2
PA	#	355-363	1145	0.6	PKTKNMKKT	93.36	6.6	2.3	3.8	0.6	1.8
PA	&	356-364	1145	0.9	KTKNMKKTS	88.65	11.4	4.7	5.9	0.8	2.1
PA	&	357-365	1145	0.9	TKNMKKTSQ	88.56	11.4	4.7	6	0.7	2.1
PA	&	358-366	1145	0.8	KNMKKTSQL	89.34	10.7	5.1	4.8	0.8	1.9
PA	&	359-367	1145	1.5	NMKKTSQLK	66.55	33.4	22.3	9.9	1.3	2.4
PA	&	360-368	1147	1.5	MKKTSQLKW	66.7	33.3	22.4	9.8	1.1	2.1
PA	&	361-369	1147	1.7	KKTSQLKWA	63.38	36.6	22.5	13.1	1	2
PA	&	362-370	1147	1.5	KTSQLKWAL	65.65	34.4	22.6	11	0.8	1.5
PA	&	363-371	1148	1.4	TSQLKWALG	66.11	33.9	22.6	10.6	0.7	1.3
PA	&	364-372	1148	1.5	SQLKWALGE	66.11	33.9	22.5	10.6	0.8	1.4
PA	&	365-373	1148	1.2	QLKWALGEN	71.69	28.3	22.4	5.2	0.7	1.3
PA	&	366-374	1149	1.2	LKWALGENM	71.28	28.7	22.5	5.6	0.7	1.3
PA	&	367-375	1149	1.2	KWALGENMA	71.37	28.6	22.5	5.6	0.5	1.1
PA	#	368-376	1150	0.4	WALGENMAP	94.78	5.2	3.5	1.4	0.3	0.8
PA	#	369-377	1150	0.4	ALGENMAPE	94.87	5.1	3.3	1.3	0.5	1
PA	#	370-378	1150	0.2	LGENMAPEK	97.91	2.1	0.4	1.1	0.5	1
PA	#	371-379	1150	0.4	GENMAPEKV	95.57	4.4	2.3	1.6	0.6	1.1
PA	#	372-380	1150	0.4	ENMAPEKVD	95.22	4.8	2.3	1.7	0.8	1.4
PA	#	373-381	1151	0.4	NMAPEKVDF	95.31	4.7	2.3	1.7	0.7	1.3
PA	#	374-382	1157	0.4	MAPEKVDFE	95.76	4.2	2.2	1.2	0.8	1.3
PA	#	375-383	1159	0.3	APEKVDFED	96.2	3.8	2.2	0.8	0.8	1.2
PA	#	376-384	1159	0.3	PEKVDFEDC	96.12	3.9	2.2	0.8	0.9	1.3
PA	#	377-385	1159	0.4	EKVDFEDCK	95.6	4.4	2.2	1	1.1	1.6
PA	#	378-386	1160	0.4	KVDFEDCKD	95.52	4.5	2.2	1.4	0.9	1.6
PA	&	379-387	1160	0.7	VDFEDCKDV	88.53	11.5	7.2	3.3	0.9	1.6
PA	&	380-388	1160	0.8	DFEDCKDVS	88.19	11.8	6.1	4.6	1.1	2.1
PA	&	381-389	1160	0.8	FEDCKDVSD	88.53	11.5	6.1	4.2	1.1	1.9
PA	&	382-390	1160	0.8	EDCKDVSDL	88.53	11.5	6.1	4.2	1.1	1.9
PA	&	383-391	1159	1.6	DCKDVSDLR	66.01	34	20.9	11.9	1.2	2.2
PA	&	384-392	1159	1.6	CKDVSDLRQ	66.26	33.7	20.9	11.7	1.1	2.1
PA	&	385-393	1158	1.6	KDVSDLRQY	66.32	33.7	20.9	11.7	1.1	2.1
PA	&	386-394	1158	1.8	DVSDLRQYD	63.56	36.4	20.4	14.9	1.1	2.4
PA	&	387-395	1158	1.9	VSDLRQYDS	63.3	36.7	20.1	15.5	1.1	2.6
PA	&	388-396	1158	1.6	SDLRQYDSD	67.7	32.3	20.5	10.9	0.9	2.3
PA	&	389-397	1158	1.5	DLRQYDSDE	68.05	32	22.8	8.2	0.9	2.2
PA	&	390-398	1158	1.5	LRQYDSDEP	68.05	32	22.7	8.2	1	2.2
PA	&	391-399	1158	1.7	RQYDSDEPE	65.28	34.7	22.3	11.1	1.4	2.9
PA	&	392-400	1157	1.7	QYDSDEPES	64.04	36	24.1	10.8	1	3
PA	&	393-401	1156	1.9	YDSDEPESR	63.84	36.2	20.2	14.8	1.1	3.5
PA	&	394-402	1156	1.9	DSDEPESRS	63.93	36.1	20.2	14.8	1	3.4
PA	&	395-403	1156	1.7	SDEPESRSL	67.21	32.8	20.4	11.4	1	2.9
PA	&	396-404	1155	2	DEPESRSLA	65.89	34.1	15	18	1.1	3.2
PA	&	397-405	1155	1.9	EPESRSLAS	66.15	33.9	15.1	17.7	1.1	3.2
PA	&	398-406	1155	1.9	PESRSLASW	66.41	33.6	15.1	17.2	1.3	3.2
PA	&	399-407	1148	2.1	ESRSLASWI	63.68	36.3	15	20	1.3	3.5
PA	&	400-408	1149	1.9	SRSLASWIQ	63.88	36.1	15.4	19.8	1	2.7
PA	&	401-409	1150	1.5	RSLASWIQS	72.26	27.7	15.9	11	0.8	2.1
PA	&	402-410	1150	1.3	SLASWIQSE	72.52	27.5	20.3	6.3	0.9	1.9
PA	&	403-411	1150	1.3	LASWIQSEF	72.52	27.5	20.3	6.3	1	2
PA	&	404-412	1149	1.3	ASWIQSEFN	72.93	27.1	20.4	5.9	0.8	1.7
PA	#	405-413	1150	0.5	SWIQSEFNK	94.09	5.9	2.9	2.4	0.6	1.2
PA	#	406-414	1150	0.4	WIQSEFNKA	94.78	5.2	2.9	1.8	0.5	0.9
PA	#	407-415	1150	0.4	IQSEFNKAC	94.96	5	2.9	1.8	0.3	0.7
PA	#	408-416	1146	0.2	QSEFNKACE	98.17	1.8	1	0.5	0.3	0.5
PA	#	409-417	1144	0.2	SEFNKACEL	98.16	1.8	1	0.5	0.3	0.5
PA	#	410-418	1143	<1	EFNKACELT	99.65	0.3	0.1	0	0.3	0.3
PA	#	411-419	1143	0.1	FNKACELTD	98.6	1.4	0.5	0.5	0.3	0.6
PA	#	412-420	1142	0.1	NKACELTDS	98.69	1.3	0.5	0.5	0.3	0.5
PA	#	413-421	1142	0.3	KACELTDSS	96.85	3.2	1.6	1.2	0.4	0.8
[truncated: 2,729 more rows]
