# Supplementary material for: Dynamics of Influenza A (H5N1) virus protein sequence diversity
Source: PeerJ. 2020 May 27;7:e7954. doi: 10.7717/peerj.7954 (PMC7261124; doi:10.7717/peerj.7954)
Supplement: Table S4 — Only HLA supertypes or alleles with a positive prediction are shown. B cell antigenicity prediction was negative for all the peptides and thus, not shown. Cells in grey shade indicate negative prediction. [file peerj-08-7954-s005.xlsx]

## Sheet: Table S5
Supplemental Table S4:
Immune relevance of index switching positions.
Only HLA supertypes or alleles with a positive prediction are shown. B cell antigenicity prediction was negative for all the peptides and thus, not shown. Cells in grey shade indicate negative prediction.
Host	Protein	Position	Support	Index	Incidence (%)	HLA Class I prediction				HLA Class II prediction
		Position				Supertype				Allele
				Major		A2	A26	B27	B39	DRB1_0101	DRB1_0701	DRB1_1501	DRB1_0401	DRB1_0802	DRB3_0101	DRB3_0202
Avian	HA	170 - 178	2350	NSTYPTIKR	0.1758
				DNA......	0.1426
Avian	HA	171 - 179	2352	NAYPTIKRS	0.2071
				ST.......	0.1756
Avian	PA-X	207 - 215	719	SQEPCAGLP	29.91%
				.L....D..	28.52%
Human	HA	94 - 102	301	YIVEKINPA	29.91%	/	/						/	/
				.....A..V	20.27%	/	/			/	/	/	/	/	/	/
Human	PB1	214 - 222	155	KKSYLIRAL	50.33%
				.R.......	0.4839			/	/
Human	NA	41 - 49	28	WHPNQPEPC	82.15%
				GNQH.A...	14.29%
Human	NA	81 - 89	242	RGWAVHSKD	29.34%
				S....Y...	29.34%
Human	NA	82 - 90	242	GWAVYSKDN	53.72%
				....H....	32.24%
